# Supplementary material for: Personalized transcriptome signatures in a cardiomyopathy stem cell biobank
Source: PubMed Central journal article supplement (PMC11118309; doi:10.1101/2024.05.10.593618), 2024-05-14
Supplement: media-1.pdf [file media-1.pdf]

**A**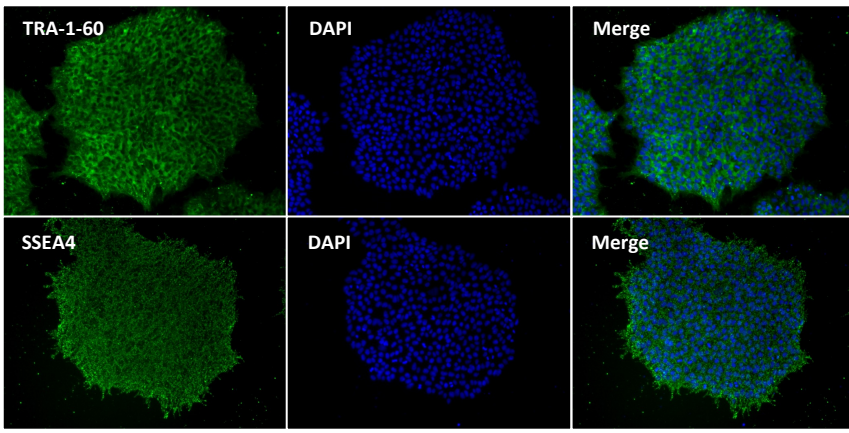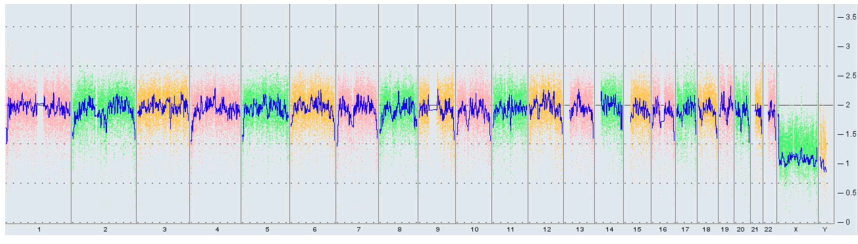**B**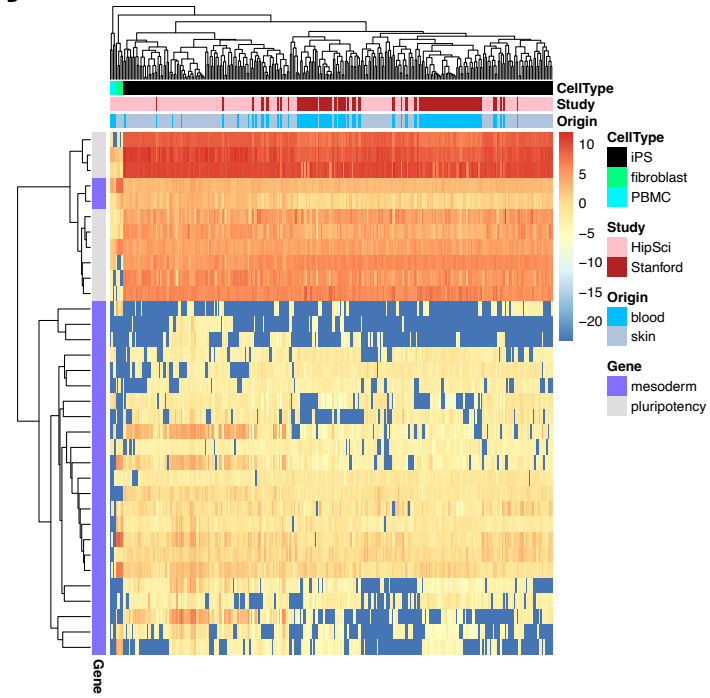

**Supplemental Figure 1. iPS cells were successfully reprogrammed. A.** Representative quality control images. All iPS lines were confirmed to express pluripotency markers TRA-1-60 and SSEA4 and show normal karyotype. Staining (10X magnification) and karyotype report shown for male line 941. **B.** Expression from 196 iPS lines from the HipSci project of the Wellcome Sanger Institute and EMBL was compared to the expression of 102 iPS lines from our biobank. Key pluripotency genes as well as mesoderm genes were selected for examination based on the iPSCORE resource. Stanford biobank lines express pluripotency genes, cluster away from PBMC and fibroblast samples, and cluster with the benchmark HipSci samples.

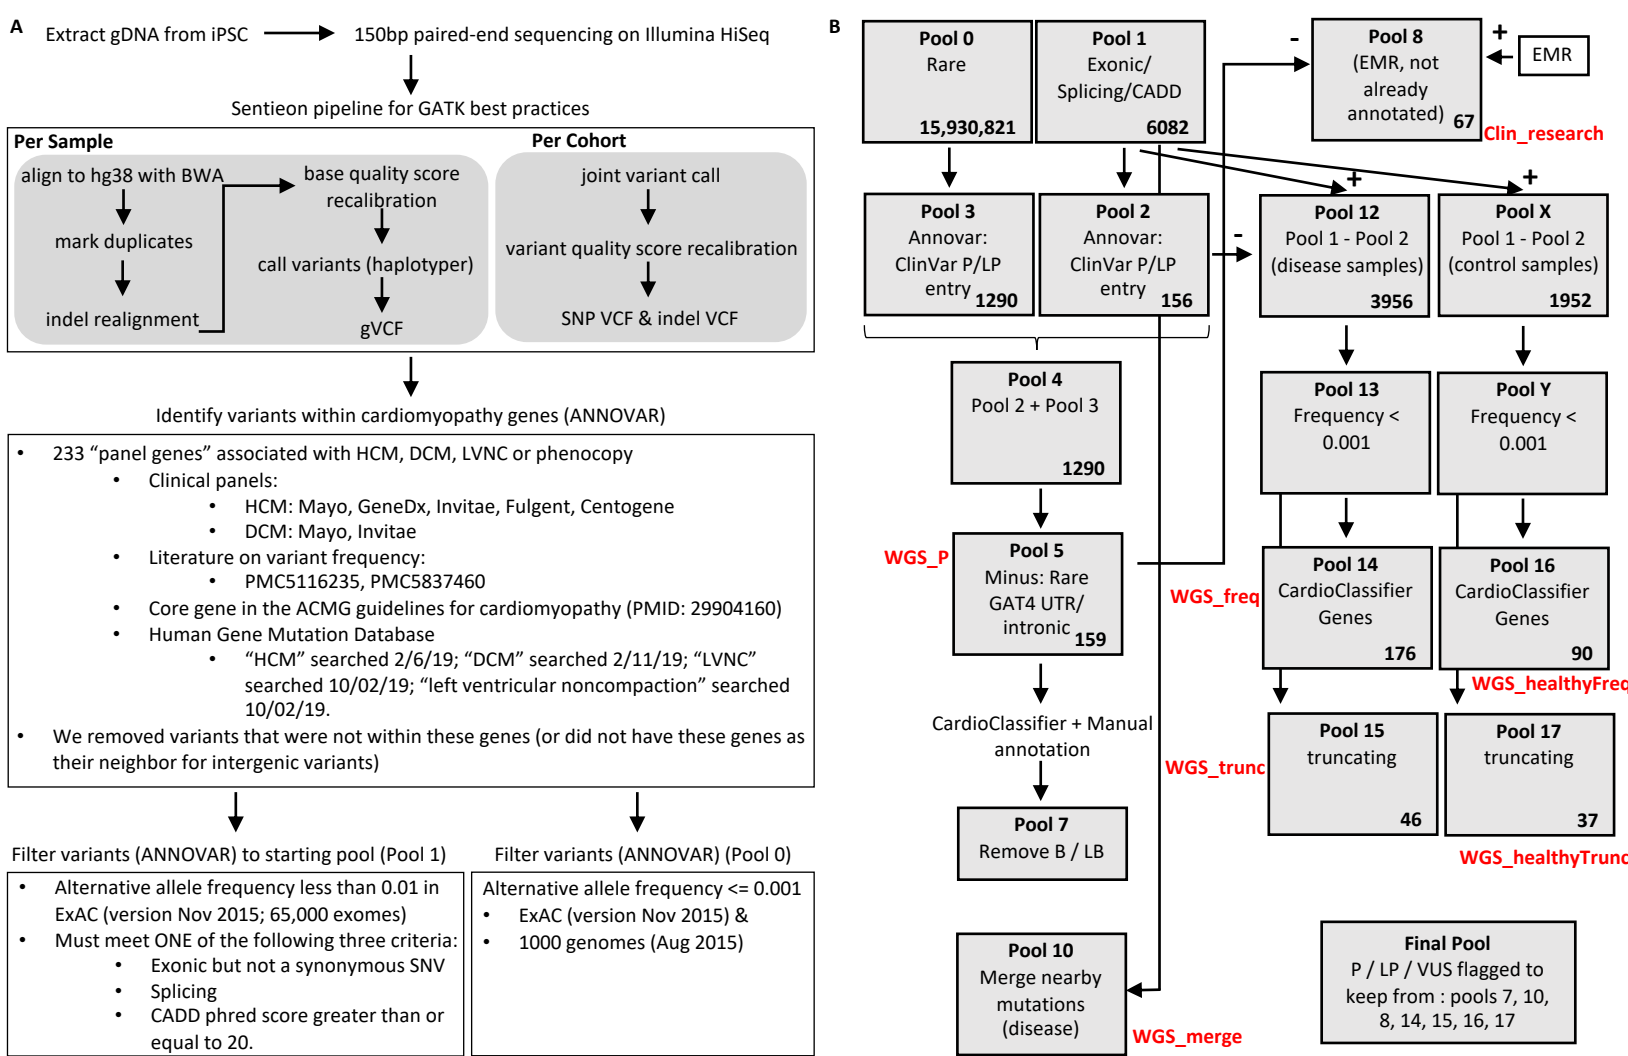

- C** **WGS\_P**: variant in pool 5.
- WGS\_VUS**: variant in pool 1 but not pool 5
- WGS\_NotInPanel**: gene not one of the “panel genes” we curated
- WGS\_class**: for variants we did not detect because they are larger than a SNP or Indel
- WGS\_vqsr**: variant present in earlier cohort vcf (when we had only a subset of the WGS data) but lost due to variant quality score recalibration on larger cohort
- WGS\_merge**: For insertion deletions that were broken up as a byproduct of our analysis pipeline. We had the correct sequence identified in pool 1, but it was split across multiple “mutations” and didn’t make it to pool 5. Instead we found it in pool 10 merge analysis.
- WGS\_AbsentDoubleCheck**: This is for a variant that we didn’t find in pool 1 but we double checked if it was in the data because it was in the EMR, so we went back and checked the vcf cohort file before vqsr to see if present in the sample, and still not there. So conclusively not in our WGS.
- WGS\_freq**: variant found in pool 14
- WGS\_trunc**: variant found in pool 15
- WGS\_healthyFreq**: variant found in pool 16
- WGS\_healthyTrunc**: variant found in pool 17
- Clin\_P**: variant listed in EMR and annotated as P/LP in EMR
- Clin\_conflict**: variant listed in EMR and annotated as conflicting interpretations in EMR
- Clin\_VUS**: variant listed in EMR and annotated as VUS in EMR
- Clin\_NotInPanel**: patient underwent clinical testing but variant not listed in EMR because gene (or splice/intronic region of gene) not in the panel
- Clin\_Absent**: patient underwent clinical testing but variant not listed in EMR despite gene being included in the panel. In some cases, the EMR doesn’t contain VUSs. So it’s possible they found the VUS but it didn’t make it into the EMR (or at least the subset of the EMR data that the research team received)
- Clin\_fam**: variant listed in EMR only associated with a family member and not confirmed in this patient
- Clin\_research**: Didn’t have ClinVar flag from Annovar (not in pool 5) nor was it flagged as P / LP in EMR. However subsequent analysis of EMR variants that weren’t P/LP annotated pulled this out (pool 8)
- \*Clin\_P and WGS\_P do not mean our final annotation is P/LP.

**Supplemental Figure 2. Mutation filtering.** **A.** Mutations were processed as outlined. **B.** The ANNOVAR-annotated lists were further culled before manual annotation. The number of mutations in each pool is indicated in bold. The same mutation in multiple lines is counted multiple times. See Supplemental Methods for additional description. **C.** Filter shorthand used in Table S5 to demarcate how each candidate mutation was found. A subset of these are also labeled in red in the diagram (B). Abbreviations: pathogenic / likely pathogenic (P/LP), benign / likely benign (B/LB).

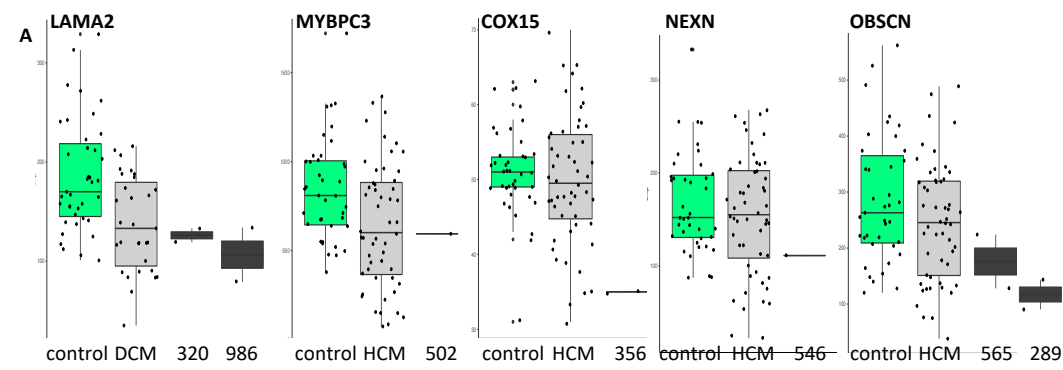

| Donor | Disease | Gene   | RNA        | REF count                    | ALT count | % ALT | Annotation             | Filters   |
|-------|---------|--------|------------|------------------------------|-----------|-------|------------------------|-----------|
| 320   | DCM     | LAMA2  | 320dms0_r1 | 109                          | 30        | 22%   | LIKELEY PATHOGENIC     | WGS_P     |
|       |         |        | 320dms0_r2 | 141                          | 18        | 11%   |                        |           |
| 986   | DCM     | LAMA2  | 986dms0_r1 | 280                          | 6         | 2%    | LIKELEY PATHOGENIC     | WGS_P     |
|       |         |        | 986dms0_r2 | 473                          | 56        | 11%   |                        |           |
| 502   | HCM     | MYBPC3 | 502dms0_r1 | 1479                         | 232       | 14%   | PATHOGENIC             | WGS_P     |
| 356   | HCM     | COX15  | 356dms0_r1 | 44                           | 1         | 2%    | UNCERTAIN SIGNIFICANCE | WGS_trunc |
|       |         |        | 356dms0_r2 | 28                           | 7         | 20%   |                        |           |
| 546   | HCM     | NEXN   | 546dms0_r1 | 144                          | 8         | 5%    | UNCERTAIN SIGNIFICANCE | WGS_trunc |
| 565   | HCM     | OBSCN  | 565dms0_r1 | 65                           | 32        | 33%   | UNCERTAIN SIGNIFICANCE | WGS_trunc |
|       |         |        | 565dms0_r2 | 36                           | 7         | 16%   |                        |           |
| 289   | HCM     | OBSCN  | 289dms0_r1 | Zero reads. Intronic variant |           |       | UNCERTAIN SIGNIFICANCE | WGS_merge |
|       |         |        | 289dms0_r2 |                              |           |       |                        |           |

**B 145 donors with clinical genetic testing**

|      | Evaluated | P/LP Identified |                                 |                                      |
|------|-----------|-----------------|---------------------------------|--------------------------------------|
|      |           | Clin & WGS      | Clin Only                       | WGS Only                             |
| DCM  | 53        | 28              | 2 (FBN1 [Marfan], tRNA Leu UUR) | 5 (FLNC, FLNC, LAMA2, MYBPC3, OBSL1) |
| LVNC | 10        | 1               |                                 |                                      |
| HCM  | 82        | 29              |                                 | 3 (MYBPC3 intronic, DSP, ALPK3)      |

**2 donors with clinical genetic testing of a family member**

|     | Evaluated | P/LP Identified      |                                                                               |
|-----|-----------|----------------------|-------------------------------------------------------------------------------|
|     |           | Clin on family & WGS | Clin Only                                                                     |
| HCM | 2         | 1                    | 1 misidentified (WGS revealed mutation NOT in patient, only in family member) |

**Supplemental Figure 3. WGS annotation is aided by RNA-seq, but still provides minimal improvement over clinical genetic testing.**

**A.** RNA-seq from differentiated cardiomyocytes provided additional support to mutation annotation. Potentially truncating mutations (heterozygous, stopgain mutations) were evaluated for differential allelic expression. Top boxplots show the overall (not accounting for allele) expression using our combat-corrected RNA-seq data. Bottom table shows read counts at the mutant loci exported from bam files utilizing wasp output feature in STAR to capture allelic information. The first three line-gene pairs (2 LAMA2 mutations and MYBPC3) show mutations we already annotated as P / LP before taking into account RNA data (see supplemental method for filters corresponding to WGS\_P). The remaining mutations are those which only made it past our filters due to their reduced expression of the alternative allele in the presence of detectable reference allele expression (table) and their overall reduced expression in relation to the cohort (box plots). Even with this observation, there was not enough data to call these mutations as P / LP per ACMG guidelines, so they do not appear as definitive, for example in Fig 2A chart of P / LP mutations. Note that the OBSCN mutation in 565 was not deemed worthy of passing filters (see Table S5 for annotation notes), but was kept in as a comparison for OBSCN mutation in 289 which did show up as VUS to keep. (Note r1 and r2 in table refer to replicate differentiation experiments.) **B.** 145 cardiomyopathy patients had clinical genetic testing results in their EMR to compare to the WGS (left table). Indicated are the number of lines where we found a P/LP mutation via both methods, or only via one of the methods. Mutations found only in the clinical test were due to the omission of the gene from our “panel genes” used to annotate mutations. See supplemental table 5 for full explanation of why mutations were found or not.

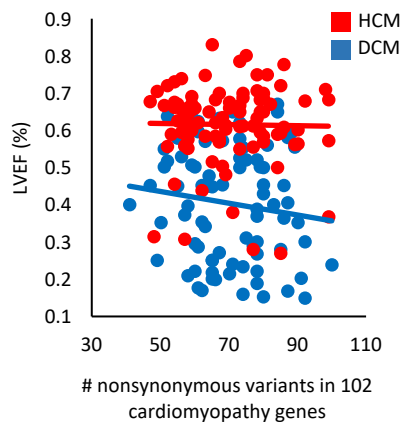

**Supplemental Figure 4. Comparison of the number of nonsynonymous variants in the Puckelwartz et al genes with left ventricular ejection fraction when combining P/LP and nopatho donors.**

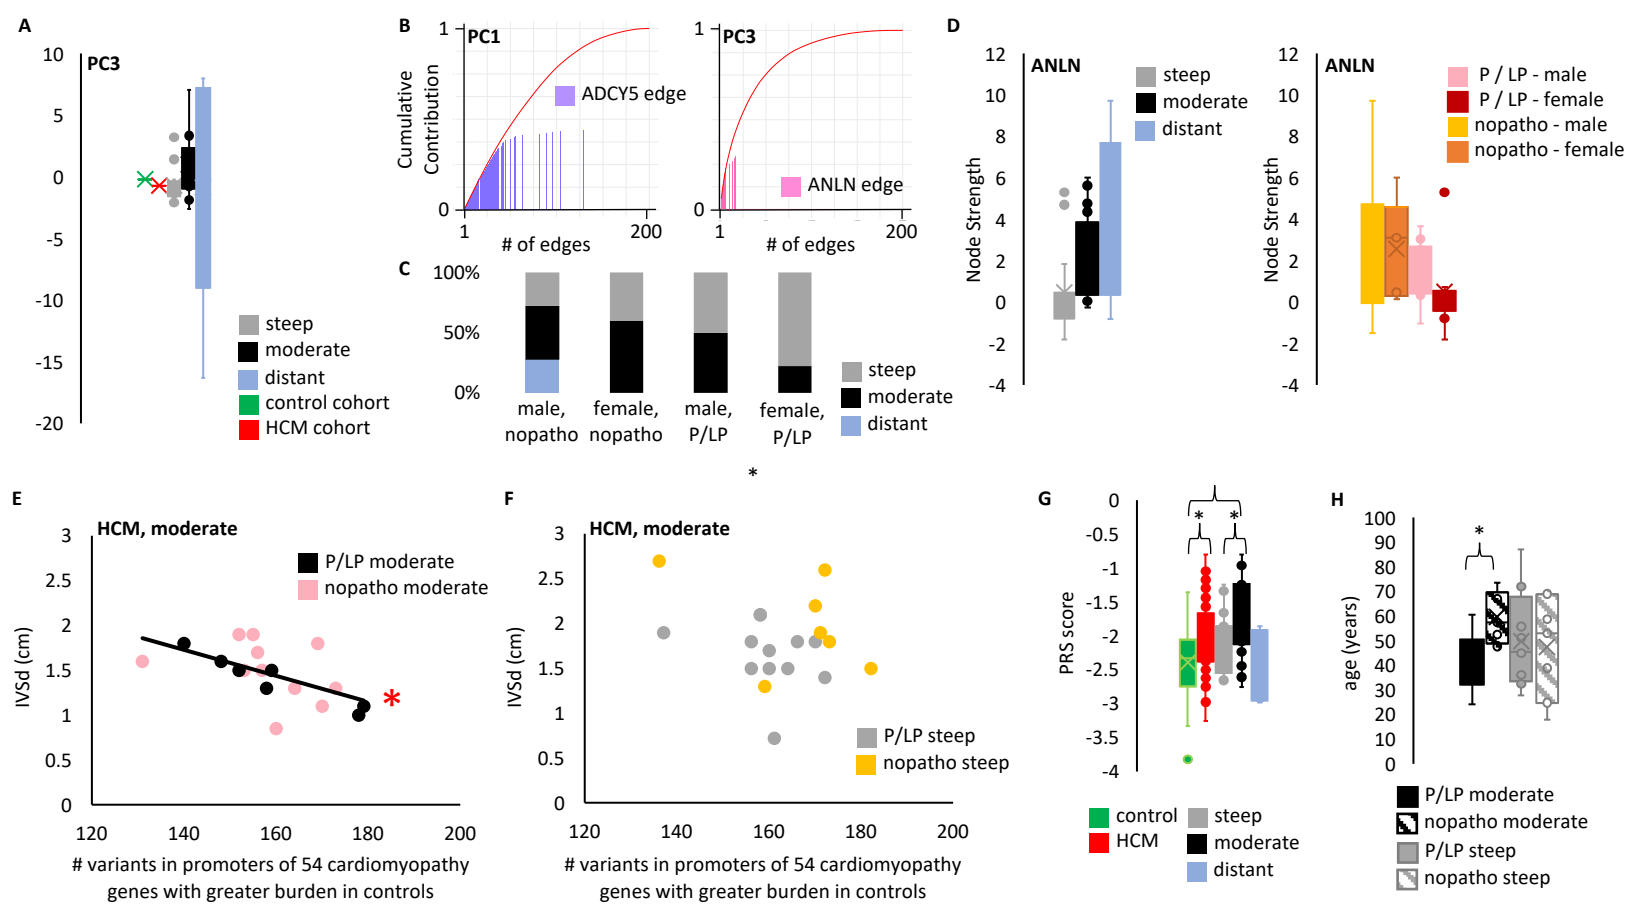

**Supplemental Figure 5. Features of demographics, the transcriptional network, and genetic background distinguish HCM-moderate and HCM-steep samples.** **A.** PCA analysis of the co-expression correlations of the HCM network was performed as outlined in Figure 4B. We tested for principal components distinguishing steep and moderate HCM samples. Principal component 3 showed the greatest difference between steep and moderate samples. **B.** Plotted is the cumulative contribution to the principal component with each subsequent edge, ordered by edges with the greatest relative contribution first. (Left) *ADCY5* edges are highlighted in purple for their contributions to PC1. (Right) *ANLN* edges are highlighted in pink for their contribution to PC3. **C.** Demographic distribution of HCM samples between the three RNA groups. **D.** *ANLN* node strength (sum of all surrounding edge strengths) for HCM lines. **E.** Plotting the mutation burden in the same 54 promoters for all of the moderate samples, reveals a significant relationship between burden and IVSd ( $p$ -value = 0.0117), **F.** but not for steep samples. **G.** A published polygenic risk score for HCM was applied. Moderate samples on average show the expected increase in score while steep samples do not. (t-test: Control vs Moderate-HCM  $p$ -value = 0.00000257452. Control vs Steep-HCM  $p$ -value = 0.137757459. Control vs Distant-HCM  $p$ -value = 0.685843043. Control vs HCM-all  $p$ -value = 0.000000338723. Moderate-HCM vs Steep-HCM  $p$ -value = 0.011904577). **H.** Moderate HCM lines with a known pathogenic or likely pathogenic mutation come from younger donors ( $p$ -value = 0.00277).

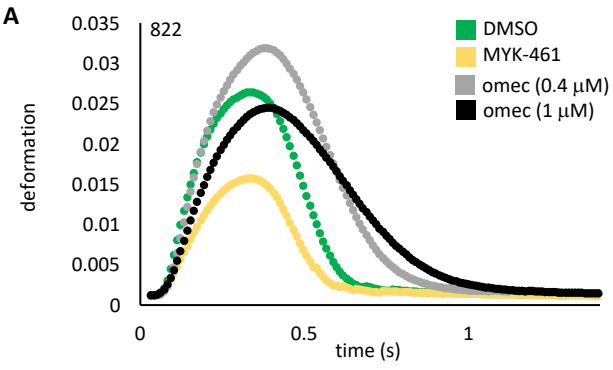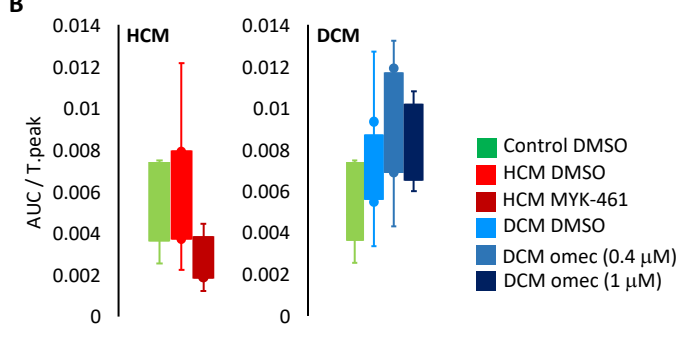

**Supplemental Figure 6. Treatment with mavacamten or omecamtiv mecarbil alters contractility.** **A.** Cardiomyocytes were treated with the small molecule sarcomere activator (omecamtiv mecarbil) or inhibitor (mavacamten) for 48 hours. Kinetic Image Cytometer microscopy was used to visually measure cellular deformation over time. Presented is a representative image from a control donor sample (line 822). Mavacamten reduces contractility, while omecamtiv mecarbil increases contractility. **B.** AUC (the area under the curve) and T.peak (the time between peaks) were extracted from the curves. AUC/T.peak represents the total deformation normalized to the length of a beat. Mavacamten treatment blunts and omecamtiv mecarbil treatment increases AUC/T.peak.

## Supplemental Table Legends:

### Supplemental Table 1. Sample level demographics.

**Supplemental Table 2. Whole genome sequencing passes quality control.** Cohort-level summary of whole genome sequencing showed appropriate values for key metrics. One control sample (line 2002) had low coverage below 20X.

### Supplemental Table 3. Sample level whole genome sequencing quality control metrics.

**Supplemental Table 4. "Panel Genes" analyzed for potentially harboring cardiomyopathy mutations.** Column A – Gene list includes isoform entries and gene synonyms to fully capture the entries from the respective sources. Column B – ACMG guidelines list comes from Table 1 in (PMID: 29904160). ACMG identified DCM-specific genes as well as recommended DCM patients be tested for HCM and ARVC genes (indicated with "test" in annotation). Likewise, ACMG recommended testing LVNC patients for the associated cardiomyopathy, thus we used the DCM gene list (indicated with "test" in the annotation). Column C – LVNC genes from HGMD. Searched "LVNC" and "left ventricular noncompaction" on 10/2/19. Columns D-K: HCM genes. Column D – Designation in PMC5837460. Column E – HCM designation in PMC5116235. Column F – HCM genes from HGMD. Searched "HCM" on 2/6/19. Column G – Fulgent hypertrophic cardiomyopathy panel. Column H – Centogene hypertrophic cardiomyopathy panel. Column I – Mayo Clinic Inherited Disease Panel, hypertrophic cardiomyopathy designation. Column J – GeneDx hypertrophic cardiomyopathy panel. Column K – Invitae hypertrophic cardiomyopathy panel. Columns L-O: DCM genes. Column L - DCM designation in PMC5116235. Column M – DCM genes from HGMD. Searched "DCM" on 2/11/19. Column N – Invitae Cardiomyopathy Comprehensive Panel. Column O – Mayo Clinic Inherited Disease Panel, dilated cardiomyopathy designation. Abbreviations: American College of Medical Genetics (ACMG), Human Gene Mutation Database (HGMD).

**Supplemental Table 5. Candidate cardiomyopathy mutations.** Pathogenic or likely pathogenic identified in our cohort. Assigning pathogenicity is an imperfect process and these designations should be periodically re-evaluated. Column A – Mutation sequence. Column B – Gene name. Column C and D - ANNOVAR functional annotation. Column E – dbSNP ID where available (or for similar mutation at that loci as indicated). Column F – Donor ID. Column G – Disease of donor. Column H – Pathogenicity assignment. Column I – Notes on assignment where applicable. Notes use ACMG abbreviations for classifying variants. Column J – Genetic analysis platform used on the donor. All mutations list "wgs" to indicate we performed WGS on samples from this donor for this study. Some donors also list "clin" to indicate they received clinical genetic testing as denoted in their electronic medical record. Column K – Explanation for how the mutation was found (which of the clinical/WGS filters) or was not found (in cases where only found by clinical analysis or WGS but not both). (See Supplemental Figure 2 B & C for explanation of column K annotation.)

**Supplemental Table 6. Sample level RNA-seq quality control metrics.** Columns A-D provide sample name, line number, cell type (iPS or iPS-derived cardiomyocytes [cm]), and drug condition (for iPS cells, neither drug nor DMSO control was added, so condition is "ips"). Column E indicates biological replicate. For iPS cells, this indicates the same iPS clonal line harvested for RNA on a different day of culture. For cardiomyocytes this indicates the same iPS line undergoing a second 30-day cardiomyocyte differentiation process and subsequent drug treatment. Columns F and G indicate batch for library generation and sequencing pool. Columns H-N provide outputs from QC tools. For each output, the tool name is provided in parentheses.

Table S1

| ID  | Age  | Gender | Race             | Southeast Asian | Other          | Ethnicity              | Disease                         | LVEF (%) | IVSD (cm) |
|-----|------|--------|------------------|-----------------|----------------|------------------------|---------------------------------|----------|-----------|
| 67  | 60.0 | Female | White            |                 |                | Not Hispanic or Latino | HCM                             | 80.00%   | 1.5       |
| 70  | 24.3 | Male   | White            |                 |                | Hispanic or Latino     | HCM                             | 65.00%   | 2.5       |
| 283 | 50.9 | Female | White            |                 |                | Not Hispanic or Latino | Healthy Control                 |          |           |
| 284 | 41.2 | Female | White            |                 |                | Not Hispanic or Latino | Healthy Control                 |          |           |
| 287 | 47.6 | Female | White            |                 |                | Not Hispanic or Latino | HCM                             | 67.10%   | 1.7       |
| 289 | 67.1 | Male   | White            |                 |                | Not Hispanic or Latino | HCM                             | 68.50%   | 1.5       |
| 295 | 77.1 | Male   | White            |                 |                | Not Hispanic or Latino | Healthy Control                 |          |           |
| 297 | 52.9 | Male   | White            |                 |                | Not Hispanic or Latino | Healthy Control                 |          |           |
| 298 | 70.2 | Female | White            |                 |                | Not Hispanic or Latino | HCM                             | 67.50%   | 2.2       |
| 301 | 73.5 | Male   | White            |                 |                | Not Hispanic or Latino | HCM                             | 60.90%   | 1.3       |
| 304 | 32.8 | Female | White            |                 |                | Not Hispanic or Latino | LVNC (not clinically diagnosed) | 44.80%   | 0.86      |
| 310 | 73.3 | Male   | African American |                 |                | Not Hispanic or Latino | HCM                             | 58.50%   | 1.4       |
| 319 | 87.1 | Female | White            |                 |                | Not Hispanic or Latino | HCM                             | 70.00%   | 1.9       |
| 320 | 57.6 | Female | White            |                 |                | Not Hispanic or Latino | DCM                             | 62.00%   | 0.89      |
| 333 | 32.1 | Male   | White            |                 |                | Not Hispanic or Latino | HCM                             | 66.70%   | 1.6       |
| 334 | 63.8 | Male   | African American |                 |                | Unknown                | HCM                             | 56.40%   | 1.3       |
| 338 | 63.2 | Male   | White            |                 |                | Not Hispanic or Latino | DCM                             | 55.00%   | 0.94      |
| 352 | 42.5 | Female | White            |                 |                | Not Hispanic or Latino | HCM                             | 48.10%   | 1.8       |
| 356 | 48.7 | Male   | White            |                 |                | Not Hispanic or Latino | HCM                             | 83.00%   | 1.5       |
| 358 | 81.3 | Male   | White            |                 |                | Not Hispanic or Latino | HCM                             | 50.00%   | 1.4       |
| 367 | 55.6 | Male   | Other            |                 |                | Hispanic or Latino     | DCM                             | 58.00%   | 1.2       |
| 371 | 35.8 | Male   | White            |                 |                | Not Hispanic or Latino | HCM                             | 65.40%   | 1.5       |
| 372 | 71.8 | Male   | White            |                 |                | Not Hispanic or Latino | Healthy Control                 |          |           |
| 373 | 47.1 | Male   | Asian            |                 |                | Not Hispanic or Latino | HCM                             | 59.30%   | 1.5       |
| 374 | 53.0 | Female | White            |                 |                | Not Hispanic or Latino | HCM                             | 68.30%   | 1.3       |
| 375 | 57.4 | Male   | White            |                 |                | Not Hispanic or Latino | HCM                             | 63.00%   | 1.6       |
| 376 | 69.8 | Female | White            |                 |                | Not Hispanic or Latino | HCM                             | 66.00%   | 1.9       |
| 378 | 30.9 | Female | White            |                 |                | Not Hispanic or Latino | DCM                             | 40.00%   | 1         |
| 379 | 68.5 | Male   | White            |                 |                | Not Hispanic or Latino | Healthy Control                 |          |           |
| 380 | 67.0 | Male   | White            |                 |                | Not Hispanic or Latino | HCM                             | 26.90%   | 0.85      |
| 386 | 46.3 | Male   | White            |                 |                | Not Hispanic or Latino | HCM                             | 61.20%   | 2.2       |
| 388 | 55.0 | Female | White            |                 |                | Not Hispanic or Latino | HCM                             | 57.00%   | 1.9       |
| 390 | 45.6 | Female | White            |                 |                | Not Hispanic or Latino | DCM                             | 29.00%   | 0.81      |
| 393 | 41.9 | Male   | White            |                 |                | Not Hispanic or Latino | DCM                             | 21.00%   | 0.91      |
| 394 | 35.1 | Female | African American |                 |                | Not Hispanic or Latino | DCM                             | 56.00%   | 0.84      |
| 395 | 55.7 | Male   | White            |                 |                | Not Hispanic or Latino | HCM                             | 61.40%   | 1.7       |
| 397 | 17.9 | Male   | Asian            |                 |                | Not Hispanic or Latino | HCM                             | 68.30%   | 2.6       |
| 398 | 52.4 | Male   | Asian            |                 |                | Not Hispanic or Latino | HCM                             | 36.80%   | 1.3       |
| 399 | 52.9 | Female | African American |                 |                | Not Hispanic or Latino | DCM                             | 16.00%   | 0.95      |
| 405 | 38.8 | Male   | White            |                 |                | Not Hispanic or Latino | HCM                             | 59.00%   | 2.7       |
| 411 | 60.1 | Female | White            |                 |                | Not Hispanic or Latino | DCM                             | 57.00%   | 1.1       |
| 413 | 69.6 | Male   | Other            |                 | Middle Eastern | Not Hispanic or Latino | HCM                             | 57.80%   | 1.8       |
| 415 | 24.5 | Male   | Other            |                 | Filipino       | Not Hispanic or Latino | LVNC                            | 56.80%   | 0.93      |
| 419 | 36.0 | Female | Asian            |                 |                | Not Hispanic or Latino | HCM                             | 68.20%   | 1.5       |
| 420 | 56.4 | Male   | White            |                 |                | Not Hispanic or Latino | HCM                             | 43.80%   | 1.3       |
| 421 | 32.7 | Female | White            |                 |                | Not Hispanic or Latino | HCM                             | 27.90%   | 1.4       |
| 428 | 59.6 | Female | White            |                 |                | Not Hispanic or Latino | DCM                             | 57.90%   | 1.3       |
| 431 | 44.5 | Male   | White            |                 |                | Not Hispanic or Latino | HCM                             | 61.10%   | 2.9       |
| 437 | 56.5 | Female | White            |                 |                | Not Hispanic or Latino | DCM                             | 43.00%   | 0.72      |
| 438 | 51.2 | Male   | White            |                 |                | Not Hispanic or Latino | HCM                             | 56.90%   | 1.8       |
| 440 | 50.3 | Male   | White            |                 |                | Not Hispanic or Latino | HCM                             | 55.00%   | 1.8       |
| 485 | 41.6 | Male   | White            |                 |                | Not Hispanic or Latino | HCM                             |          | 1.3       |
| 487 | 70.7 | Female | White            |                 |                | Not Hispanic or Latino | HCM                             | 70.40%   | 1.2       |
| 489 | 58.3 | Male   | White            |                 |                | Not Hispanic or Latino | HCM                             | 59.90%   | 1.4       |
| 493 | 58.5 | Female | White            |                 |                | Not Hispanic or Latino | DCM                             | 52.00%   | 0.76      |
| 494 | 57.5 | Female | White            |                 |                | Not Hispanic or Latino | DCM                             | 50.00%   | 0.92      |
| 495 | 40.6 | Male   | White            |                 |                | Not Hispanic or Latino | DCM                             | 57.20%   | 0.83      |
| 496 | 25.4 | Male   | White            |                 |                | Not Hispanic or Latino | HCM                             | 63.40%   | 2.8       |
| 501 | 47.1 | Male   | White            |                 |                | Not Hispanic or Latino | HCM                             | 66.70%   | 1.1       |
| 502 | 36.0 | Female | White            |                 |                | Not Hispanic or Latino | HCM                             | 77.60%   | 1.3       |



|     |      |        |                  |     |          |                        |                                |        |      |
|-----|------|--------|------------------|-----|----------|------------------------|--------------------------------|--------|------|
| 503 | 19.1 | Male   | Other            |     | Filipino | Not Hispanic or Latino | DCM                            | 24.00% | 1    |
| 505 | 61.9 | Female | Asian            |     |          | Not Hispanic or Latino | DCM                            | 15.00% | 1.3  |
| 511 | 51.4 | Male   | White            |     |          | Not Hispanic or Latino | HCM                            | 59.50% | 1.3  |
| 512 | 24.2 | Male   | Other            |     |          | Hispanic or Latino     | HCM                            | 38.00% | 1.1  |
| 517 | 60.4 | Female | Asian            |     |          | Not Hispanic or Latino | HCM                            | 61.30% | 1    |
| 519 | 42.2 | Female | Other            |     | Filipino | Not Hispanic or Latino | Healthy Control                |        |      |
| 520 | 45.6 | Female | White            |     |          | Hispanic or Latino     | Healthy Control                |        |      |
| 521 | 46.2 | Female | White            |     |          | Not Hispanic or Latino | Other (LQT)                    |        |      |
| 522 | 1.0  | Male   | White            |     |          | Not Hispanic or Latino | Healthy Control                |        |      |
| 523 | 46.5 | Male   | White            |     |          | Not Hispanic or Latino | Healthy Control                |        |      |
| 524 | 11.1 | Male   | White            |     |          | Not Hispanic or Latino | Healthy Control                |        |      |
| 525 | 7.8  | Male   | White            |     |          | Not Hispanic or Latino | Healthy Control                |        |      |
| 526 | 9.8  | Male   | White            |     |          | Not Hispanic or Latino | Healthy Control                |        |      |
| 530 | 56.2 | Male   | White            |     |          | Not Hispanic or Latino | HCM                            | 65.00% |      |
| 532 | 58.7 | Male   | White            |     |          | Not Hispanic or Latino | HCM                            | 74.90% | 1.8  |
| 534 | 45.9 | Female | Asian            |     |          | Not Hispanic or Latino | HCM                            | 70.00% | 0.72 |
| 535 | 52.4 | Male   | Asian            |     |          | Not Hispanic or Latino | DCM                            | 25.00% | 0.88 |
| 539 | 42.6 | Female | Asian            | Yes |          | Not Hispanic or Latino | DCM                            | 50.10% | 1.1  |
| 540 | 65.1 | Male   | White            |     |          | Not Hispanic or Latino | HCM                            | 55.20% | 1.9  |
| 541 | 31.2 | Male   | White            |     |          | Not Hispanic or Latino | DCM                            | 31.00% | 0.62 |
| 543 | 74.5 | Male   | White            |     |          | Not Hispanic or Latino | HCM                            | 65.00% | 1.6  |
| 544 | 55.8 | Male   | White            |     |          | Not Hispanic or Latino | HCM (not clinically diagnosed) | 69.00% | 1.8  |
| 545 | 67.1 | Female | White            |     |          | Not Hispanic or Latino | HCM                            |        | 2.1  |
| 546 | 44.9 | Female | White            |     |          | Not Hispanic or Latino | HCM                            | 63.20% | 2.1  |
| 547 | 83.1 | Female | Other            |     | Filipino | Not Hispanic or Latino | HCM                            | 62.00% | 1.5  |
| 548 | 44.2 | Male   | White            |     |          | Not Hispanic or Latino | HCM                            | 62.60% | 1.6  |
| 549 | 59.6 | Male   | White            |     |          | Not Hispanic or Latino | HCM                            | 61.00% | 1.2  |
| 550 | 60.1 | Male   | White            |     |          | Not Hispanic or Latino | HCM                            | 67.00% | 1.2  |
| 551 | 18.3 | Male   | White            |     |          | Not Hispanic or Latino | DCM                            | 35.40% | 0.88 |
| 552 | 72.2 | Female | White            |     |          | Not Hispanic or Latino | Other (Fabry)                  | 78.00% |      |
| 553 | 60.0 | Male   | Asian            | Yes |          | Not Hispanic or Latino | HCM                            | 56.10% | 1.4  |
| 555 | 68.9 | Male   | Other            |     | Filipino | Not Hispanic or Latino | HCM                            | 70.00% | 1.5  |
| 556 | 51.2 | Male   | Asian            |     |          | Not Hispanic or Latino | HCM                            | 59.00% | 0.97 |
| 557 | 46.5 | Female | White            |     |          | Not Hispanic or Latino | Healthy Control                |        |      |
| 558 | 47.1 | Male   | White            |     |          | Not Hispanic or Latino | Healthy Control                |        |      |
| 559 | 8.9  | Female | White            |     |          | Not Hispanic or Latino | Other                          |        |      |
| 560 | 12.0 | Male   | White            |     |          | Not Hispanic or Latino | Other                          |        |      |
| 561 | 16.9 | Female | White            |     |          | Not Hispanic or Latino | Healthy Control                |        |      |
| 562 | 27.7 | Male   | White            |     |          | Not Hispanic or Latino | HCM                            | 73.00% | 1.5  |
| 563 | 59.0 | Male   | White            |     |          | Not Hispanic or Latino | HCM                            | 57.50% | 1.8  |
| 564 | 37.7 | Female | Asian            |     |          | Not Hispanic or Latino | HCM                            | 60.30% | 2.7  |
| 565 | 37.3 | Male   | Other            |     |          | Hispanic or Latino     | HCM                            | 56.90% | 1.5  |
| 566 | 45.9 | Male   | African American |     |          | Not Hispanic or Latino | HCM                            | 57.20% | 2.4  |
| 567 | 72.0 | Female | White            |     |          | Not Hispanic or Latino | HCM                            | 68.80% | 1.2  |
| 568 | 62.8 | Female | Other            |     |          | Hispanic or Latino     | HCM                            | 50.30% |      |
| 569 | 87.6 | Female | White            |     |          | Not Hispanic or Latino | HCM                            | 51.60% | 2.1  |
| 570 | 79.6 | Female | White            |     |          | Not Hispanic or Latino | HCM                            | 67.00% | 2.1  |
| 571 | 72.0 | Female | Native American  |     |          | Hispanic or Latino     | HCM                            | 58.40% | 1.7  |
| 574 | 60.7 | Female | White            |     |          | Not Hispanic or Latino | DCM                            | 45.00% | 0.79 |
| 576 | 87.1 | Female | White            |     |          | Not Hispanic or Latino | HCM                            | 59.40% | 1.7  |
| 578 | 73.5 | Male   | White            |     |          | Not Hispanic or Latino | HCM                            | 72.00% | 1.5  |
| 581 | 61.3 | Female | White            |     |          | Not Hispanic or Latino | HCM                            |        |      |
| 582 | 57.9 | Male   | Asian            | Yes |          | Not Hispanic or Latino | HCM                            |        |      |
| 586 | 56.4 | Female | White            |     |          | Not Hispanic or Latino | DCM                            | 52.60% | 0.94 |
| 591 | 24.4 | Female | White            |     |          | Not Hispanic or Latino | HCM                            | 67.60% | 1    |
| 592 | 55.2 | Male   | White            |     |          | Not Hispanic or Latino | HCM                            | 64.30% | 1.7  |
| 593 | 28.7 | Male   | White            |     |          | Not Hispanic or Latino | HCM                            | 55.60% | 0.81 |
| 596 | 38.7 | Male   | White            |     |          | Not Hispanic or Latino | DCM                            | 56.00% | 0.89 |
| 598 | 65.7 | Female | Other            |     |          | Hispanic or Latino     | HCM                            | 66.20% | 1.6  |
| 599 | 71.7 | Female | White            |     |          | Not Hispanic or Latino | HCM                            | 65.00% | 2.3  |
| 601 | 36.8 | Male   | White            |     |          | Not Hispanic or Latino | DCM                            | 29.60% | 0.86 |
| 603 | 32.5 | Male   | White            |     |          | Not Hispanic or Latino | HCM (not clinically diagnosed) | 65.60% | 2.1  |

|     |      |        |                  |  |                                                                        |                        |                                 |        |      |
|-----|------|--------|------------------|--|------------------------------------------------------------------------|------------------------|---------------------------------|--------|------|
| 605 | 56.7 | Male   | African American |  |                                                                        | Not Hispanic or Latino | DCM                             | 35.20% | 0.78 |
| 607 | 44.2 | Male   | Other            |  | Maternal European ancestry, paternal Egyptian ancestry                 | Not Hispanic or Latino | HCM                             | 66.10% | 1.7  |
| 612 | 69.3 | Male   | White            |  |                                                                        | Not Hispanic or Latino | HCM                             |        | 2    |
| 613 | 34.9 | Male   | White            |  |                                                                        | Not Hispanic or Latino | HCM                             |        | 2    |
| 614 | 82.0 | Female | White            |  |                                                                        | Not Hispanic or Latino | HCM                             | 70.70% | 2    |
| 615 | 29.1 | Female | White            |  |                                                                        | Not Hispanic or Latino | Healthy Control                 |        |      |
| 618 | 55.1 | Male   | White            |  |                                                                        | Not Hispanic or Latino | HCM                             | 58.50% | 2.9  |
| 619 | 48.4 | Male   | African American |  |                                                                        | Not Hispanic or Latino | HCM                             | 67.90% | 1.5  |
| 621 | 36.4 | Male   | White            |  |                                                                        | Not Hispanic or Latino | Healthy Control                 |        |      |
| 622 | 58.6 | Male   | White            |  |                                                                        | Not Hispanic or Latino | HCM                             | 30.80% | 1.5  |
| 624 | 45.7 | Female | White            |  |                                                                        | Not Hispanic or Latino | DCM                             | 35.20% | 1.1  |
| 625 | 51.3 | Male   | Other            |  | Paternal ancestry: Native American, Black; maternal ancestry: European | Not Hispanic or Latino | HCM                             | 72.00% | 2.1  |
| 628 | 54.2 | Female | White            |  |                                                                        | Not Hispanic or Latino | DCM                             | 45.00% | 0.97 |
| 629 | 25.7 | Male   | White            |  |                                                                        | Not Hispanic or Latino | LVNC (not clinically diagnosed) | 71.00% |      |
| 632 | 29.8 | Male   | White            |  |                                                                        | Not Hispanic or Latino | Healthy Control                 |        |      |
| 634 | 54.2 | Male   | Other            |  |                                                                        | Hispanic or Latino     | HCM                             | 73.90% | 1.6  |
| 638 | 29.0 | Female | Asian            |  |                                                                        | Not Hispanic or Latino | HCM                             | 75.00% | 1.7  |
| 643 | 60.1 | Male   | Asian            |  |                                                                        | Not Hispanic or Latino | DCM                             | 37.00% | 0.99 |
| 645 | 48.9 | Male   | White            |  |                                                                        | Not Hispanic or Latino | HCM                             | 67.70% | 1.5  |
| 649 | 63.5 | Female | White            |  |                                                                        | Not Hispanic or Latino | HCM                             | 31.50% | 1.4  |
| 650 | 46.9 | Female | White            |  |                                                                        | Unknown                | DCM                             | 45.40% | 0.7  |
| 653 | 53.6 | Male   | White            |  |                                                                        | Not Hispanic or Latino | HCM                             |        |      |
| 656 | 70.0 | Female | White            |  |                                                                        | Not Hispanic or Latino | HCM                             | 55.80% | 1.2  |
| 657 | 57.9 | Male   | White            |  |                                                                        | Not Hispanic or Latino | HCM                             | 55.50% | 1.3  |
| 658 | 61.0 | Female | White            |  |                                                                        | Not Hispanic or Latino | LVNC (not clinically diagnosed) | 47.70% | 0.78 |
| 659 | 59.5 | Female | African American |  |                                                                        | Not Hispanic or Latino | HCM                             | 60.20% | 1.9  |
| 662 | 30.2 | Male   | White            |  |                                                                        | Not Hispanic or Latino | HCM                             | 45.60% | 1.5  |
| 668 | 51.2 | Male   | White            |  |                                                                        | Not Hispanic or Latino | DCM                             | 25.00% | 1.2  |
| 673 | 58.9 | Female | Other            |  |                                                                        | Hispanic or Latino     | HCM                             | 65.90% | 1.5  |
| 676 | 55.4 | Female | Other            |  |                                                                        | Hispanic or Latino     | HCM                             | 71.00% | 0.02 |
| 677 | 26.9 | Male   | White            |  |                                                                        | Not Hispanic or Latino | DCM                             | 50.60% | 0.77 |
| 684 | 27.8 | Male   | Asian            |  |                                                                        | Not Hispanic or Latino | LVNC                            | 42.70% | 0.64 |
| 686 | 50.8 | Female | White            |  |                                                                        | Not Hispanic or Latino | HCM                             |        | 1.4  |
| 693 | 22.9 | Male   | White            |  |                                                                        | Not Hispanic or Latino | HCM                             | 62.10% | 2.5  |
| 697 | 24.7 | Male   | White            |  |                                                                        | Not Hispanic or Latino | HCM                             | 78.60% | 1.9  |
| 709 | 59.9 | Female | White            |  |                                                                        | Not Hispanic or Latino | DCM                             | 17.00% | 0.89 |
| 710 | 27.5 | Male   | Asian            |  |                                                                        | Not Hispanic or Latino | DCM                             | 20.30% | 1.1  |
| 711 | 67.3 | Female | White            |  |                                                                        | Not Hispanic or Latino | HCM                             | 65.90% | 1.5  |
| 712 | 72.5 | Female | White            |  |                                                                        | Not Hispanic or Latino | HCM                             | 74.70% | 1.8  |
| 715 | 59.8 | Female | White            |  |                                                                        | Not Hispanic or Latino | DCM                             | 37.20% | 1.2  |
| 721 | 46.3 | Male   | White            |  |                                                                        | Not Hispanic or Latino | DCM                             | 53.00% | 0.86 |
| 728 | 56.7 | Female | White            |  |                                                                        | Not Hispanic or Latino | DCM                             | 63.70% | 0.86 |
| 731 | 45.9 | Male   | White            |  |                                                                        | Not Hispanic or Latino | Healthy Control                 |        |      |
| 732 | 22.1 | Male   | White            |  |                                                                        | Not Hispanic or Latino | Other                           |        |      |
| 733 | 71.3 | Female | White            |  |                                                                        | Not Hispanic or Latino | Other                           |        |      |
| 734 | 44.2 | Female | White            |  |                                                                        | Not Hispanic or Latino | Other                           |        |      |
| 735 | 17.0 | Male   | White            |  |                                                                        | Not Hispanic or Latino | Other                           |        |      |
| 738 | 73.5 | Female | White            |  |                                                                        | Not Hispanic or Latino | HCM                             | 64.90% | 1.8  |
| 741 | 55.8 | Male   | White            |  |                                                                        | Not Hispanic or Latino | DCM                             | 22.10% | 0.86 |
| 751 | 56.5 | Female | White            |  |                                                                        | Not Hispanic or Latino | DCM                             | 45.20% | 0.9  |
| 754 | 79.2 | Male   | White            |  |                                                                        | Not Hispanic or Latino | DCM                             | 26.70% | 0.93 |
| 766 | 35.4 | Female | White            |  |                                                                        | Not Hispanic or Latino | DCM                             | 40.60% | 1.1  |
| 769 | 39.8 | Female | White            |  |                                                                        | Not Hispanic or Latino | DCM                             | 44.90% | 0.7  |
| 772 | 49.2 | Male   | Other            |  |                                                                        | Hispanic or Latino     | DCM                             | 47.70% | 0.97 |
| 780 | 63.9 | Male   | African American |  |                                                                        | Not Hispanic or Latino | DCM                             | 50.00% | 1.2  |
| 783 | 81.7 | Female | White            |  |                                                                        | Not Hispanic or Latino | DCM                             | 27.10% | 0.76 |
| 787 | 52.0 | Female | African American |  |                                                                        | Not Hispanic or Latino | DCM                             | 23.80% | 1.3  |
| 788 | 56.2 | Male   | White            |  |                                                                        | Not Hispanic or Latino | DCM                             | 22.10% | 0.67 |
| 793 | 77.0 | Male   | White            |  |                                                                        | Not Hispanic or Latino | LVNC (not clinically diagnosed) | 66.50% | 1.4  |

|     |      |        |                  |     |             |                        |                                |        |      |
|-----|------|--------|------------------|-----|-------------|------------------------|--------------------------------|--------|------|
| 794 | 62.3 | Female | White            |     |             | Not Hispanic or Latino | LVNC                           | 54.60% | 0.85 |
| 799 | 36.6 | Male   | White            |     |             | Not Hispanic or Latino | LVNC                           | 68.90% | 0.95 |
| 803 | 28.5 | Male   | White            |     |             | Not Hispanic or Latino | LVNC                           | 43.20% | 0.71 |
| 808 | 38.2 | Female | White            |     |             | Not Hispanic or Latino | LVNC                           | 37.80% | 0.6  |
| 811 | 19.7 | Female | White            |     |             | Not Hispanic or Latino | DCM (not clinically diagnosed) | 64.90% | 0.89 |
| 813 | 49.6 | Female | White            |     |             | Not Hispanic or Latino | DCM                            | 30.10% | 0.82 |
| 814 | 62.2 | Male   | White            |     |             | Not Hispanic or Latino | DCM                            | 55.50% | 1.1  |
| 815 | 41.9 | Male   | White            |     |             | Not Hispanic or Latino | DCM                            | 51.70% | 0.93 |
| 817 | 65.8 | Male   | Other            |     |             | Hispanic or Latino     | DCM                            | 64.90% | 1.1  |
| 820 | 50.0 | Male   | White            |     |             | Not Hispanic or Latino | Healthy Control                |        |      |
| 821 | 68.4 | Female | African American |     |             | Not Hispanic or Latino | Healthy Control                |        |      |
| 822 | 62.1 | Female | White            |     |             | Not Hispanic or Latino | Healthy Control                |        |      |
| 823 | 62.3 | Female | White            |     |             | Not Hispanic or Latino | Healthy Control                |        |      |
| 827 | 58.0 | Female | White            |     |             | Not Hispanic or Latino | Healthy Control                |        |      |
| 839 | 55.0 | Male   | Asian            | Yes |             | Not Hispanic or Latino | Healthy Control                |        |      |
| 844 | 36.3 | Male   | African American |     |             | Not Hispanic or Latino | DCM                            | 16.80% | 1.2  |
| 851 | 57.7 | Female | White            |     |             | Not Hispanic or Latino | DCM                            | 20.10% | 1    |
| 852 | 38.2 | Female | Unknown          |     |             | Unknown                | DCM                            | 34.10% | 1    |
| 854 | 62.2 | Female | Other            |     |             | Hispanic or Latino     | Healthy Control                |        |      |
| 855 | 52.2 | Female | White            |     |             | Not Hispanic or Latino | Healthy Control                |        |      |
| 856 | 63.2 | Female | Other            |     |             | Hispanic or Latino     | Healthy Control                |        |      |
| 857 | 62.4 | Male   | Asian            |     |             | Not Hispanic or Latino | Healthy Control                |        |      |
| 860 | 53.6 | Male   | Asian            |     |             | Not Hispanic or Latino | Healthy Control                |        |      |
| 861 | 49.4 | Female | White            |     |             | Not Hispanic or Latino | Healthy Control                |        |      |
| 862 | 65.4 | Male   | White            |     |             | Not Hispanic or Latino | Healthy Control                |        |      |
| 868 | 55.0 | Female | Other            |     |             | Hispanic or Latino     | Healthy Control                |        |      |
| 869 | 53.0 | Female | White            |     |             | Not Hispanic or Latino | Healthy Control                |        |      |
| 875 | 36.8 | Female | Other            |     |             | Not Hispanic or Latino | DCM                            | 62.40% | 0.9  |
| 885 | 46.9 | Male   | White            |     |             | Not Hispanic or Latino | Healthy Control                |        |      |
| 886 | 5.4  | Male   | White            |     |             | Not Hispanic or Latino | DCM                            | 52.00% | 0.51 |
| 887 | 57.0 | Female | White            |     |             | Not Hispanic or Latino | LVNC                           | 42.10% | 0.89 |
| 888 | 55.1 | Female | Other            |     |             | Hispanic or Latino     | DCM (not clinically diagnosed) | 30.00% | 0.68 |
| 910 | 69.1 | Male   | White            |     |             | Not Hispanic or Latino | DCM                            | 28.70% | 1    |
| 912 | 53.9 | Male   | White            |     |             | Not Hispanic or Latino | DCM                            | 67.00% | 0.92 |
| 914 | 63.8 | Male   | African American |     |             | Not Hispanic or Latino | DCM                            | 18.90% | 0.8  |
| 915 | 63.4 | Male   | White            |     |             | Not Hispanic or Latino | DCM                            | 59.70% | 1.2  |
| 916 | 72.0 | Male   | Other            |     |             | Hispanic or Latino     | Other                          |        |      |
| 917 | 48.3 | Female | White            |     |             | Not Hispanic or Latino | DCM (not clinically diagnosed) | 64.90% | 0.88 |
| 919 | 62.2 | Male   | Asian            |     |             | Not Hispanic or Latino | Other                          |        |      |
| 920 | 43.0 | Male   | White            |     |             | Not Hispanic or Latino | DCM                            | 39.60% | 0.6  |
| 923 | 54.0 | Female | African American |     |             | Not Hispanic or Latino | Other                          |        |      |
| 925 | 25.7 | Male   | Asian            |     |             | Not Hispanic or Latino | DCM                            | 57.80% | 1.2  |
| 927 | 54.2 | Female | African American |     |             | Not Hispanic or Latino | Other                          |        |      |
| 928 | 73.8 | Female | Asian            | Yes |             | Not Hispanic or Latino | DCM                            | 38.90% | 0.75 |
| 930 | 58.2 | Male   | African American |     |             | Not Hispanic or Latino | Other                          |        |      |
| 931 | 68.1 | Male   | Other            |     |             | Hispanic or Latino     | Other                          |        |      |
| 932 | 48.0 | Female | White            |     |             | Not Hispanic or Latino | LVNC                           | 38.40% | 0.85 |
| 933 | 42.3 | Female | Asian            | Yes |             | Not Hispanic or Latino | Healthy Control                |        |      |
| 934 | 63.7 | Male   | Other            |     |             | Hispanic or Latino     | Other                          |        |      |
| 935 | 54.3 | Male   | Other            |     | Palestinian | Not Hispanic or Latino | DCM                            | 45.10% | 1.2  |
| 936 | 63.1 | Male   | African American |     |             | Not Hispanic or Latino | Other                          |        |      |
| 937 | 64.8 | Male   | White            |     |             | Not Hispanic or Latino | LVNC                           | 40.20% | 0.82 |
| 938 | 35.8 | Female | White            |     |             | Not Hispanic or Latino | DCM                            | 55.30% | 0.87 |
| 941 | 51.8 | Male   | Other            |     |             | Hispanic or Latino     | Other                          |        |      |
| 942 | 55.8 | Male   | Other            |     |             | Hispanic or Latino     | DCM                            | 28.00% | 1    |
| 944 | 46.9 | Male   | Asian            |     |             | Not Hispanic or Latino | Healthy Control                |        |      |
| 946 | 56.1 | Male   | Asian            | Yes |             | Not Hispanic or Latino | DCM                            | 21.80% | 1    |
| 950 | 55.8 | Male   | African American |     |             | Not Hispanic or Latino | Other                          |        |      |
| 954 | 55.7 | Female | Pacific Islander |     |             | Not Hispanic or Latino | DCM                            | 19.90% | 0.8  |
| 955 | 68.6 | Female | White            |     |             | Not Hispanic or Latino | Healthy Control                |        |      |
| 957 | 78.2 | Female | Other            |     |             | Hispanic or Latino     | DCM                            | 21.40% | 0.89 |
| 959 | 61.1 | Male   | Other            |     |             | Hispanic or Latino     | Other                          |        |      |

|      |      |        |                  |            |          |                        |                                |        |      |
|------|------|--------|------------------|------------|----------|------------------------|--------------------------------|--------|------|
| 960  | 65.3 | Male   | White            |            |          | Not Hispanic or Latino | Healthy Control                |        |      |
| 961  | 82.8 | Male   | Asian            |            |          | Not Hispanic or Latino | Other                          |        |      |
| 962  | 65.0 | Female | Asian            |            |          | Not Hispanic or Latino | Healthy Control                |        |      |
| 963  | 48.5 | Female | African American |            |          | Not Hispanic or Latino | DCM                            | 45.10% | 0.79 |
| 964  | 66.4 | Female | African American |            |          | Not Hispanic or Latino | Other                          |        |      |
| 965  | 61.1 | Female | White            |            |          | Not Hispanic or Latino | DCM                            | 45.40% | 1.1  |
| 967  | 60.1 | Female | Asian            |            |          | Not Hispanic or Latino | Healthy Control                |        |      |
| 969  | 42.9 | Female | African American |            |          | Not Hispanic or Latino | DCM (not clinically diagnosed) | 23.80% | 1    |
| 974  | 35.9 | Female | Other            |            |          | Hispanic or Latino     | DCM                            | 15.20% | 0.84 |
| 979  | 72.9 | Male   | Asian            |            |          | Not Hispanic or Latino | Other                          |        |      |
| 986  | 33.3 | Male   | White            |            |          | Not Hispanic or Latino | DCM                            | 40.10% | 0.88 |
| 989  | 49.6 | Female | Asian            |            |          | Not Hispanic or Latino | Healthy Control                |        |      |
| 990  | 57.2 | Female | Asian            |            |          | Not Hispanic or Latino | Healthy Control                |        |      |
| 991  | 59.9 | Male   | Asian            |            |          | Not Hispanic or Latino | Healthy Control                |        |      |
| 995  | 60.1 | Male   | White            |            |          | Not Hispanic or Latino | DCM                            | 63.30% | 0.82 |
| 1074 | 71.0 | Male   | White            |            |          | Not Hispanic or Latino | DCM                            |        |      |
| 2002 | 66.1 | Female | White            |            |          | Not Hispanic or Latino | Healthy Control                |        |      |
| 2003 | 80.4 | Female | Other            |            | Filipino | Not Hispanic or Latino | Healthy Control                |        |      |
| 2006 | 65.4 | Female | White            |            |          | Not Hispanic or Latino | DCM                            | 22.80% | 0.8  |
| 2007 | 71.7 | Male   | White            |            |          | Not Hispanic or Latino | DCM                            | 25.00% | 0.9  |
| 2009 | 36.0 | Male   | Asian            | Yes        |          | Not Hispanic or Latino | Healthy Control                |        |      |
| 2012 | 63.9 | Female | White            |            |          | Not Hispanic or Latino | DCM                            | 17.70% | 1.3  |
| 2013 | 70.3 | Male   | White            |            |          | Not Hispanic or Latino | Healthy Control                |        |      |
| 2015 | 51.1 | Female | Native Hawaiian  |            |          | Not Hispanic or Latino | DCM                            | 55.90% | 1.6  |
| 2020 | 54.5 | Female | White            |            |          | Not Hispanic or Latino | DCM                            | 50.10% | 0.81 |
| 2025 | 37.9 | Male   | White            |            |          | Not Hispanic or Latino | DCM                            | 59.30% | 0.97 |
| 2032 | 65.1 | Female | Asian            |            |          | Not Hispanic or Latino | Other                          |        |      |
| 2035 | 78.9 | Male   | Asian            |            |          | Not Hispanic or Latino | Other                          |        |      |
| 2036 | 23.8 | Male   | White            |            |          | Not Hispanic or Latino | DCM                            | 50.20% | 0.78 |
| 2038 | 61.8 | Female | White            |            |          | Not Hispanic or Latino | Healthy Control                |        |      |
| 2039 | 60.9 | Male   | White            |            |          | Not Hispanic or Latino | DCM                            | 36.40% | 0.91 |
| 2051 | 69.8 | Male   | Asian            |            |          | Not Hispanic or Latino | Other                          |        |      |
| 2055 | 53.9 | Male   | White            |            |          | Not Hispanic or Latino | Healthy Control                |        |      |
| 2059 | 37.4 | Male   | Other            |            |          | Hispanic or Latino     | DCM                            | 23.30% | 1    |
| 2061 | 79.6 | Male   | Asian            |            |          | Not Hispanic or Latino | Other                          |        |      |
| 2062 | 47.6 | Male   | Asian            | Yes        |          | Not Hispanic or Latino | DCM                            | 24.20% | 0.8  |
| 2063 | 56.5 | Male   | Other            |            |          | Hispanic or Latino     | Other                          |        |      |
| 2064 | 29.1 | Male   | African American |            |          | Not Hispanic or Latino | LVNC                           | 68.60% | 1    |
| 2065 | 52.1 | Male   | Asian            |            |          | Not Hispanic or Latino | Other                          |        |      |
| 2073 | 54.7 | Male   | White            |            |          | Not Hispanic or Latino | Healthy Control                |        |      |
| 2086 | 67.7 | Male   | White            |            |          | Not Hispanic or Latino | Healthy Control                |        |      |
| 2136 | 50.8 | Female | White            |            |          | Not Hispanic or Latino | Healthy Control                |        |      |
| 2137 | 51.1 | Male   | White            |            |          | Not Hispanic or Latino | Healthy Control                |        |      |
| 2138 | 20.5 | Male   | White            |            |          | Not Hispanic or Latino | Healthy Control                |        |      |
| 2156 | 62.0 | Female | White            |            |          | Not Hispanic or Latino | Other                          |        |      |
| 2157 | 66.0 | Male   | Asian            | East Asian |          | Not Hispanic or Latino | Other                          |        |      |
| 2159 | 23.7 | Female | White            |            |          | Not Hispanic or Latino | Healthy Control                |        |      |
| 2161 | 63.0 | Male   | Asian            | East Asian |          | Not Hispanic or Latino | Other                          |        |      |
| 2162 | 60.0 | Female | Asian            | East Asian |          | Not Hispanic or Latino | Other                          |        |      |
| 2163 | 62.0 | Female | Asian            | East Asian |          | Not Hispanic or Latino | Other                          |        |      |
| 2167 | 57.1 | Male   | White            |            |          | Not Hispanic or Latino | Healthy Control                |        |      |
| 2184 | 27.3 | Male   | White            |            |          | Not Hispanic or Latino | Healthy Control                |        |      |
| 2186 | 25.2 | Female | Other            |            |          | Hispanic or Latino     | Healthy Control                |        |      |
| 2189 | 66.0 | Female | Asian            | East Asian |          | Not Hispanic or Latino | Healthy Control                |        |      |
| 2194 | 73.0 | Female | Asian            | East Asian |          | Not Hispanic or Latino | Healthy Control                |        |      |
| 2197 | 49.0 | Male   | Asian            | East Asian |          |                        | Healthy Control                |        |      |
| 2198 | 43.0 | Female | Asian            | East Asian |          | Not Hispanic or Latino | Healthy Control                |        |      |

| <b>Table S2</b>              |         |      |      |
|------------------------------|---------|------|------|
| Parameter                    | Average | Min  | Max  |
| Total SNPs+Indels (millions) | 4.28    | 4.14 | 5.14 |
| TiTv dbSNP                   | 2.11    | 2.1  | 2.11 |
| TiTv novel                   | 1.23    | 1.16 | 1.32 |
| Ins/Del dbSNP                | 0.89    | 0.88 | 0.9  |
| Ins/Del novel                | 0.65    | 0.62 | 0.71 |
| SNP reference bias           | 0.54    | 0.53 | 0.55 |
| Coverage                     | 28.2    | 18.2 | 44.1 |

Table S3

| Sample | Mean Coverage | TOTAL_SNPS | TOTAL_INDELS | TOTAL SNPS+INDELS | DBSNP_TITV | NOVEL_TITV | DBSNP_INS_DEL_RA | NOVEL_INS_DEL_RA | SNP_REFERENCE_BIAS |
|--------|---------------|------------|--------------|-------------------|------------|------------|------------------|------------------|--------------------|
| 67     | 25.44         | 3865486    | 388247       | 4.253733          | 2.107593   | 1.23858    | 0.890661         | 0.638943         | 0.537844           |
| 70     | 23.19         | 3828412    | 382274       | 4.210686          | 2.106071   | 1.228261   | 0.891072         | 0.644689         | 0.534503           |
| 283    | 36.17         | 3829867    | 380709       | 4.210576          | 2.110035   | 1.200518   | 0.894566         | 0.643686         | 0.54179            |
| 284    | 31.89         | 3871754    | 386279       | 4.258033          | 2.107034   | 1.227879   | 0.889223         | 0.653137         | 0.537624           |
| 287    | 34.52         | 3882478    | 386449       | 4.268927          | 2.105272   | 1.242289   | 0.892151         | 0.647025         | 0.538323           |
| 289    | 37.34         | 3857871    | 383927       | 4.241798          | 2.10567    | 1.23896    | 0.890383         | 0.651265         | 0.538698           |
| 295    | 29.57         | 3796688    | 377214       | 4.173902          | 2.107108   | 1.240403   | 0.888625         | 0.64378          | 0.537759           |
| 297    | 31.98         | 3809100    | 380368       | 4.189468          | 2.104918   | 1.239576   | 0.891807         | 0.637438         | 0.536682           |
| 298    | 37.4          | 3876330    | 386103       | 4.262433          | 2.106327   | 1.249724   | 0.891905         | 0.650325         | 0.539467           |
| 301    | 35.73         | 3851380    | 384547       | 4.235927          | 2.106246   | 1.212786   | 0.894259         | 0.631118         | 0.540042           |
| 304    | 27.54         | 3829586    | 381061       | 4.210647          | 2.108784   | 1.202409   | 0.892226         | 0.641577         | 0.539387           |
| 310    | 30.35         | 4567574    | 466073       | 5.033647          | 2.108913   | 1.305366   | 0.901376         | 0.692395         | 0.533929           |
| 319    | 33.7          | 3842382    | 384319       | 4.226701          | 2.105461   | 1.225773   | 0.888295         | 0.647666         | 0.539921           |
| 320    | 27.66         | 3828211    | 381067       | 4.209278          | 2.107453   | 1.208738   | 0.89129          | 0.631135         | 0.537449           |
| 333    | 33.08         | 3846001    | 385641       | 4.231642          | 2.105652   | 1.217931   | 0.889489         | 0.639115         | 0.536976           |
| 334    | 26.94         | 4539149    | 459202       | 4.998351          | 2.108793   | 1.274533   | 0.900696         | 0.692829         | 0.539129           |
| 338    | 25.41         | 3771298    | 376690       | 4.147988          | 2.107833   | 1.231012   | 0.892455         | 0.665522         | 0.538626           |
| 352    | 27.69         | 3851862    | 382114       | 4.233976          | 2.110064   | 1.223389   | 0.891415         | 0.65331          | 0.540764           |
| 356    | 26.48         | 3817058    | 380414       | 4.197472          | 2.108222   | 1.215969   | 0.894968         | 0.643274         | 0.541525           |
| 358    | 26.88         | 3830591    | 381725       | 4.212316          | 2.105795   | 1.212063   | 0.893891         | 0.652212         | 0.541063           |
| 367    | 24.63         | 3883036    | 387434       | 4.27047           | 2.107139   | 1.244366   | 0.894333         | 0.649871         | 0.541837           |
| 371    | 31.33         | 3806069    | 377211       | 4.18328           | 2.107589   | 1.202123   | 0.891575         | 0.634756         | 0.539503           |
| 372    | 29            | 3838397    | 380415       | 4.218812          | 2.107548   | 1.230043   | 0.89707          | 0.63331          | 0.541775           |
| 373    | 28.9          | 3810013    | 382101       | 4.192114          | 2.1009     | 1.25359    | 0.895177         | 0.653            | 0.540677           |
| 374    | 25.36         | 3803379    | 378204       | 4.181583          | 2.109199   | 1.2174     | 0.893731         | 0.633373         | 0.543782           |
| 375    | 28.2          | 3815187    | 380136       | 4.195323          | 2.105844   | 1.218664   | 0.891363         | 0.655241         | 0.540591           |
| 376    | 24.96         | 3808029    | 380024       | 4.188053          | 2.109415   | 1.185671   | 0.890712         | 0.640431         | 0.539756           |
| 378    | 26.11         | 3809831    | 380944       | 4.190775          | 2.10438    | 1.234936   | 0.897818         | 0.660326         | 0.542999           |
| 379    | 25.74         | 3816406    | 379607       | 4.196013          | 2.106534   | 1.206741   | 0.893598         | 0.646443         | 0.54365            |
| 380    | 33.5          | 3799298    | 377974       | 4.177272          | 2.106133   | 1.215582   | 0.891763         | 0.634943         | 0.5418             |
| 386    | 25.81         | 3862996    | 385764       | 4.24876           | 2.103686   | 1.225071   | 0.892932         | 0.654074         | 0.540708           |
| 388    | 36.7          | 3859489    | 387226       | 4.246715          | 2.107124   | 1.216851   | 0.889108         | 0.642081         | 0.540811           |
| 390    | 26.19         | 3818074    | 381305       | 4.199379          | 2.105701   | 1.203953   | 0.891328         | 0.645467         | 0.541641           |
| 393    | 28.07         | 3789902    | 377128       | 4.16703           | 2.1074     | 1.200328   | 0.892675         | 0.630952         | 0.541161           |
| 394    | 27.21         | 4442563    | 448050       | 4.890613          | 2.107751   | 1.256437   | 0.897492         | 0.68364          | 0.533704           |
| 395    | 26.19         | 3827900    | 381402       | 4.209302          | 2.106218   | 1.212087   | 0.892995         | 0.651665         | 0.542105           |
| 397    | 33.93         | 3824652    | 385079       | 4.209731          | 2.100397   | 1.237899   | 0.895077         | 0.63608          | 0.538475           |
| 398    | 27.85         | 3822294    | 386824       | 4.209118          | 2.102102   | 1.219922   | 0.897102         | 0.638609         | 0.538087           |
| 399    | 27.21         | 4443232    | 447455       | 4.890687          | 2.110574   | 1.270187   | 0.894918         | 0.681006         | 0.531214           |
| 405    | 26.84         | 3831139    | 381983       | 4.213122          | 2.108506   | 1.210883   | 0.895527         | 0.63806          | 0.544523           |
| 411    | 25.99         | 3826925    | 382148       | 4.209073          | 2.107811   | 1.203943   | 0.892342         | 0.642667         | 0.539379           |
| 413    | 25.11         | 3893890    | 390137       | 4.284027          | 2.110658   | 1.238391   | 0.894336         | 0.646681         | 0.537091           |
| 415    | 26.3          | 3783216    | 377237       | 4.160453          | 2.104172   | 1.247392   | 0.896798         | 0.649642         | 0.545155           |
| 419    | 28.22         | 3838520    | 384924       | 4.223444          | 2.105307   | 1.235152   | 0.89693          | 0.647422         | 0.540715           |
| 420    | 28.13         | 3801878    | 380055       | 4.181933          | 2.111993   | 1.211612   | 0.896068         | 0.644403         | 0.538099           |
| 421    | 23.18         | 3803803    | 381998       | 4.185801          | 2.109551   | 1.207608   | 0.893596         | 0.642835         | 0.541241           |
| 428    | 25.13         | 3828988    | 383660       | 4.212648          | 2.105813   | 1.205958   | 0.892658         | 0.652015         | 0.543261           |
| 431    | 29.15         | 3807726    | 380675       | 4.188401          | 2.104029   | 1.194757   | 0.894054         | 0.639604         | 0.542527           |
| 437    | 21.86         | 3826730    | 385295       | 4.212025          | 2.102667   | 1.270204   | 0.89772          | 0.64711          | 0.544585           |
| 438    | 25.97         | 3767731    | 378286       | 4.146017          | 2.106493   | 1.215289   | 0.888435         | 0.635732         | 0.539752           |
| 440    | 30.63         | 3805329    | 383152       | 4.188481          | 2.107261   | 1.203936   | 0.890269         | 0.641613         | 0.542092           |
| 485    | 25.05         | 3802239    | 377851       | 4.18009           | 2.105147   | 1.216388   | 0.890806         | 0.63851          | 0.541127           |
| 487    | 26.49         | 3834297    | 381940       | 4.216237          | 2.110778   | 1.209485   | 0.892065         | 0.643414         | 0.539073           |
| 489    | 28.03         | 3790860    | 381810       | 4.17267           | 2.107582   | 1.207447   | 0.889059         | 0.649689         | 0.540451           |
| 493    | 29.53         | 3822639    | 382163       | 4.204802          | 2.108175   | 1.214611   | 0.892799         | 0.641319         | 0.539926           |
| 494    | 30.74         | 3851757    | 384228       | 4.235985          | 2.104174   | 1.208384   | 0.892503         | 0.664936         | 0.545395           |
| 495    | 28.13         | 3800731    | 379065       | 4.179796          | 2.103594   | 1.209282   | 0.891596         | 0.644301         | 0.540053           |
| 496    | 24.93         | 3835848    | 381616       | 4.217464          | 2.103464   | 1.224702   | 0.894555         | 0.64255          | 0.542548           |
| 501    | 26.79         | 3805984    | 379187       | 4.185171          | 2.108168   | 1.214124   | 0.895            | 0.646061         | 0.541465           |
| 502    | 28.38         | 3816016    | 379792       | 4.195808          | 2.109008   | 1.196669   | 0.89343          | 0.630074         | 0.541394           |
| 503    | 26.98         | 3812483    | 386036       | 4.198519          | 2.102646   | 1.238666   | 0.895694         | 0.660883         | 0.539001           |
| 505    | 28.62         | 3842253    | 384278       | 4.226531          | 2.102267   | 1.224656   | 0.898917         | 0.644978         | 0.541134           |
| 511    | 34.69         | 3814384    | 384474       | 4.198858          | 2.103256   | 1.201406   | 0.887418         | 0.659274         | 0.536799           |
| 512    | 29.19         | 4173092    | 422220       | 4.595312          | 2.106993   | 1.224877   | 0.895594         | 0.663914         | 0.538195           |
| 517    | 31.59         | 3850802    | 388315       | 4.239117          | 2.103965   | 1.22385    | 0.89824          | 0.654465         | 0.542618           |
| 519    | 30.23         | 3887689    | 390804       | 4.278493          | 2.107442   | 1.262333   | 0.898159         | 0.658905         | 0.543801           |
| 520    | 27.79         | 3820731    | 384084       | 4.204815          | 2.108835   | 1.206372   | 0.893628         | 0.658013         | 0.543652           |
| 521    | 26.95         | 3785202    | 380925       | 4.166127          | 2.107634   | 1.194008   | 0.893517         | 0.646585         | 0.545334           |

|     |       |         |        |          |          |          |          |          |          |
|-----|-------|---------|--------|----------|----------|----------|----------|----------|----------|
| 522 | 25.97 | 3836231 | 384139 | 4.22037  | 2.104721 | 1.158367 | 0.892003 | 0.637142 | 0.545678 |
| 523 | 27.82 | 3793839 | 382572 | 4.176411 | 2.107399 | 1.20372  | 0.892614 | 0.645277 | 0.542637 |
| 524 | 23.42 | 3830452 | 386266 | 4.216718 | 2.110057 | 1.225578 | 0.891775 | 0.65153  | 0.538526 |
| 525 | 27.54 | 3825651 | 385777 | 4.211428 | 2.107736 | 1.194155 | 0.891874 | 0.639347 | 0.537862 |
| 526 | 32.1  | 3850623 | 386808 | 4.237431 | 2.10756  | 1.200182 | 0.891663 | 0.654872 | 0.54312  |
| 530 | 24.96 | 3825035 | 384629 | 4.209664 | 2.107619 | 1.236389 | 0.892922 | 0.649051 | 0.539035 |
| 532 | 28.9  | 3834270 | 387925 | 4.222195 | 2.104662 | 1.222159 | 0.889006 | 0.650445 | 0.539012 |
| 534 | 30.94 | 3839582 | 387445 | 4.227027 | 2.100565 | 1.229256 | 0.894893 | 0.639619 | 0.545071 |
| 535 | 32.76 | 3830711 | 387805 | 4.218516 | 2.103791 | 1.211751 | 0.895592 | 0.647654 | 0.542611 |
| 539 | 26.84 | 3908943 | 395044 | 4.303987 | 2.104456 | 1.250362 | 0.890793 | 0.647418 | 0.539707 |
| 540 | 26.29 | 3816922 | 384730 | 4.201652 | 2.106054 | 1.226716 | 0.89269  | 0.658613 | 0.540805 |
| 541 | 22.95 | 3807942 | 384818 | 4.19276  | 2.106595 | 1.213495 | 0.895739 | 0.658285 | 0.536662 |
| 543 | 29.42 | 3860519 | 389094 | 4.249613 | 2.109464 | 1.282401 | 0.893189 | 0.673575 | 0.542947 |
| 544 | 32.85 | 3805785 | 383016 | 4.188801 | 2.104809 | 1.207845 | 0.890776 | 0.64982  | 0.542579 |
| 545 | 35.99 | 3897834 | 391611 | 4.289445 | 2.109452 | 1.213006 | 0.893553 | 0.645139 | 0.54324  |
| 546 | 32.86 | 3833700 | 385444 | 4.219144 | 2.107427 | 1.212437 | 0.891248 | 0.638137 | 0.539308 |
| 547 | 29.37 | 3909019 | 393870 | 4.302889 | 2.103948 | 1.25148  | 0.891123 | 0.63492  | 0.546762 |
| 548 | 34.24 | 3808719 | 382718 | 4.191437 | 2.105549 | 1.206377 | 0.892468 | 0.640486 | 0.542945 |
| 549 | 28.47 | 3817118 | 385032 | 4.20215  | 2.106903 | 1.220783 | 0.892073 | 0.652719 | 0.537423 |
| 550 | 25.21 | 3787803 | 380149 | 4.167952 | 2.105273 | 1.212243 | 0.891055 | 0.635496 | 0.539559 |
| 551 | 27.44 | 3795814 | 380273 | 4.176087 | 2.104869 | 1.205229 | 0.889416 | 0.632515 | 0.539188 |
| 552 | 26.03 | 3821429 | 383357 | 4.204786 | 2.108959 | 1.211425 | 0.891284 | 0.636873 | 0.542022 |
| 553 | 28.81 | 3893195 | 391950 | 4.285145 | 2.103827 | 1.235532 | 0.896148 | 0.641754 | 0.539449 |
| 555 | 23.57 | 3854511 | 385432 | 4.239943 | 2.10077  | 1.298928 | 0.896019 | 0.64874  | 0.542697 |
| 556 | 24.03 | 3781002 | 379775 | 4.160777 | 2.101626 | 1.254001 | 0.895576 | 0.635404 | 0.538869 |
| 557 | 24.06 | 3846542 | 385067 | 4.231609 | 2.105981 | 1.255402 | 0.887823 | 0.643221 | 0.545515 |
| 558 | 26.54 | 3803647 | 381289 | 4.184936 | 2.110767 | 1.20577  | 0.890883 | 0.633439 | 0.540937 |
| 559 | 23.18 | 3843252 | 384410 | 4.227662 | 2.110204 | 1.249361 | 0.887667 | 0.643555 | 0.542591 |
| 560 | 24.12 | 3790983 | 380042 | 4.171025 | 2.108526 | 1.215334 | 0.889465 | 0.627849 | 0.544148 |
| 561 | 26.93 | 3821394 | 384001 | 4.205395 | 2.107658 | 1.210161 | 0.892801 | 0.631184 | 0.541711 |
| 562 | 32.94 | 3848628 | 386667 | 4.235295 | 2.102583 | 1.206539 | 0.886982 | 0.638416 | 0.542396 |
| 563 | 29.79 | 3835231 | 384125 | 4.219356 | 2.107384 | 1.20587  | 0.891102 | 0.633974 | 0.540726 |
| 564 | 25.86 | 3910750 | 394413 | 4.305163 | 2.10601  | 1.247344 | 0.892693 | 0.640235 | 0.540474 |
| 565 | 26.25 | 3904871 | 392755 | 4.297626 | 2.105643 | 1.233533 | 0.892223 | 0.648475 | 0.536367 |
| 566 | 29.9  | 4481349 | 458166 | 4.939515 | 2.104717 | 1.273546 | 0.900365 | 0.698483 | 0.536503 |
| 567 | 27.28 | 3868075 | 388503 | 4.256578 | 2.105942 | 1.221261 | 0.888441 | 0.625881 | 0.538438 |
| 568 | 23.09 | 3927390 | 393885 | 4.321275 | 2.108249 | 1.246773 | 0.892455 | 0.642471 | 0.535475 |
| 569 | 33.36 | 3882393 | 387339 | 4.269732 | 2.10757  | 1.238163 | 0.893834 | 0.646267 | 0.541069 |
| 570 | 23.41 | 3859167 | 386966 | 4.246133 | 2.109229 | 1.251372 | 0.89511  | 0.633816 | 0.538878 |
| 571 | 23.01 | 3890722 | 390868 | 4.28159  | 2.105344 | 1.243896 | 0.892582 | 0.639692 | 0.542237 |
| 574 | 35.09 | 3825306 | 384523 | 4.209829 | 2.105436 | 1.204961 | 0.892018 | 0.649255 | 0.54006  |
| 576 | 26.78 | 3877799 | 387132 | 4.264931 | 2.11033  | 1.223344 | 0.895579 | 0.649503 | 0.537401 |
| 578 | 27.59 | 3857943 | 390520 | 4.248463 | 2.109807 | 1.241243 | 0.891085 | 0.651591 | 0.539558 |
| 581 | 32.45 | 3842893 | 385223 | 4.228116 | 2.110049 | 1.232327 | 0.89504  | 0.64782  | 0.538189 |
| 582 | 22.6  | 3875823 | 389128 | 4.264951 | 2.105326 | 1.234633 | 0.893575 | 0.638391 | 0.537623 |
| 586 | 25.58 | 3910729 | 391649 | 4.302378 | 2.106296 | 1.225464 | 0.890934 | 0.636839 | 0.540722 |
| 591 | 42.27 | 3854850 | 385403 | 4.240253 | 2.102411 | 1.189051 | 0.887279 | 0.620887 | 0.543314 |
| 592 | 23.64 | 3771960 | 377880 | 4.14984  | 2.107221 | 1.200805 | 0.891639 | 0.63171  | 0.538138 |
| 593 | 29.8  | 3809639 | 382064 | 4.191703 | 2.104736 | 1.189447 | 0.889219 | 0.638838 | 0.542429 |
| 596 | 26.07 | 3812393 | 381623 | 4.194016 | 2.107019 | 1.236356 | 0.890694 | 0.638514 | 0.538522 |
| 598 | 25.2  | 3912782 | 391583 | 4.304365 | 2.10516  | 1.277945 | 0.895017 | 0.646107 | 0.543212 |
| 599 | 29.29 | 3833225 | 386820 | 4.220045 | 2.106146 | 1.210429 | 0.889112 | 0.648225 | 0.543433 |
| 601 | 26.92 | 3819953 | 380441 | 4.200394 | 2.10799  | 1.230056 | 0.892585 | 0.642124 | 0.541883 |
| 603 | 30.27 | 3831902 | 382382 | 4.214284 | 2.106339 | 1.215151 | 0.894639 | 0.646612 | 0.539815 |
| 605 | 29.06 | 4510934 | 458461 | 4.969395 | 2.108411 | 1.285913 | 0.899328 | 0.687617 | 0.538074 |
| 607 | 26.73 | 3916564 | 390319 | 4.306883 | 2.108225 | 1.234554 | 0.891664 | 0.647615 | 0.535882 |
| 612 | 26.34 | 3784560 | 377544 | 4.162104 | 2.107633 | 1.217379 | 0.892541 | 0.639654 | 0.538223 |
| 613 | 28.5  | 3825515 | 385245 | 4.21076  | 2.108854 | 1.206779 | 0.890842 | 0.645852 | 0.541725 |
| 614 | 29.25 | 3856346 | 384836 | 4.241182 | 2.107023 | 1.211555 | 0.8931   | 0.654982 | 0.539638 |
| 615 | 28.35 | 3856744 | 388331 | 4.245075 | 2.107714 | 1.221741 | 0.89356  | 0.646838 | 0.543247 |
| 618 | 26.75 | 3839784 | 383804 | 4.223588 | 2.108727 | 1.216159 | 0.893379 | 0.644285 | 0.540514 |
| 619 | 26.18 | 4390841 | 442477 | 4.833318 | 2.109203 | 1.307434 | 0.904122 | 0.673301 | 0.534724 |
| 621 | 29.24 | 3812250 | 380176 | 4.192426 | 2.104332 | 1.19544  | 0.889541 | 0.639876 | 0.540797 |
| 622 | 44.08 | 3853677 | 385667 | 4.239344 | 2.106287 | 1.17681  | 0.892597 | 0.628101 | 0.53944  |
| 624 | 25.2  | 3913293 | 391243 | 4.304536 | 2.105206 | 1.23332  | 0.892238 | 0.647348 | 0.536931 |
| 625 | 32.01 | 4209477 | 422397 | 4.631874 | 2.107116 | 1.238076 | 0.891726 | 0.671096 | 0.534952 |
| 628 | 27.61 | 3824518 | 381317 | 4.205835 | 2.10537  | 1.199179 | 0.889969 | 0.643713 | 0.540393 |
| 629 | 27.53 | 3784588 | 377565 | 4.162153 | 2.108907 | 1.191896 | 0.89276  | 0.642813 | 0.541017 |
| 632 | 29.63 | 3770296 | 375701 | 4.145997 | 2.106126 | 1.201898 | 0.892774 | 0.650098 | 0.542592 |
| 634 | 29.12 | 3887804 | 387370 | 4.275174 | 2.107587 | 1.22666  | 0.895854 | 0.641691 | 0.5401   |

|     |       |         |        |          |          |          |          |          |          |
|-----|-------|---------|--------|----------|----------|----------|----------|----------|----------|
| 638 | 30.71 | 3835297 | 386434 | 4.221731 | 2.103132 | 1.24516  | 0.894849 | 0.629635 | 0.54072  |
| 643 | 26.08 | 3817469 | 381806 | 4.199275 | 2.10542  | 1.247206 | 0.895654 | 0.652053 | 0.544903 |
| 645 | 26.98 | 3834538 | 379705 | 4.214243 | 2.107282 | 1.228562 | 0.897472 | 0.649825 | 0.539896 |
| 649 | 26.23 | 3828762 | 381739 | 4.210501 | 2.110279 | 1.231667 | 0.89537  | 0.632459 | 0.539301 |
| 650 | 26.46 | 3833779 | 381343 | 4.215122 | 2.105403 | 1.22131  | 0.895253 | 0.635385 | 0.541663 |
| 653 | 26.7  | 3793193 | 378458 | 4.171651 | 2.109115 | 1.186682 | 0.894606 | 0.649128 | 0.540083 |
| 656 | 27.43 | 3843135 | 382379 | 4.225514 | 2.105129 | 1.188062 | 0.893282 | 0.625676 | 0.539161 |
| 657 | 40.27 | 3881205 | 384262 | 4.265467 | 2.107609 | 1.212607 | 0.895591 | 0.631509 | 0.541441 |
| 658 | 27.28 | 3836038 | 381958 | 4.217996 | 2.111441 | 1.199604 | 0.891239 | 0.645597 | 0.5383   |
| 659 | 32.03 | 4660964 | 477322 | 5.138286 | 2.108337 | 1.286658 | 0.896534 | 0.692436 | 0.535334 |
| 662 | 30.22 | 3804626 | 380418 | 4.185044 | 2.107186 | 1.206357 | 0.894023 | 0.636877 | 0.540741 |
| 668 | 27.79 | 3909008 | 389544 | 4.298552 | 2.108544 | 1.212731 | 0.894985 | 0.64117  | 0.540493 |
| 673 | 25.96 | 3902109 | 389966 | 4.292075 | 2.107548 | 1.231599 | 0.891815 | 0.642479 | 0.540487 |
| 676 | 32.43 | 3960817 | 395098 | 4.355915 | 2.104344 | 1.238416 | 0.893655 | 0.648337 | 0.541656 |
| 677 | 25.53 | 3793272 | 378370 | 4.171642 | 2.108459 | 1.211237 | 0.894156 | 0.64019  | 0.540349 |
| 684 | 27.57 | 3806731 | 380392 | 4.187123 | 2.102967 | 1.23109  | 0.895332 | 0.645529 | 0.542447 |
| 686 | 34.61 | 3871440 | 386493 | 4.257933 | 2.108428 | 1.203141 | 0.890061 | 0.645413 | 0.539228 |
| 693 | 31.75 | 3817961 | 385251 | 4.203212 | 2.105214 | 1.206914 | 0.891205 | 0.645446 | 0.541408 |
| 697 | 27.41 | 3802475 | 379793 | 4.182268 | 2.108186 | 1.216027 | 0.894134 | 0.64037  | 0.542827 |
| 709 | 25.88 | 3829984 | 381249 | 4.211233 | 2.106866 | 1.211807 | 0.892542 | 0.650972 | 0.540667 |
| 710 | 25.68 | 3794209 | 378589 | 4.172798 | 2.103474 | 1.245024 | 0.898944 | 0.643411 | 0.544585 |
| 711 | 29.43 | 3822856 | 382482 | 4.205338 | 2.106544 | 1.219798 | 0.887774 | 0.633657 | 0.54233  |
| 712 | 29.68 | 3839701 | 383224 | 4.222925 | 2.106655 | 1.206222 | 0.891059 | 0.632786 | 0.544616 |
| 715 | 25.72 | 3820932 | 379077 | 4.200009 | 2.109648 | 1.22381  | 0.896945 | 0.632976 | 0.53785  |
| 721 | 30.44 | 3802696 | 379282 | 4.181978 | 2.105902 | 1.219929 | 0.889961 | 0.636922 | 0.538213 |
| 728 | 26.28 | 3808330 | 378885 | 4.187215 | 2.105303 | 1.200984 | 0.89187  | 0.635124 | 0.540561 |
| 731 | 29.59 | 3814465 | 380187 | 4.194652 | 2.105844 | 1.193265 | 0.892704 | 0.640149 | 0.543361 |
| 732 | 32.93 | 3821945 | 382717 | 4.204662 | 2.103794 | 1.202808 | 0.890998 | 0.63874  | 0.541675 |
| 733 | 28.91 | 3822661 | 385138 | 4.207799 | 2.107165 | 1.203422 | 0.89008  | 0.648408 | 0.541821 |
| 734 | 26.79 | 3823773 | 385917 | 4.20969  | 2.107886 | 1.193524 | 0.890846 | 0.648085 | 0.541399 |
| 735 | 29.26 | 3787080 | 376863 | 4.163943 | 2.104602 | 1.18223  | 0.893065 | 0.643538 | 0.539439 |
| 738 | 26.47 | 3833706 | 381804 | 4.21551  | 2.105333 | 1.21321  | 0.893067 | 0.633539 | 0.542162 |
| 741 | 26.52 | 3773213 | 376201 | 4.149414 | 2.108472 | 1.202642 | 0.89286  | 0.645234 | 0.538942 |
| 751 | 26.93 | 3832555 | 380915 | 4.21347  | 2.105334 | 1.221458 | 0.891894 | 0.637425 | 0.540528 |
| 754 | 25.86 | 3777257 | 376101 | 4.153358 | 2.107428 | 1.186297 | 0.89243  | 0.632284 | 0.539684 |
| 766 | 26    | 3810414 | 378437 | 4.188851 | 2.108048 | 1.215452 | 0.890563 | 0.636882 | 0.545412 |
| 769 | 25.36 | 3850884 | 384403 | 4.235287 | 2.110066 | 1.217092 | 0.896717 | 0.634842 | 0.539603 |
| 772 | 27.12 | 3894285 | 390667 | 4.284952 | 2.108776 | 1.240082 | 0.891155 | 0.652184 | 0.539295 |
| 780 | 26.87 | 4355411 | 439259 | 4.79467  | 2.108996 | 1.25982  | 0.89713  | 0.689374 | 0.535491 |
| 783 | 28.96 | 3854184 | 385507 | 4.239691 | 2.109019 | 1.19946  | 0.891605 | 0.663109 | 0.54181  |
| 787 | 28.99 | 4565749 | 464826 | 5.030575 | 2.106888 | 1.274097 | 0.898159 | 0.688595 | 0.536379 |
| 788 | 28.75 | 3829166 | 383719 | 4.212885 | 2.108684 | 1.209587 | 0.898888 | 0.660521 | 0.53919  |
| 793 | 34.01 | 3825620 | 383923 | 4.209543 | 2.105314 | 1.201893 | 0.890046 | 0.663957 | 0.542139 |
| 794 | 27.43 | 3827898 | 380366 | 4.208264 | 2.106177 | 1.228077 | 0.889475 | 0.651323 | 0.540138 |
| 799 | 28.59 | 3811031 | 382141 | 4.193172 | 2.107031 | 1.202882 | 0.894151 | 0.668527 | 0.543686 |
| 803 | 29.5  | 3835116 | 383934 | 4.21905  | 2.105679 | 1.203638 | 0.895445 | 0.655018 | 0.539636 |
| 808 | 32.37 | 3853406 | 384938 | 4.238344 | 2.107079 | 1.199046 | 0.892463 | 0.648097 | 0.545236 |
| 811 | 26.86 | 3808075 | 379845 | 4.18792  | 2.106194 | 1.209609 | 0.890556 | 0.642831 | 0.544597 |
| 813 | 27.72 | 3824873 | 380710 | 4.205583 | 2.109501 | 1.210834 | 0.896081 | 0.633994 | 0.538786 |
| 814 | 26.12 | 3800165 | 384741 | 4.184906 | 2.103301 | 1.203481 | 0.886889 | 0.636498 | 0.54112  |
| 815 | 25.68 | 3772464 | 374962 | 4.147426 | 2.108308 | 1.205864 | 0.8938   | 0.642816 | 0.538434 |
| 817 | 25.74 | 3868590 | 385653 | 4.254243 | 2.109776 | 1.223976 | 0.892605 | 0.646127 | 0.540561 |
| 820 | 25.4  | 3837481 | 382680 | 4.220161 | 2.109411 | 1.25101  | 0.892965 | 0.667541 | 0.546537 |
| 821 | 29.58 | 4533284 | 461500 | 4.994784 | 2.108013 | 1.286832 | 0.896515 | 0.683479 | 0.533349 |
| 822 | 28.03 | 3843263 | 382839 | 4.226102 | 2.106321 | 1.240383 | 0.891284 | 0.669077 | 0.543836 |
| 823 | 23.94 | 3812004 | 385327 | 4.197331 | 2.103924 | 1.215284 | 0.892494 | 0.655282 | 0.542583 |
| 827 | 31.28 | 3843880 | 387840 | 4.23172  | 2.109215 | 1.206206 | 0.891692 | 0.636188 | 0.544738 |
| 839 | 25.25 | 3883640 | 393393 | 4.277033 | 2.105147 | 1.232287 | 0.890112 | 0.642709 | 0.536011 |
| 844 | 26.65 | 4435311 | 454940 | 4.890251 | 2.109754 | 1.271354 | 0.897051 | 0.690763 | 0.533552 |
| 851 | 27.56 | 3826600 | 382877 | 4.209477 | 2.107953 | 1.217555 | 0.889127 | 0.635102 | 0.54404  |
| 852 | 27.8  | 3939680 | 398700 | 4.33838  | 2.109442 | 1.208303 | 0.891454 | 0.647631 | 0.537364 |
| 854 | 24.36 | 3938294 | 395025 | 4.333319 | 2.10731  | 1.271783 | 0.893031 | 0.631582 | 0.536866 |
| 855 | 24.53 | 3855180 | 385096 | 4.240276 | 2.10752  | 1.177986 | 0.88915  | 0.64307  | 0.530569 |
| 856 | 24.63 | 3929270 | 397513 | 4.326783 | 2.104165 | 1.247947 | 0.89601  | 0.645249 | 0.535176 |
| 857 | 28.51 | 3825906 | 387491 | 4.213397 | 2.101339 | 1.227999 | 0.894502 | 0.654233 | 0.541927 |
| 860 | 28.51 | 3829289 | 388095 | 4.217384 | 2.10102  | 1.238526 | 0.894055 | 0.653761 | 0.53627  |
| 861 | 26.2  | 3881156 | 392537 | 4.273693 | 2.10956  | 1.230353 | 0.891503 | 0.650129 | 0.543321 |
| 862 | 31.37 | 3804286 | 385087 | 4.189373 | 2.107746 | 1.19358  | 0.889284 | 0.640538 | 0.539729 |
| 868 | 27.71 | 3860065 | 390358 | 4.250423 | 2.108272 | 1.227886 | 0.892655 | 0.648479 | 0.539664 |
| 869 | 28.71 | 3829284 | 382926 | 4.21221  | 2.105147 | 1.207921 | 0.889173 | 0.637708 | 0.544986 |



|      |       |         |        |          |          |          |          |          |          |
|------|-------|---------|--------|----------|----------|----------|----------|----------|----------|
| 875  | 26.34 | 3827458 | 387209 | 4.214667 | 2.109535 | 1.196381 | 0.889167 | 0.633637 | 0.541586 |
| 885  | 31.94 | 3830412 | 383818 | 4.21423  | 2.108475 | 1.205188 | 0.89346  | 0.659092 | 0.539889 |
| 886  | 30.98 | 3927483 | 393653 | 4.321136 | 2.107541 | 1.224575 | 0.895532 | 0.665896 | 0.537371 |
| 887  | 32.22 | 3827302 | 386977 | 4.214279 | 2.107049 | 1.202784 | 0.890489 | 0.651258 | 0.540356 |
| 888  | 29.75 | 3875682 | 392388 | 4.26807  | 2.101976 | 1.227327 | 0.895601 | 0.649028 | 0.537535 |
| 910  | 27.35 | 3799459 | 383497 | 4.182956 | 2.108686 | 1.205253 | 0.887732 | 0.648289 | 0.537793 |
| 912  | 26.59 | 3793392 | 383325 | 4.176717 | 2.104856 | 1.20212  | 0.8902   | 0.639903 | 0.542617 |
| 914  | 25.89 | 4529520 | 463926 | 4.993446 | 2.110399 | 1.269314 | 0.900788 | 0.698838 | 0.530748 |
| 915  | 30.67 | 3821838 | 385273 | 4.207111 | 2.105823 | 1.205663 | 0.889687 | 0.644363 | 0.542042 |
| 916  | 31.32 | 3879382 | 392947 | 4.272329 | 2.102128 | 1.214595 | 0.893824 | 0.630561 | 0.540059 |
| 917  | 29.41 | 3826866 | 386865 | 4.213731 | 2.108888 | 1.210192 | 0.890677 | 0.643044 | 0.544117 |
| 919  | 25.31 | 3816653 | 386067 | 4.20272  | 2.100337 | 1.248674 | 0.895572 | 0.650343 | 0.544646 |
| 920  | 35.83 | 3819082 | 382962 | 4.202044 | 2.103858 | 1.196014 | 0.892262 | 0.632934 | 0.538295 |
| 923  | 26.63 | 4594787 | 469361 | 5.064148 | 2.106969 | 1.293591 | 0.898675 | 0.686058 | 0.533193 |
| 925  | 29.29 | 3817545 | 383783 | 4.201328 | 2.103195 | 1.226656 | 0.896028 | 0.638915 | 0.542062 |
| 927  | 28.3  | 4435269 | 451680 | 4.886949 | 2.108922 | 1.26457  | 0.895766 | 0.68591  | 0.529563 |
| 928  | 31.72 | 3898933 | 391993 | 4.290926 | 2.104267 | 1.23861  | 0.892991 | 0.649254 | 0.538731 |
| 930  | 26.01 | 4594498 | 469505 | 5.064003 | 2.10998  | 1.292553 | 0.897416 | 0.693991 | 0.531665 |
| 931  | 24.51 | 3867248 | 386752 | 4.254    | 2.105355 | 1.236173 | 0.890057 | 0.64164  | 0.539414 |
| 932  | 28.56 | 3844962 | 386334 | 4.231296 | 2.106904 | 1.215651 | 0.889525 | 0.651249 | 0.537434 |
| 933  | 23.66 | 3913740 | 392235 | 4.305975 | 2.107384 | 1.265489 | 0.895362 | 0.635799 | 0.53638  |
| 934  | 24.31 | 3868710 | 388950 | 4.25766  | 2.106026 | 1.290452 | 0.893838 | 0.655312 | 0.541492 |
| 935  | 28.72 | 3760777 | 375496 | 4.136273 | 2.106981 | 1.264217 | 0.894634 | 0.64246  | 0.538148 |
| 936  | 27.44 | 4494471 | 456735 | 4.951206 | 2.108193 | 1.27969  | 0.90088  | 0.689716 | 0.530343 |
| 937  | 28.98 | 3795086 | 381887 | 4.176973 | 2.107486 | 1.198482 | 0.889781 | 0.632029 | 0.538819 |
| 938  | 25.3  | 3788614 | 379569 | 4.168183 | 2.105821 | 1.220828 | 0.889541 | 0.642086 | 0.536965 |
| 941  | 31.9  | 3942853 | 395964 | 4.338817 | 2.105176 | 1.238997 | 0.894315 | 0.640987 | 0.537277 |
| 942  | 31.91 | 3902680 | 393493 | 4.296173 | 2.102762 | 1.225319 | 0.888332 | 0.640989 | 0.538704 |
| 944  | 30.12 | 3836670 | 385791 | 4.222461 | 2.10155  | 1.239069 | 0.896669 | 0.629867 | 0.538951 |
| 946  | 29    | 3871471 | 389723 | 4.261194 | 2.105068 | 1.267692 | 0.894257 | 0.646991 | 0.532008 |
| 950  | 32.15 | 4550262 | 464423 | 5.014685 | 2.106607 | 1.264858 | 0.899475 | 0.689228 | 0.533507 |
| 954  | 25.16 | 3807769 | 383015 | 4.190784 | 2.102697 | 1.286218 | 0.8993   | 0.632907 | 0.548368 |
| 955  | 31.45 | 3852081 | 386036 | 4.238117 | 2.106851 | 1.193252 | 0.889265 | 0.630958 | 0.539979 |
| 957  | 23.66 | 3887583 | 390174 | 4.277757 | 2.108257 | 1.250352 | 0.890767 | 0.644916 | 0.538453 |
| 959  | 31.42 | 3913660 | 392376 | 4.306036 | 2.103446 | 1.223602 | 0.892265 | 0.641814 | 0.539481 |
| 960  | 25.03 | 3843149 | 384778 | 4.227927 | 2.10832  | 1.24239  | 0.892722 | 0.652274 | 0.536566 |
| 961  | 28.44 | 3831715 | 383906 | 4.215621 | 2.101104 | 1.226139 | 0.893285 | 0.636445 | 0.541845 |
| 962  | 24.74 | 3819767 | 383234 | 4.203001 | 2.104028 | 1.235808 | 0.893866 | 0.643692 | 0.538925 |
| 963  | 26.9  | 4333990 | 437751 | 4.771741 | 2.107381 | 1.271744 | 0.89237  | 0.674357 | 0.534742 |
| 964  | 24.07 | 4075803 | 408375 | 4.484178 | 2.105699 | 1.277153 | 0.890698 | 0.658857 | 0.535069 |
| 965  | 24.88 | 3825490 | 381984 | 4.207474 | 2.107167 | 1.222251 | 0.89105  | 0.639069 | 0.537589 |
| 967  | 24.91 | 3813135 | 381431 | 4.194566 | 2.101481 | 1.259115 | 0.897784 | 0.640016 | 0.538754 |
| 969  | 26.71 | 4636812 | 472025 | 5.108837 | 2.107606 | 1.306827 | 0.899555 | 0.694704 | 0.533238 |
| 974  | 24.08 | 3897968 | 390365 | 4.288333 | 2.106943 | 1.261719 | 0.895142 | 0.647626 | 0.537005 |
| 979  | 24.23 | 4061999 | 407474 | 4.469473 | 2.103407 | 1.260202 | 0.882023 | 0.633614 | 0.538196 |
| 986  | 23.99 | 3801930 | 380341 | 4.182271 | 2.109952 | 1.233919 | 0.890487 | 0.632106 | 0.53478  |
| 989  | 31.62 | 3847243 | 385767 | 4.23301  | 2.10491  | 1.244298 | 0.892531 | 0.636492 | 0.539322 |
| 990  | 27.09 | 3800286 | 380381 | 4.180667 | 2.101255 | 1.24739  | 0.894367 | 0.636498 | 0.543477 |
| 991  | 29.34 | 3826294 | 383741 | 4.210035 | 2.09948  | 1.244451 | 0.893114 | 0.643211 | 0.542404 |
| 995  | 29.07 | 3792613 | 379800 | 4.172413 | 2.107034 | 1.228796 | 0.891907 | 0.637686 | 0.538604 |
| 1074 | 33.63 | 3827240 | 386022 | 4.213262 | 2.10393  | 1.188613 | 0.889481 | 0.639597 | 0.541014 |
| 2002 | 18.15 | 3768940 | 375476 | 4.144416 | 2.107516 | 1.245797 | 0.888442 | 0.64507  | 0.535658 |
| 2003 | 27.18 | 3840875 | 385585 | 4.22646  | 2.103674 | 1.276914 | 0.891841 | 0.633773 | 0.540628 |
| 2006 | 27.48 | 3821112 | 382408 | 4.20352  | 2.107558 | 1.232536 | 0.89056  | 0.637035 | 0.53904  |
| 2007 | 25.75 | 3772621 | 377563 | 4.150184 | 2.107726 | 1.21746  | 0.890069 | 0.642528 | 0.538732 |
| 2009 | 25.67 | 3868526 | 387946 | 4.256472 | 2.106341 | 1.26533  | 0.893326 | 0.639467 | 0.537393 |
| 2012 | 27.03 | 3865646 | 386435 | 4.252081 | 2.106597 | 1.239821 | 0.890128 | 0.628021 | 0.539849 |
| 2013 | 30.01 | 3875716 | 387676 | 4.263392 | 2.105278 | 1.225523 | 0.8909   | 0.640775 | 0.535001 |
| 2015 | 25.16 | 3954241 | 396506 | 4.350747 | 2.107726 | 1.271803 | 0.891587 | 0.643197 | 0.537859 |
| 2020 | 25.46 | 3804341 | 379368 | 4.183709 | 2.108446 | 1.22486  | 0.889306 | 0.632436 | 0.540296 |
| 2025 | 28.89 | 3788214 | 379769 | 4.167983 | 2.108456 | 1.208386 | 0.89146  | 0.638097 | 0.536575 |
| 2032 | 25.75 | 3808157 | 383192 | 4.191349 | 2.10413  | 1.242658 | 0.896046 | 0.63512  | 0.535662 |
| 2035 | 23.15 | 3778218 | 379144 | 4.157362 | 2.102358 | 1.244352 | 0.895803 | 0.635294 | 0.540638 |
| 2036 | 21.22 | 3768710 | 375440 | 4.14415  | 2.10814  | 1.235207 | 0.890786 | 0.624195 | 0.536605 |
| 2038 | 24.48 | 3835087 | 384067 | 4.219154 | 2.108017 | 1.25847  | 0.889718 | 0.642276 | 0.535311 |
| 2039 | 21.36 | 3835354 | 383360 | 4.218714 | 2.106013 | 1.281718 | 0.893383 | 0.641826 | 0.536325 |
| 2051 | 23.12 | 3789540 | 379165 | 4.168705 | 2.103565 | 1.25458  | 0.895512 | 0.624804 | 0.537538 |
| 2055 | 27.36 | 3767378 | 376810 | 4.144188 | 2.106596 | 1.231305 | 0.890295 | 0.642811 | 0.539947 |
| 2059 | 28.06 | 3854475 | 385739 | 4.240214 | 2.107919 | 1.245391 | 0.893225 | 0.638775 | 0.538721 |
| 2061 | 28.27 | 3806904 | 382543 | 4.189447 | 2.10208  | 1.242881 | 0.895462 | 0.639939 | 0.53584  |

|      |       |         |        |          |          |          |          |          |          |
|------|-------|---------|--------|----------|----------|----------|----------|----------|----------|
| 2062 | 31.65 | 3890294 | 389226 | 4.27952  | 2.103634 | 1.250413 | 0.892529 | 0.636379 | 0.538738 |
| 2063 | 25.27 | 3878027 | 387026 | 4.265053 | 2.103857 | 1.255942 | 0.892539 | 0.629154 | 0.536371 |
| 2064 | 24.18 | 4579893 | 465633 | 5.045526 | 2.11001  | 1.324896 | 0.901485 | 0.706886 | 0.533794 |
| 2065 | 27.12 | 3789703 | 379182 | 4.168885 | 2.105612 | 1.261827 | 0.896477 | 0.640076 | 0.536299 |
| 2073 | 26.23 | 3774070 | 376594 | 4.150664 | 2.10134  | 1.233172 | 0.89075  | 0.640496 | 0.53985  |
| 2086 | 26.08 | 3798956 | 381851 | 4.180807 | 2.104584 | 1.221077 | 0.889724 | 0.643531 | 0.540344 |
| 2136 | 32.45 | 3824152 | 384411 | 4.208563 | 2.105538 | 1.19925  | 0.889623 | 0.639935 | 0.543434 |
| 2137 | 29.61 | 3786308 | 380457 | 4.166765 | 2.104759 | 1.21047  | 0.892229 | 0.642239 | 0.540445 |
| 2138 | 30.25 | 3833546 | 385815 | 4.219361 | 2.105622 | 1.230349 | 0.888805 | 0.648133 | 0.540289 |
| 2156 | 29.51 | 3835306 | 385803 | 4.221109 | 2.103131 | 1.244325 | 0.892857 | 0.64969  | 0.542338 |
| 2157 | 27.05 | 3819272 | 384715 | 4.203987 | 2.103261 | 1.244555 | 0.8904   | 0.634469 | 0.541714 |
| 2159 | 33.26 | 3845646 | 386501 | 4.232147 | 2.107949 | 1.206342 | 0.892064 | 0.644201 | 0.5394   |
| 2161 | 30.1  | 3823240 | 385619 | 4.208859 | 2.101917 | 1.238887 | 0.893712 | 0.64875  | 0.545441 |
| 2162 | 28.1  | 3825922 | 385551 | 4.211473 | 2.103573 | 1.237383 | 0.893807 | 0.642141 | 0.541395 |
| 2163 | 29.62 | 3843054 | 387093 | 4.230147 | 2.102129 | 1.241833 | 0.895986 | 0.638045 | 0.541262 |
| 2167 | 35.75 | 3831137 | 385839 | 4.216976 | 2.106951 | 1.218269 | 0.894462 | 0.636788 | 0.544814 |
| 2184 | 31.54 | 3812631 | 382933 | 4.195564 | 2.10654  | 1.214868 | 0.890871 | 0.641188 | 0.53965  |
| 2186 | 27.57 | 3946744 | 397822 | 4.344566 | 2.105613 | 1.249412 | 0.893405 | 0.649139 | 0.538511 |
| 2189 | 30.6  | 3833674 | 386746 | 4.22042  | 2.103503 | 1.225446 | 0.894576 | 0.643086 | 0.541181 |
| 2194 | 33.05 | 3841762 | 388162 | 4.229924 | 2.102078 | 1.230876 | 0.894781 | 0.635206 | 0.542586 |
| 2197 | 33.15 | 3821946 | 386378 | 4.208324 | 2.101011 | 1.225057 | 0.892394 | 0.647141 | 0.540498 |

Table S4

| Gene    | ACMG - HCM/DCM/LVNC                        | HGMD ("LVNC" 10/02/19 & "left ventricular noncompaction" 10/02/19)                                                            | PMCS837460 - HCM                                                                                                   | PMCS116235 - HCM     | HGMD ("HCM" 2/6/19)                                                                                                                                              | Fulgent HCM | Centogene HCM | Mayo_inheritance_di_vase HCM                                                                                         | GeneDx HCM | Invitae HCM                                   | PMCS116235 - DCM  | HGMD ("DCM" 2/11/19)                                                                                                                                                                                                  | Invitae DCM                                   | Mayo_inheritance_di_vase DCM                                                                                         |
|---------|--------------------------------------------|-------------------------------------------------------------------------------------------------------------------------------|--------------------------------------------------------------------------------------------------------------------|----------------------|------------------------------------------------------------------------------------------------------------------------------------------------------------------|-------------|---------------|----------------------------------------------------------------------------------------------------------------------|------------|-----------------------------------------------|-------------------|-----------------------------------------------------------------------------------------------------------------------------------------------------------------------------------------------------------------------|-----------------------------------------------|----------------------------------------------------------------------------------------------------------------------|
| AZML1   |                                            |                                                                                                                               |                                                                                                                    |                      |                                                                                                                                                                  | fulgent     |               |                                                                                                                      |            | Invitae-RASopathy                             |                   |                                                                                                                                                                                                                       | Invitae-RASopathy                             |                                                                                                                      |
| ABCC9   |                                            |                                                                                                                               |                                                                                                                    |                      | (cardiomyopathy, hypertrophic)                                                                                                                                   | fulgent     |               |                                                                                                                      | GeneDx     |                                               | no excess         | (Cardiomyopathy, dilated)                                                                                                                                                                                             | Invitae-primary panel                         | mayo_AD_DCM, Cantu syndrome                                                                                          |
| ACAD9   |                                            |                                                                                                                               |                                                                                                                    |                      | (cardiomyopathy, hypertrophic)                                                                                                                                   |             |               |                                                                                                                      |            |                                               |                   |                                                                                                                                                                                                                       |                                               |                                                                                                                      |
| ACADVL  |                                            |                                                                                                                               |                                                                                                                    |                      |                                                                                                                                                                  | fulgent     |               |                                                                                                                      |            | Invitae-AR syndromic pediatric cardiomyopathy |                   |                                                                                                                                                                                                                       | Invitae-AR syndromic pediatric cardiomyopathy |                                                                                                                      |
| ACE     |                                            |                                                                                                                               |                                                                                                                    |                      | (Hypertrophic cardiomyopathy, association with)                                                                                                                  |             |               |                                                                                                                      |            |                                               |                   |                                                                                                                                                                                                                       |                                               |                                                                                                                      |
| ACTA1   |                                            |                                                                                                                               | rare, recessive, phenocopy                                                                                         |                      | (Hypertrophic cardiomyopathy, myocardial noncompaction & transmural crypts); (cardiomyopathy, hypertrophic); (Nemaline myopathy and hypertrophic cardiomyopathy) |             |               |                                                                                                                      |            |                                               |                   | (Fibre type disproportion, congenital and dilated cardiomyopathy); (Nemaline myopathy and dilated cardiomyopathy); (Cardiomyopathy, dilated)                                                                          |                                               |                                                                                                                      |
| ACTC1   | (HCM, test DCM/LVNC); (secondary finding)  | (Cardiomyopathy, hypertrophic/dilated with left ventricular noncompaction); (Left ventricular noncompaction with arrhythmias) | sarcomere, validated                                                                                               | Nontruncating excess | (cardiomyopathy, hypertrophic)                                                                                                                                   | fulgent     | centogene     | mayo_AD_Chd_DCM, HCM, LVNC                                                                                           | GeneDx     | Invitae-primary panel                         | no excess         | (Cardiomyopathy, dilated)                                                                                                                                                                                             | Invitae-primary panel                         | mayo_AD_Chd, DCM, HCM, LVNC                                                                                          |
| ACTN2   | (HCM, test DCM/LVNC)                       | (Ventricular fibrillation, left ventricular noncompaction and sudden death)                                                   | moderate: no excess but human evidence -> very rare that mutation in this gene is causative, most mutations benign | no excess            | (cardiomyopathy, hypertrophic)                                                                                                                                   | fulgent     | centogene     | mayo_AD_DCM, HCM                                                                                                     | GeneDx     | Invitae-primary panel                         | no excess         | (Cardiomyopathy, dilated)                                                                                                                                                                                             | Invitae-primary panel                         | mayo_AD_DCM, HCM                                                                                                     |
| ADRB2   |                                            |                                                                                                                               |                                                                                                                    |                      |                                                                                                                                                                  |             |               |                                                                                                                      |            |                                               |                   | (Cardiomyopathy, dilated)                                                                                                                                                                                             |                                               |                                                                                                                      |
| AGL     |                                            |                                                                                                                               |                                                                                                                    |                      |                                                                                                                                                                  | fulgent     |               |                                                                                                                      |            | Invitae-primary panel                         |                   |                                                                                                                                                                                                                       | Invitae-primary panel                         |                                                                                                                      |
| AGTR1   |                                            |                                                                                                                               |                                                                                                                    |                      | (Hypertrophic cardiomyopathy, association with)                                                                                                                  |             |               |                                                                                                                      |            |                                               |                   |                                                                                                                                                                                                                       |                                               |                                                                                                                      |
| AKAP9   |                                            |                                                                                                                               |                                                                                                                    |                      | (cardiomyopathy, hypertrophic)                                                                                                                                   |             |               |                                                                                                                      | GeneDx     |                                               |                   | (Cardiomyopathy, dilated)                                                                                                                                                                                             |                                               |                                                                                                                      |
| ALMS1   |                                            |                                                                                                                               |                                                                                                                    |                      |                                                                                                                                                                  |             |               |                                                                                                                      | GeneDx     |                                               |                   |                                                                                                                                                                                                                       |                                               |                                                                                                                      |
| ALPK3   |                                            |                                                                                                                               |                                                                                                                    |                      | (cardiomyopathy, hypertrophic)                                                                                                                                   |             |               |                                                                                                                      | GeneDx     |                                               |                   |                                                                                                                                                                                                                       |                                               |                                                                                                                      |
| ANKRD1  |                                            |                                                                                                                               | functional data only                                                                                               | no excess            | (cardiomyopathy, hypertrophic)                                                                                                                                   | fulgent     | centogene     | mayo_AD_HCM, DCM                                                                                                     | GeneDx     | Invitae-preliminary evidence                  | no excess         | (Dilated cardiomyopathy); (Cardiomyopathy, dilated)                                                                                                                                                                   | Invitae-preliminary evidence                  | mayo_AD_HCM, DCM                                                                                                     |
| B2M     |                                            |                                                                                                                               |                                                                                                                    |                      | (cardiomyopathy, hypertrophic)                                                                                                                                   |             |               |                                                                                                                      |            |                                               |                   |                                                                                                                                                                                                                       |                                               |                                                                                                                      |
| BAG3    | (DCM, test LVNC)                           |                                                                                                                               |                                                                                                                    |                      | (cardiomyopathy, hypertrophic)                                                                                                                                   | fulgent     |               |                                                                                                                      | GeneDx     | Invitae-primary panel                         |                   | (Cardiomyopathy, dilated)                                                                                                                                                                                             | Invitae-primary panel                         |                                                                                                                      |
| BRAF    |                                            |                                                                                                                               |                                                                                                                    |                      | (cardiomyopathy, hypertrophic)                                                                                                                                   | fulgent     |               |                                                                                                                      | GeneDx     | Invitae-RASopathy                             |                   |                                                                                                                                                                                                                       | Invitae-RASopathy                             |                                                                                                                      |
| C2orf40 |                                            |                                                                                                                               |                                                                                                                    |                      |                                                                                                                                                                  |             |               |                                                                                                                      |            |                                               |                   | (Cardiomyopathy, dilated)                                                                                                                                                                                             |                                               |                                                                                                                      |
| CACNA1C |                                            |                                                                                                                               | HCM+arrhythmia -> likely cause arrhythmia only                                                                     |                      | (cardiomyopathy, hypertrophic); (Long QT syndrome with hypertrophic cardiomyopathy)                                                                              | fulgent     |               |                                                                                                                      |            | Invitae-primary panel                         |                   |                                                                                                                                                                                                                       | Invitae-primary panel                         |                                                                                                                      |
| CALM2   |                                            |                                                                                                                               |                                                                                                                    |                      | (Long QT syndrome & hypertrophic cardiomyopathy)                                                                                                                 |             |               |                                                                                                                      |            |                                               |                   |                                                                                                                                                                                                                       |                                               |                                                                                                                      |
| CALR3   |                                            |                                                                                                                               | no evidence (same rare variant frequency as EXAC)                                                                  |                      |                                                                                                                                                                  | fulgent     | centogene     |                                                                                                                      |            | Invitae-preliminary evidence                  |                   | (Cardiomyopathy, dilated)                                                                                                                                                                                             | Invitae-preliminary evidence                  |                                                                                                                      |
| CASK    |                                            |                                                                                                                               |                                                                                                                    |                      |                                                                                                                                                                  |             |               |                                                                                                                      |            |                                               |                   | (Developmental delay, hearing loss and dilated cardiomyopathy)                                                                                                                                                        |                                               |                                                                                                                      |
| CASQ2   |                                            |                                                                                                                               | no evidence (same rare variant frequency as EXAC)                                                                  |                      | (cardiomyopathy, hypertrophic)                                                                                                                                   |             |               |                                                                                                                      |            |                                               | no excess         | (Cardiomyopathy, dilated)                                                                                                                                                                                             |                                               |                                                                                                                      |
| CASZ1   |                                            |                                                                                                                               |                                                                                                                    |                      |                                                                                                                                                                  |             |               |                                                                                                                      |            |                                               |                   | (Cardiomyopathy, dilated)                                                                                                                                                                                             |                                               |                                                                                                                      |
| CAV3    |                                            |                                                                                                                               | functional data only                                                                                               |                      | (cardiomyopathy, hypertrophic); (Hypertrophic cardiomyopathy)                                                                                                    | fulgent     | centogene     | mayo_AD_AR_HCM, LQTS, LGMD, Tatyana-type distal myopathy, rippling muscle disease                                    | GeneDx     | Invitae-primary panel                         | no excess         | (Dilated cardiomyopathy and limb girdle muscular dystrophy 1G)                                                                                                                                                        | Invitae-primary panel                         |                                                                                                                      |
| CAVIN4  |                                            |                                                                                                                               |                                                                                                                    |                      |                                                                                                                                                                  |             |               |                                                                                                                      |            |                                               |                   | (Cardiomyopathy, dilated)                                                                                                                                                                                             |                                               |                                                                                                                      |
| CBL     |                                            |                                                                                                                               |                                                                                                                    |                      | (cardiomyopathy, hypertrophic)                                                                                                                                   | fulgent     |               |                                                                                                                      |            | Invitae-RASopathy                             |                   |                                                                                                                                                                                                                       | Invitae-RASopathy                             |                                                                                                                      |
| cfhrtv7 |                                            |                                                                                                                               |                                                                                                                    |                      | (cardiomyopathy, hypertrophic)                                                                                                                                   |             |               |                                                                                                                      |            |                                               |                   |                                                                                                                                                                                                                       |                                               |                                                                                                                      |
| CHRM2   |                                            |                                                                                                                               |                                                                                                                    |                      |                                                                                                                                                                  |             |               |                                                                                                                      | GeneDx     |                                               |                   | (Cardiomyopathy, dilated)                                                                                                                                                                                             | Invitae-preliminary evidence                  |                                                                                                                      |
| CMA5    |                                            |                                                                                                                               |                                                                                                                    |                      | (cardiomyopathy, hypertrophic)                                                                                                                                   |             |               |                                                                                                                      |            |                                               |                   |                                                                                                                                                                                                                       |                                               |                                                                                                                      |
| CNBP    |                                            |                                                                                                                               |                                                                                                                    |                      |                                                                                                                                                                  |             |               |                                                                                                                      |            |                                               |                   | (Cardiomyopathy, dilated)                                                                                                                                                                                             |                                               |                                                                                                                      |
| COA5    |                                            |                                                                                                                               |                                                                                                                    |                      | (Hypertrophic cardiomyopathy, fetal neonatal)                                                                                                                    |             |               |                                                                                                                      |            |                                               |                   |                                                                                                                                                                                                                       |                                               |                                                                                                                      |
| COX15   |                                            |                                                                                                                               | rare, recessive, phenocopy                                                                                         |                      | (Hypertrophic cardiomyopathy, early onset)                                                                                                                       |             |               |                                                                                                                      |            |                                               |                   |                                                                                                                                                                                                                       |                                               |                                                                                                                      |
| CPT2    |                                            |                                                                                                                               |                                                                                                                    |                      |                                                                                                                                                                  | fulgent     |               |                                                                                                                      |            | Invitae-AR syndromic pediatric cardiomyopathy |                   |                                                                                                                                                                                                                       | Invitae-AR syndromic pediatric cardiomyopathy |                                                                                                                      |
| CRB1    |                                            |                                                                                                                               |                                                                                                                    |                      |                                                                                                                                                                  |             |               |                                                                                                                      |            |                                               |                   | (CRB1-related maculopathy with cystoid macular oedema)                                                                                                                                                                |                                               |                                                                                                                      |
| CRVAB   |                                            |                                                                                                                               | moderate:                                                                                                          |                      | (cardiomyopathy, hypertrophic)                                                                                                                                   | fulgent     | centogene     |                                                                                                                      | GeneDx     |                                               | no excess         | (Cardiomyopathy, dilated)                                                                                                                                                                                             | Invitae-primary panel                         | mayo_AD_AR_DCM, myofibrillar myopathy                                                                                |
| CSRP3   | (HCM, test DCM/LVNC)                       |                                                                                                                               | strong: excess + human genetic evidence                                                                            | no excess            | (cardiomyopathy, hypertrophic)                                                                                                                                   | fulgent     | centogene     | mayo_AD_HCM, DCM                                                                                                     | GeneDx     | Invitae-primary panel                         | no excess         | (Cardiomyopathy, dilated)                                                                                                                                                                                             | Invitae-primary panel                         | mayo_AD_HCM, DCM                                                                                                     |
| CTF1    |                                            |                                                                                                                               |                                                                                                                    |                      |                                                                                                                                                                  | fulgent     |               |                                                                                                                      |            |                                               |                   | (Cardiomyopathy, dilated)                                                                                                                                                                                             | Invitae-preliminary evidence                  |                                                                                                                      |
| CTLA4   |                                            |                                                                                                                               |                                                                                                                    |                      |                                                                                                                                                                  |             |               |                                                                                                                      |            |                                               |                   | (Dilated cardiomyopathy, association with)                                                                                                                                                                            |                                               |                                                                                                                      |
| CTNNA3  |                                            |                                                                                                                               |                                                                                                                    |                      | (Hypertrophic cardiomyopathy or arrhythmogenic cardiomyopathy)                                                                                                   |             |               |                                                                                                                      | GeneDx     |                                               |                   | (Cardiomyopathy, dilated)                                                                                                                                                                                             | Invitae-preliminary evidence                  |                                                                                                                      |
| DES     | (ARVC, test DCM/LVNC)                      |                                                                                                                               |                                                                                                                    |                      | (cardiomyopathy, hypertrophic); (Hypertrophic cardiomyopathy with conduction system disease)                                                                     | fulgent     | centogene     | mayo_AD_AR_DCM, ARVC, myofibrillar myopathy RCM with AV block, neurogenic scapuloperoneal syndrome Kaeser type, LGMD | GeneDx     | Invitae-primary panel                         | no excess         | (Cardiomyopathy, dilated)                                                                                                                                                                                             | Invitae-primary panel                         | mayo_AD_AR_DCM, ARVC, myofibrillar myopathy RCM with AV block, neurogenic scapuloperoneal syndrome Kaeser type, LGMD |
| DLG1    |                                            |                                                                                                                               |                                                                                                                    |                      | (cardiomyopathy, hypertrophic)                                                                                                                                   |             |               |                                                                                                                      |            |                                               |                   |                                                                                                                                                                                                                       |                                               |                                                                                                                      |
| DMD     |                                            | (Bradycardia, left bundle branch block & left ventricular noncompaction)                                                      |                                                                                                                    |                      |                                                                                                                                                                  | fulgent     |               |                                                                                                                      | GeneDx     |                                               |                   | (Cardiomyopathy, dilated, X-linked); (Muscular dystrophy, Becker / dilated cardiomyopathy, X-linked); (Muscular dystrophy, Becker with dilated cardiomyopathy & progressive heart failure); (Cardiomyopathy, dilated) | Invitae-primary panel                         |                                                                                                                      |
| DNAJC19 |                                            |                                                                                                                               |                                                                                                                    |                      |                                                                                                                                                                  |             |               |                                                                                                                      |            |                                               |                   |                                                                                                                                                                                                                       | Invitae-AR syndromic pediatric cardiomyopathy |                                                                                                                      |
| DOLK    |                                            |                                                                                                                               |                                                                                                                    |                      |                                                                                                                                                                  |             |               |                                                                                                                      | GeneDx     |                                               |                   | (Severe ichthyosis, distal digital constrictions and dilated cardiomyopathy); (Cardiomyopathy, dilated)                                                                                                               | Invitae-primary panel                         |                                                                                                                      |
| DSG2    | (ARVC, test DCM/LVNC); (secondary finding) |                                                                                                                               |                                                                                                                    |                      |                                                                                                                                                                  | fulgent     |               |                                                                                                                      | GeneDx     |                                               | no excess         | (Cardiomyopathy, dilated)                                                                                                                                                                                             | Invitae-primary panel                         |                                                                                                                      |
| DSG2    | (ARVC, test DCM/LVNC); (secondary finding) |                                                                                                                               |                                                                                                                    |                      | (cardiomyopathy, hypertrophic)                                                                                                                                   | fulgent     |               |                                                                                                                      | GeneDx     |                                               | no excess         | (Cardiomyopathy, dilated)                                                                                                                                                                                             | Invitae-primary panel                         |                                                                                                                      |
| DSP     | (ARVC, test DCM/LVNC); (secondary finding) |                                                                                                                               |                                                                                                                    |                      | (Hypertrophic cardiomyopathy); (cardiomyopathy, hypertrophic); (arrhythmogenic CM or HCM)                                                                        | fulgent     |               |                                                                                                                      | GeneDx     |                                               | Truncating excess | (Dilated cardiomyopathy, woolly hair, keratoderma); (Cardiomyopathy, dilated)                                                                                                                                         | Invitae-primary panel                         |                                                                                                                      |
| DTNA    |                                            | (Left ventricular noncompaction with CHD)                                                                                     |                                                                                                                    |                      |                                                                                                                                                                  | fulgent     |               |                                                                                                                      | GeneDx     |                                               | no excess         | (Cardiomyopathy, dilated)                                                                                                                                                                                             | Invitae-preliminary evidence                  |                                                                                                                      |
| EEF1A2  |                                            |                                                                                                                               |                                                                                                                    |                      |                                                                                                                                                                  |             |               |                                                                                                                      |            |                                               |                   | (Dilated cardiomyopathy, failure to thrive, global developmental delay, epilepsy & early death)                                                                                                                       |                                               |                                                                                                                      |
| EGFR    |                                            |                                                                                                                               |                                                                                                                    |                      |                                                                                                                                                                  |             |               |                                                                                                                      |            |                                               |                   | (Dilated cardiomyopathy, association with)                                                                                                                                                                            |                                               |                                                                                                                      |
| ELAC2   |                                            |                                                                                                                               |                                                                                                                    |                      | (Hypertrophic cardiomyopathy and complex I deficiency)                                                                                                           | fulgent     |               |                                                                                                                      |            | Invitae-AR syndromic pediatric cardiomyopathy |                   |                                                                                                                                                                                                                       | Invitae-AR syndromic pediatric cardiomyopathy |                                                                                                                      |
| EMD     |                                            | (Bradycardia, left bundle branch block & left ventricular noncompaction)                                                      |                                                                                                                    |                      |                                                                                                                                                                  | fulgent     |               |                                                                                                                      | GeneDx     |                                               | no excess         | (X-linked dilated cardiomyopathy with conduction defects & arrhythmias); (Cardiomyopathy, dilated)                                                                                                                    | Invitae-primary panel                         |                                                                                                                      |

|          |                                                  |                                                                                                                                         |                                                |                                                                                                                                                                                                                                                            |         |           |                             |  |        |                              |                                            |  |                                                                                                                                                                                                                                                                                                                                                                                                                       |                              |                                                                                      |
|----------|--------------------------------------------------|-----------------------------------------------------------------------------------------------------------------------------------------|------------------------------------------------|------------------------------------------------------------------------------------------------------------------------------------------------------------------------------------------------------------------------------------------------------------|---------|-----------|-----------------------------|--|--------|------------------------------|--------------------------------------------|--|-----------------------------------------------------------------------------------------------------------------------------------------------------------------------------------------------------------------------------------------------------------------------------------------------------------------------------------------------------------------------------------------------------------------------|------------------------------|--------------------------------------------------------------------------------------|
| EW4      |                                                  |                                                                                                                                         |                                                |                                                                                                                                                                                                                                                            |         |           |                             |  | GeneDx |                              |                                            |  | (Dilated cardiomyopathy and senile atrial fibrillation); (Cardiomyopathy, dilated)                                                                                                                                                                                                                                                                                                                                    | Invitae-primary panel        |                                                                                      |
| FBXO32   |                                                  |                                                                                                                                         |                                                |                                                                                                                                                                                                                                                            |         |           |                             |  |        |                              |                                            |  | (Cardiomyopathy, dilated)                                                                                                                                                                                                                                                                                                                                                                                             |                              |                                                                                      |
| FBXO7    |                                                  |                                                                                                                                         |                                                | (Mean cell haemoglobin, association with)                                                                                                                                                                                                                  |         |           |                             |  |        |                              |                                            |  |                                                                                                                                                                                                                                                                                                                                                                                                                       |                              |                                                                                      |
| FHL1     |                                                  | strong: excess + human genetic evidence                                                                                                 | Nontruncating excess                           | (cardiomyopathy, hypertrophic); (X-linked myopathy with hypertrophic cardiomyopathy)                                                                                                                                                                       | fulgent |           |                             |  | GeneDx | Invitae-primary panel        | no excess                                  |  | (Cardiomyopathy, dilated)                                                                                                                                                                                                                                                                                                                                                                                             | Invitae-primary panel        |                                                                                      |
| FHL2     |                                                  |                                                                                                                                         | functional data only                           | (cardiomyopathy, hypertrophic)                                                                                                                                                                                                                             |         | centogene |                             |  |        |                              | no excess                                  |  | (Cardiomyopathy, dilated)                                                                                                                                                                                                                                                                                                                                                                                             | Invitae-preliminary evidence |                                                                                      |
| FHD3     |                                                  |                                                                                                                                         |                                                | (cardiomyopathy, hypertrophic)                                                                                                                                                                                                                             |         |           |                             |  |        |                              |                                            |  | (Cardiomyopathy, dilated)                                                                                                                                                                                                                                                                                                                                                                                             |                              |                                                                                      |
| FKBP     |                                                  |                                                                                                                                         |                                                |                                                                                                                                                                                                                                                            |         |           |                             |  | GeneDx |                              |                                            |  | (Cardiomyopathy, dilated)                                                                                                                                                                                                                                                                                                                                                                                             | Invitae-primary panel        |                                                                                      |
| FXTN     | (Left ventricular noncompaction)                 |                                                                                                                                         |                                                |                                                                                                                                                                                                                                                            | fulgent |           |                             |  | GeneDx |                              |                                            |  | (Cardiomyopathy, dilated)                                                                                                                                                                                                                                                                                                                                                                                             | Invitae-primary panel        |                                                                                      |
| FLNC     | (Cardiomyopathy, left ventricular noncompaction) | moderate: genetic evidence, excess not tested                                                                                           |                                                | (cardiomyopathy, hypertrophic)                                                                                                                                                                                                                             | fulgent | centogene |                             |  | GeneDx | Invitae-primary panel        |                                            |  | (Cardiomyopathy, dilated)                                                                                                                                                                                                                                                                                                                                                                                             | Invitae-primary panel        |                                                                                      |
| FLT1     |                                                  |                                                                                                                                         |                                                |                                                                                                                                                                                                                                                            |         |           |                             |  |        |                              |                                            |  | (Cardiomyopathy, dilated)                                                                                                                                                                                                                                                                                                                                                                                             |                              |                                                                                      |
| FOXD4    |                                                  |                                                                                                                                         |                                                |                                                                                                                                                                                                                                                            |         |           |                             |  |        |                              |                                            |  | (Dilated cardiomyopathy, DCM and sudden death)                                                                                                                                                                                                                                                                                                                                                                        |                              |                                                                                      |
| FXN      |                                                  |                                                                                                                                         | functional data only                           | (cardiomyopathy, hypertrophic)                                                                                                                                                                                                                             | fulgent |           |                             |  |        |                              |                                            |  |                                                                                                                                                                                                                                                                                                                                                                                                                       |                              |                                                                                      |
| GAA      |                                                  | metabolic mimic                                                                                                                         |                                                | (Glycogen storage disease type II with hypertrophic cardiomyopathy);(Glycogen storage disease 2, atypical infantile-onset with hypertrophic cardiomyopathy); (cardiomyopathy, hypertrophic); (Glycogen storage disease 2 with hypertrophic cardiomyopathy) | fulgent |           |                             |  | GeneDx | Invitae-primary panel        |                                            |  |                                                                                                                                                                                                                                                                                                                                                                                                                       | Invitae-primary panel        |                                                                                      |
| GATA2    |                                                  |                                                                                                                                         |                                                |                                                                                                                                                                                                                                                            |         |           |                             |  |        |                              |                                            |  | (GATA2 deficiency with melanoma);(MonoMAC and Emberger syndrome); (GATA2 deficiency)                                                                                                                                                                                                                                                                                                                                  |                              |                                                                                      |
| GATA4    | (Left ventricular noncompaction)                 |                                                                                                                                         |                                                |                                                                                                                                                                                                                                                            | fulgent |           |                             |  | GeneDx | Invitae-preliminary evidence |                                            |  | (Dilated cardiomyopathy, sporadic);(Cardiomyopathy, dilated)                                                                                                                                                                                                                                                                                                                                                          | Invitae-preliminary evidence |                                                                                      |
| GATA5    |                                                  |                                                                                                                                         |                                                |                                                                                                                                                                                                                                                            |         |           |                             |  |        |                              |                                            |  | (Cardiomyopathy, dilated)                                                                                                                                                                                                                                                                                                                                                                                             |                              |                                                                                      |
| GATA6    |                                                  |                                                                                                                                         |                                                |                                                                                                                                                                                                                                                            |         |           |                             |  |        |                              |                                            |  | (Cardiomyopathy, dilated)                                                                                                                                                                                                                                                                                                                                                                                             | Invitae-preliminary evidence |                                                                                      |
| GATA1    |                                                  |                                                                                                                                         |                                                |                                                                                                                                                                                                                                                            | fulgent |           |                             |  | GeneDx |                              |                                            |  | (Cardiomyopathy, dilated)                                                                                                                                                                                                                                                                                                                                                                                             | Invitae-preliminary evidence |                                                                                      |
| GLA      | (HCM, test DCM/LVNC; secondary finding)          | metabolic mimic                                                                                                                         | Nontruncating excess                           | (cardiomyopathy, hypertrophic); (Hypertrophic cardiomyopathy with Fabry disease)                                                                                                                                                                           | fulgent | centogene | mayo_X-linked_Fabry disease |  | GeneDx | Invitae-primary panel        | no excess                                  |  |                                                                                                                                                                                                                                                                                                                                                                                                                       | Invitae-primary panel        |                                                                                      |
| GTPBP3   |                                                  |                                                                                                                                         |                                                | (Hypertrophic cardiomyopathy, lactic acidosis & encephalopathy)                                                                                                                                                                                            |         |           |                             |  |        |                              |                                            |  |                                                                                                                                                                                                                                                                                                                                                                                                                       |                              |                                                                                      |
| gtpbp35  |                                                  |                                                                                                                                         |                                                | (Hypertrophic cardiomyopathy, lactic acidosis & encephalopathy)                                                                                                                                                                                            |         |           |                             |  |        |                              |                                            |  |                                                                                                                                                                                                                                                                                                                                                                                                                       |                              |                                                                                      |
| HAND1    |                                                  |                                                                                                                                         |                                                |                                                                                                                                                                                                                                                            |         |           |                             |  |        |                              |                                            |  | (Cardiomyopathy, dilated)                                                                                                                                                                                                                                                                                                                                                                                             |                              |                                                                                      |
| HCN4     |                                                  | (Bradycardia & left ventricular noncompaction cardiomyopathy); (Bradycardia, left bundle branch block & left ventricular noncompaction) |                                                |                                                                                                                                                                                                                                                            |         |           |                             |  | GeneDx |                              |                                            |  |                                                                                                                                                                                                                                                                                                                                                                                                                       | Invitae-primary panel        |                                                                                      |
| HFE      |                                                  |                                                                                                                                         |                                                | (Mean cell haemoglobin, association with)                                                                                                                                                                                                                  |         |           |                             |  | GeneDx |                              |                                            |  |                                                                                                                                                                                                                                                                                                                                                                                                                       |                              |                                                                                      |
| HIF1A    |                                                  |                                                                                                                                         |                                                | (More severe septal hypertrophy and diastolic dysfunction, in hypertrophic cardiomyopathy, association with)                                                                                                                                               |         |           |                             |  |        |                              |                                            |  |                                                                                                                                                                                                                                                                                                                                                                                                                       |                              |                                                                                      |
| HRAS     |                                                  |                                                                                                                                         |                                                |                                                                                                                                                                                                                                                            | fulgent |           |                             |  | GeneDx | Invitae-RASopathy            |                                            |  |                                                                                                                                                                                                                                                                                                                                                                                                                       | Invitae-RASopathy            |                                                                                      |
| HSPB6    |                                                  |                                                                                                                                         |                                                |                                                                                                                                                                                                                                                            |         |           |                             |  |        |                              |                                            |  | (Cardiomyopathy, dilated)                                                                                                                                                                                                                                                                                                                                                                                             |                              |                                                                                      |
| ILK      |                                                  |                                                                                                                                         |                                                | (cardiomyopathy, hypertrophic)                                                                                                                                                                                                                             | fulgent |           |                             |  | GeneDx |                              |                                            |  | (Cardiomyopathy, dilated)                                                                                                                                                                                                                                                                                                                                                                                             | Invitae-preliminary evidence |                                                                                      |
| INS-IGF2 |                                                  |                                                                                                                                         |                                                | (cardiomyopathy, hypertrophic)                                                                                                                                                                                                                             |         |           |                             |  |        |                              |                                            |  |                                                                                                                                                                                                                                                                                                                                                                                                                       |                              |                                                                                      |
| ISL1     |                                                  |                                                                                                                                         |                                                |                                                                                                                                                                                                                                                            |         |           |                             |  |        |                              |                                            |  | (Cardiomyopathy, dilated)                                                                                                                                                                                                                                                                                                                                                                                             |                              |                                                                                      |
| JPH2     |                                                  |                                                                                                                                         | functional data only                           | (cardiomyopathy, hypertrophic)                                                                                                                                                                                                                             | fulgent | centogene |                             |  | GeneDx | Invitae-preliminary evidence |                                            |  | (Cardiomyopathy, dilated)                                                                                                                                                                                                                                                                                                                                                                                             | Invitae-preliminary evidence |                                                                                      |
| JUP      | (ARVC, test DCM/LVNC)                            |                                                                                                                                         |                                                |                                                                                                                                                                                                                                                            |         |           |                             |  |        |                              | no excess                                  |  | (Cardiomyopathy, dilated)                                                                                                                                                                                                                                                                                                                                                                                             | Invitae-primary panel        |                                                                                      |
| KCN1     |                                                  |                                                                                                                                         |                                                |                                                                                                                                                                                                                                                            |         |           |                             |  |        |                              |                                            |  | (Cardiomyopathy, dilated)                                                                                                                                                                                                                                                                                                                                                                                             |                              |                                                                                      |
| KCNH2    |                                                  |                                                                                                                                         |                                                |                                                                                                                                                                                                                                                            |         |           |                             |  |        |                              |                                            |  | (Cardiomyopathy, dilated)                                                                                                                                                                                                                                                                                                                                                                                             |                              |                                                                                      |
| KCNJ12   |                                                  |                                                                                                                                         |                                                |                                                                                                                                                                                                                                                            |         |           |                             |  |        |                              |                                            |  | (Cardiomyopathy, dilated)                                                                                                                                                                                                                                                                                                                                                                                             |                              |                                                                                      |
| KCNQ1    |                                                  | (Long QT syndrome & left ventricular noncompaction)                                                                                     | HCM+arrhythmia -> likely cause arrhythmia only | (cardiomyopathy, hypertrophic)                                                                                                                                                                                                                             | fulgent |           |                             |  | GeneDx |                              |                                            |  | (Cardiomyopathy, dilated)                                                                                                                                                                                                                                                                                                                                                                                             |                              |                                                                                      |
| KIF10    |                                                  |                                                                                                                                         | functional data only                           | (cardiomyopathy, hypertrophic)                                                                                                                                                                                                                             |         |           |                             |  |        |                              |                                            |  | (Cardiomyopathy, dilated)                                                                                                                                                                                                                                                                                                                                                                                             |                              |                                                                                      |
| KRAS     |                                                  |                                                                                                                                         |                                                |                                                                                                                                                                                                                                                            | fulgent |           |                             |  | GeneDx | Invitae-RASopathy            |                                            |  |                                                                                                                                                                                                                                                                                                                                                                                                                       | Invitae-RASopathy            |                                                                                      |
| KRT1     |                                                  |                                                                                                                                         |                                                | (ichthyosis hystrix, Curth-Macklin type)                                                                                                                                                                                                                   |         |           |                             |  |        |                              |                                            |  |                                                                                                                                                                                                                                                                                                                                                                                                                       |                              |                                                                                      |
| LAMA2    |                                                  |                                                                                                                                         |                                                |                                                                                                                                                                                                                                                            |         |           |                             |  |        |                              |                                            |  | (Cardiomyopathy, dilated)                                                                                                                                                                                                                                                                                                                                                                                             |                              |                                                                                      |
| LAMA4    |                                                  |                                                                                                                                         |                                                | (cardiomyopathy, hypertrophic)                                                                                                                                                                                                                             | fulgent |           |                             |  | GeneDx |                              | no excess                                  |  | (Cardiomyopathy, dilated)                                                                                                                                                                                                                                                                                                                                                                                             | Invitae-preliminary evidence | mayo_AD_DCM                                                                          |
| LAMP2    | (HCM, test DCM/LVNC)                             | metabolic mimic                                                                                                                         | no excess                                      | (cardiomyopathy, hypertrophic)                                                                                                                                                                                                                             | fulgent | centogene | mayo_X-linked_Danon disease |  | GeneDx | Invitae-primary panel        | no excess                                  |  | (Cardiomyopathy, dilated)                                                                                                                                                                                                                                                                                                                                                                                             | Invitae-primary panel        | mayo_X-linked_Danon disease                                                          |
| LDB3     |                                                  |                                                                                                                                         | functional data only                           | (cardiomyopathy, hypertrophic)                                                                                                                                                                                                                             | fulgent | centogene |                             |  | GeneDx | Invitae-preliminary evidence | no excess                                  |  | (Cardiomyopathy, dilated)                                                                                                                                                                                                                                                                                                                                                                                             | Invitae-preliminary evidence | mayo_AD_DCM, LVNC, myofibrillar myopathy                                             |
| ldb32    |                                                  |                                                                                                                                         |                                                |                                                                                                                                                                                                                                                            |         |           |                             |  |        |                              |                                            |  | (Cardiomyopathy, dilated)                                                                                                                                                                                                                                                                                                                                                                                             |                              |                                                                                      |
| ldb36    |                                                  |                                                                                                                                         |                                                |                                                                                                                                                                                                                                                            |         |           |                             |  |        |                              |                                            |  | (Cardiomyopathy, dilated)                                                                                                                                                                                                                                                                                                                                                                                             |                              |                                                                                      |
| ldb34    |                                                  | (Left ventricular noncompaction)                                                                                                        |                                                | (cardiomyopathy, hypertrophic)                                                                                                                                                                                                                             |         |           |                             |  |        |                              |                                            |  | (Cardiomyopathy, dilated)                                                                                                                                                                                                                                                                                                                                                                                             |                              |                                                                                      |
| LMNA     | (DCM, test LVNC)                                 | (Cardiomyopathy, left ventricular noncompaction);(Left ventricular noncompaction)                                                       | no evidence (variant too common)               | (cardiomyopathy, hypertrophic)                                                                                                                                                                                                                             | fulgent |           |                             |  | GeneDx |                              | Nontruncating excess and Truncating excess |  | (Atrioventricular block with normal QRS interval and dilated cardiomyopathy); (Dilated cardiomyopathy / ventricular arrhythmia); (Dilated cardiomyopathy and limb-girdle muscular dystrophy 1B); (Lipodystrophy, mandibular dysplasia and dilated cardiomyopathy);(Ovarian failure and dilated cardiomyopathy);(Partial lipodystrophy, dilated cardiomyopathy & conduction system disease); (Cardiomyopathy, dilated) | Invitae-primary panel        | mayo_AD_AR_DCM, EMO, LGMD, congenital muscular dystrophy (see OMIM for full listing) |
| lnna2    |                                                  |                                                                                                                                         |                                                |                                                                                                                                                                                                                                                            |         |           |                             |  |        |                              |                                            |  | (Cardiomyopathy, dilated)                                                                                                                                                                                                                                                                                                                                                                                             |                              |                                                                                      |
| LRR10    |                                                  |                                                                                                                                         |                                                |                                                                                                                                                                                                                                                            |         |           |                             |  | GeneDx |                              |                                            |  | (Cardiomyopathy, dilated)                                                                                                                                                                                                                                                                                                                                                                                             | Invitae-preliminary evidence |                                                                                      |
| MAP2K1   |                                                  |                                                                                                                                         |                                                | (cardiomyopathy, hypertrophic)                                                                                                                                                                                                                             | fulgent |           |                             |  | GeneDx | Invitae-RASopathy            |                                            |  |                                                                                                                                                                                                                                                                                                                                                                                                                       | Invitae-RASopathy            |                                                                                      |
| MAP2K2   |                                                  |                                                                                                                                         |                                                | (cardiomyopathy, hypertrophic)                                                                                                                                                                                                                             | fulgent |           |                             |  | GeneDx | Invitae-RASopathy            |                                            |  |                                                                                                                                                                                                                                                                                                                                                                                                                       | Invitae-RASopathy            |                                                                                      |
| MED12    |                                                  |                                                                                                                                         |                                                |                                                                                                                                                                                                                                                            |         |           |                             |  |        |                              |                                            |  |                                                                                                                                                                                                                                                                                                                                                                                                                       | Invitae-preliminary evidence |                                                                                      |
| MIB1     |                                                  |                                                                                                                                         |                                                | (cardiomyopathy, hypertrophic)                                                                                                                                                                                                                             |         |           |                             |  | GeneDx |                              |                                            |  |                                                                                                                                                                                                                                                                                                                                                                                                                       |                              |                                                                                      |
| MIB2     |                                                  | (Left ventricular noncompaction)                                                                                                        |                                                |                                                                                                                                                                                                                                                            |         |           |                             |  |        |                              |                                            |  |                                                                                                                                                                                                                                                                                                                                                                                                                       |                              |                                                                                      |
| MIR196A2 |                                                  |                                                                                                                                         |                                                |                                                                                                                                                                                                                                                            |         |           |                             |  |        |                              |                                            |  | (Dilated cardiomyopathy, association with)                                                                                                                                                                                                                                                                                                                                                                            |                              |                                                                                      |
| MIR499A  |                                                  |                                                                                                                                         |                                                |                                                                                                                                                                                                                                                            |         |           |                             |  |        |                              |                                            |  | (Dilated cardiomyopathy, association with)                                                                                                                                                                                                                                                                                                                                                                            |                              |                                                                                      |
| MRPL3    |                                                  | rare, recessive, phenocopy                                                                                                              |                                                | (cardiomyopathy, hypertrophic)                                                                                                                                                                                                                             |         |           |                             |  |        |                              |                                            |  |                                                                                                                                                                                                                                                                                                                                                                                                                       |                              |                                                                                      |
| MRPL44   |                                                  |                                                                                                                                         |                                                | (Hypertrophic cardiomyopathy, childhood-onset)                                                                                                                                                                                                             |         |           |                             |  |        |                              |                                            |  |                                                                                                                                                                                                                                                                                                                                                                                                                       |                              |                                                                                      |
| MTND1    |                                                  |                                                                                                                                         |                                                |                                                                                                                                                                                                                                                            |         |           |                             |  | GeneDx |                              |                                            |  |                                                                                                                                                                                                                                                                                                                                                                                                                       |                              |                                                                                      |
| MTND5    |                                                  |                                                                                                                                         |                                                |                                                                                                                                                                                                                                                            |         |           |                             |  | GeneDx |                              |                                            |  |                                                                                                                                                                                                                                                                                                                                                                                                                       |                              |                                                                                      |
| MTND6    |                                                  |                                                                                                                                         |                                                |                                                                                                                                                                                                                                                            |         |           |                             |  | GeneDx |                              |                                            |  |                                                                                                                                                                                                                                                                                                                                                                                                                       |                              |                                                                                      |

|         |                                            |                                                                                                                                                                                                                                                                                                                                                                                                                                                 |                                                                                                                    |                                            |                                                                                                                                                                                                                                                                                                                                               |         |           |                                  |  |        |                                               |                      |                                                                                                                                |                              |                                  |
|---------|--------------------------------------------|-------------------------------------------------------------------------------------------------------------------------------------------------------------------------------------------------------------------------------------------------------------------------------------------------------------------------------------------------------------------------------------------------------------------------------------------------|--------------------------------------------------------------------------------------------------------------------|--------------------------------------------|-----------------------------------------------------------------------------------------------------------------------------------------------------------------------------------------------------------------------------------------------------------------------------------------------------------------------------------------------|---------|-----------|----------------------------------|--|--------|-----------------------------------------------|----------------------|--------------------------------------------------------------------------------------------------------------------------------|------------------------------|----------------------------------|
| MT01    |                                            |                                                                                                                                                                                                                                                                                                                                                                                                                                                 |                                                                                                                    |                                            | (Hypertrophic cardiomyopathy, lactic acidosis and respiratory chain deficiency);(Hypertrophic cardiomyopathy & lactic acidosis)                                                                                                                                                                                                               | fulgent |           |                                  |  |        | Invitae-AR syndromic pediatric cardiomyopathy |                      | Invitae-AR syndromic pediatric cardiomyopathy                                                                                  |                              |                                  |
| MTD     |                                            |                                                                                                                                                                                                                                                                                                                                                                                                                                                 |                                                                                                                    |                                            |                                                                                                                                                                                                                                                                                                                                               |         |           |                                  |  | GeneDx |                                               |                      |                                                                                                                                |                              |                                  |
| MTTG    |                                            |                                                                                                                                                                                                                                                                                                                                                                                                                                                 |                                                                                                                    |                                            |                                                                                                                                                                                                                                                                                                                                               |         |           |                                  |  | GeneDx |                                               |                      |                                                                                                                                |                              |                                  |
| MTTH    |                                            |                                                                                                                                                                                                                                                                                                                                                                                                                                                 |                                                                                                                    |                                            |                                                                                                                                                                                                                                                                                                                                               |         |           |                                  |  | GeneDx |                                               |                      |                                                                                                                                |                              |                                  |
| MTI     |                                            |                                                                                                                                                                                                                                                                                                                                                                                                                                                 |                                                                                                                    |                                            |                                                                                                                                                                                                                                                                                                                                               |         |           |                                  |  | GeneDx |                                               |                      |                                                                                                                                |                              |                                  |
| MTK     |                                            |                                                                                                                                                                                                                                                                                                                                                                                                                                                 |                                                                                                                    |                                            |                                                                                                                                                                                                                                                                                                                                               |         |           |                                  |  | GeneDx |                                               |                      |                                                                                                                                |                              |                                  |
| MTTL    |                                            |                                                                                                                                                                                                                                                                                                                                                                                                                                                 |                                                                                                                    |                                            |                                                                                                                                                                                                                                                                                                                                               |         |           |                                  |  | GeneDx |                                               |                      |                                                                                                                                |                              |                                  |
| MTTL2   |                                            |                                                                                                                                                                                                                                                                                                                                                                                                                                                 |                                                                                                                    |                                            |                                                                                                                                                                                                                                                                                                                                               |         |           |                                  |  | GeneDx |                                               |                      |                                                                                                                                |                              |                                  |
| MTM     |                                            |                                                                                                                                                                                                                                                                                                                                                                                                                                                 |                                                                                                                    |                                            |                                                                                                                                                                                                                                                                                                                                               |         |           |                                  |  | GeneDx |                                               |                      |                                                                                                                                |                              |                                  |
| MTQ     |                                            |                                                                                                                                                                                                                                                                                                                                                                                                                                                 |                                                                                                                    |                                            |                                                                                                                                                                                                                                                                                                                                               |         |           |                                  |  | GeneDx |                                               |                      |                                                                                                                                |                              |                                  |
| MTS1    |                                            |                                                                                                                                                                                                                                                                                                                                                                                                                                                 |                                                                                                                    |                                            |                                                                                                                                                                                                                                                                                                                                               |         |           |                                  |  | GeneDx |                                               |                      |                                                                                                                                |                              |                                  |
| MTS2    |                                            |                                                                                                                                                                                                                                                                                                                                                                                                                                                 |                                                                                                                    |                                            |                                                                                                                                                                                                                                                                                                                                               |         |           |                                  |  | GeneDx |                                               |                      |                                                                                                                                |                              |                                  |
| MURC    |                                            |                                                                                                                                                                                                                                                                                                                                                                                                                                                 |                                                                                                                    |                                            |                                                                                                                                                                                                                                                                                                                                               |         |           |                                  |  | GeneDx |                                               |                      |                                                                                                                                |                              |                                  |
| MYBPC3  | (HCM, test DCM/LVNC); (secondary finding)  | (Cardiomyopathy, dilated with left ventricular noncompaction); (Cardiomyopathy, left ventricular noncompaction); (Hypertrophic cardiomyopathy and left ventricular noncompaction);(Left ventricular noncompaction)                                                                                                                                                                                                                              | sarcomere, validated                                                                                               | Nontruncating excess and Truncating excess | (Hypertrophic cardiomyopathy, in Potocki Schaffer syndrome); (Hypertrophic cardiomyopathy, apical);(Hypertrophic cardiomyopathy with inclusion body myositis);(Hypertrophic cardiomyopathy and left ventricular noncompaction); (Hypertrophic cardiomyopathy and atrial fibrillation); (cardiomyopathy, hypertrophic); (arrhythmic CM or HCM) | fulgent | centogene | mayo_AD_HCM, DCM                 |  | GeneDx | Invitae-primary panel                         | no excess            | (Dilated cardiomyopathy, hearing loss & developmental delay); (Dilated cardiomyopathy); (Cardiomyopathy, dilated)              | Invitae-primary panel        | mayo_AD_HCM, DCM                 |
| MYBPHL  |                                            |                                                                                                                                                                                                                                                                                                                                                                                                                                                 |                                                                                                                    |                                            |                                                                                                                                                                                                                                                                                                                                               |         |           |                                  |  |        |                                               |                      | (Dilated cardiomyopathy & arrhythmias)                                                                                         |                              |                                  |
| MYH15   |                                            |                                                                                                                                                                                                                                                                                                                                                                                                                                                 |                                                                                                                    |                                            | (cardiomyopathy, hypertrophic)                                                                                                                                                                                                                                                                                                                |         |           |                                  |  |        |                                               |                      |                                                                                                                                |                              |                                  |
| MYH6    |                                            |                                                                                                                                                                                                                                                                                                                                                                                                                                                 | weak: excess but no strong segregation data                                                                        |                                            | (cardiomyopathy, hypertrophic); (Hypertrophic cardiomyopathy)                                                                                                                                                                                                                                                                                 | fulgent | centogene |                                  |  | GeneDx | Invitae-preliminary evidence                  | no excess            | (Cardiomyopathy, dilated)                                                                                                      | Invitae-preliminary evidence | mayo_HCM, DCM                    |
| MYH7    | (HCM);(DCM, test LVNC);(secondary finding) | (Cardiomyopathy, left ventricular noncompaction);(Einstein anomaly, left ventricular noncompaction, and ventricular septal defect); (Left ventricular noncompaction); (Cardiomyopathy, left ventricular noncompaction with heart block);(Hypertrophic cardiomyopathy and left ventricular noncompaction cardiomyopathy and coronary artery-left ventricular fistulae);(Large distal myopathy and left ventricular noncompaction cardiomyopathy) | sarcomere, validated                                                                                               | Nontruncating excess                       | (Hypertrophic cardiomyopathy, long QT and atrial fibrillation); (Hypertrophic cardiomyopathy with left ventricular noncompaction cardiomyopathy and coronary artery-left ventricular fistulae); (cardiomyopathy, hypertrophic); (Hypertrophic cardiomyopathy with cranial, axial and proximal myopathy)                                       | fulgent | centogene | mayo_AD_HCM, DCM, LVNC, myopathy |  | GeneDx | Invitae-primary panel                         | Nontruncating excess | (Core myopathy, dilated cardiomyopathy, respiratory failure & scoliosis); (Cardiomyopathy, dilated)                            | Invitae-primary panel        | mayo_AD_HCM, DCM, LVNC, myopathy |
| MYH7B   |                                            | (Cardiomyopathy, left ventricular noncompaction)                                                                                                                                                                                                                                                                                                                                                                                                |                                                                                                                    |                                            |                                                                                                                                                                                                                                                                                                                                               |         |           |                                  |  |        |                                               |                      |                                                                                                                                |                              |                                  |
| MYL2    | (HCM, test DCM/LVNC); (secondary finding)  |                                                                                                                                                                                                                                                                                                                                                                                                                                                 | sarcomere, validated                                                                                               | Nontruncating excess                       | (cardiomyopathy, hypertrophic)                                                                                                                                                                                                                                                                                                                | fulgent | centogene | mayo_AD_HCM                      |  | GeneDx | Invitae-primary panel                         | no excess            | (Cardiomyopathy, dilated)                                                                                                      | Invitae-primary panel        |                                  |
| MYL3    | (HCM, test DCM/LVNC); (secondary finding)  |                                                                                                                                                                                                                                                                                                                                                                                                                                                 | sarcomere, validated                                                                                               | Nontruncating excess                       | (cardiomyopathy, hypertrophic); (Hypertrophic cardiomyopathy)                                                                                                                                                                                                                                                                                 | fulgent | centogene | mayo_AD_AR_HCM                   |  | GeneDx | Invitae-primary panel                         | no excess            | (Cardiomyopathy, dilated)                                                                                                      | Invitae-primary panel        |                                  |
| MYL2    |                                            |                                                                                                                                                                                                                                                                                                                                                                                                                                                 | functional data only                                                                                               |                                            | (cardiomyopathy, hypertrophic)                                                                                                                                                                                                                                                                                                                | fulgent | centogene | mayo_AD_HCM                      |  | GeneDx | Invitae-preliminary evidence                  | no excess            | (Cardiomyopathy, dilated)                                                                                                      | Invitae-preliminary evidence |                                  |
| MYO6    |                                            |                                                                                                                                                                                                                                                                                                                                                                                                                                                 | rare, recessive, pleiotropy                                                                                        |                                            |                                                                                                                                                                                                                                                                                                                                               |         |           |                                  |  |        |                                               |                      |                                                                                                                                |                              |                                  |
| MYO1    |                                            |                                                                                                                                                                                                                                                                                                                                                                                                                                                 | functional data only                                                                                               |                                            | (cardiomyopathy, hypertrophic)                                                                                                                                                                                                                                                                                                                | fulgent |           |                                  |  |        | Invitae-preliminary evidence                  |                      | (Cardiomyopathy, dilated)                                                                                                      | Invitae-preliminary evidence |                                  |
| MYO3    |                                            |                                                                                                                                                                                                                                                                                                                                                                                                                                                 |                                                                                                                    |                                            |                                                                                                                                                                                                                                                                                                                                               |         |           |                                  |  |        |                                               |                      | (Cardiomyopathy, dilated)                                                                                                      |                              |                                  |
| MYO2    |                                            |                                                                                                                                                                                                                                                                                                                                                                                                                                                 | moderate: no excess but human evidence -> very rare that mutation in this gene is causative, most mutations benign | no excess                                  | (cardiomyopathy, hypertrophic)                                                                                                                                                                                                                                                                                                                | fulgent |           | mayo_AD_HCM                      |  | GeneDx | Invitae-preliminary evidence                  | no excess            |                                                                                                                                | Invitae-preliminary evidence |                                  |
| MPN     |                                            |                                                                                                                                                                                                                                                                                                                                                                                                                                                 | functional data only                                                                                               |                                            | (cardiomyopathy, hypertrophic)                                                                                                                                                                                                                                                                                                                | fulgent | centogene |                                  |  | GeneDx | Invitae-preliminary evidence                  |                      | (Cardiomyopathy, dilated)                                                                                                      | Invitae-preliminary evidence | mayo_AD_HCM, DCM                 |
| NAA10   |                                            |                                                                                                                                                                                                                                                                                                                                                                                                                                                 |                                                                                                                    |                                            | (Developmental delay & hypertrophic cardiomyopathy)                                                                                                                                                                                                                                                                                           |         |           |                                  |  |        |                                               |                      |                                                                                                                                |                              |                                  |
| NCOA6   |                                            |                                                                                                                                                                                                                                                                                                                                                                                                                                                 |                                                                                                                    |                                            |                                                                                                                                                                                                                                                                                                                                               |         |           |                                  |  |        |                                               |                      | (Cardiomyopathy, dilated)                                                                                                      |                              |                                  |
| NDUF41  |                                            |                                                                                                                                                                                                                                                                                                                                                                                                                                                 |                                                                                                                    |                                            | (Hypertrophic cardiomyopathy, fatal infantile)                                                                                                                                                                                                                                                                                                |         |           |                                  |  |        |                                               |                      |                                                                                                                                |                              |                                  |
| NDUFV2  |                                            |                                                                                                                                                                                                                                                                                                                                                                                                                                                 |                                                                                                                    |                                            | (Hypertrophic cardiomyopathy and encephalopathy)                                                                                                                                                                                                                                                                                              |         |           |                                  |  |        |                                               |                      | (Cardiomyopathy, dilated)                                                                                                      |                              |                                  |
| NEB     |                                            |                                                                                                                                                                                                                                                                                                                                                                                                                                                 |                                                                                                                    |                                            | (cardiomyopathy, hypertrophic)                                                                                                                                                                                                                                                                                                                |         |           |                                  |  |        |                                               |                      |                                                                                                                                |                              |                                  |
| NEBL    |                                            |                                                                                                                                                                                                                                                                                                                                                                                                                                                 |                                                                                                                    |                                            | (cardiomyopathy, hypertrophic)                                                                                                                                                                                                                                                                                                                | fulgent |           |                                  |  | GeneDx |                                               |                      | (Cardiomyopathy, dilated)                                                                                                      | Invitae-preliminary evidence |                                  |
| NEXN    |                                            | (Cardiomyopathy, left ventricular noncompaction)                                                                                                                                                                                                                                                                                                                                                                                                | functional data only                                                                                               | no excess                                  | (cardiomyopathy, hypertrophic)                                                                                                                                                                                                                                                                                                                | fulgent | centogene | mayo_AD_HCM, DCM                 |  | GeneDx | Invitae-preliminary evidence                  | no excess            | (Cardiomyopathy, dilated)                                                                                                      | Invitae-preliminary evidence | mayo_AD_HCM, DCM                 |
| NF1     |                                            |                                                                                                                                                                                                                                                                                                                                                                                                                                                 |                                                                                                                    |                                            |                                                                                                                                                                                                                                                                                                                                               | fulgent |           |                                  |  |        | Invitae-RASopathy                             |                      |                                                                                                                                | Invitae-RASopathy            |                                  |
| NFKB1   |                                            |                                                                                                                                                                                                                                                                                                                                                                                                                                                 |                                                                                                                    |                                            |                                                                                                                                                                                                                                                                                                                                               |         |           |                                  |  |        |                                               |                      | (Dilated cardiomyopathy risk)                                                                                                  |                              |                                  |
| NKX2-5  |                                            |                                                                                                                                                                                                                                                                                                                                                                                                                                                 |                                                                                                                    |                                            |                                                                                                                                                                                                                                                                                                                                               |         |           |                                  |  | GeneDx |                                               |                      | (Dilated cardiomyopathy & arrhythmias); (Cardiomyopathy, dilated)                                                              | Invitae-preliminary evidence |                                  |
| NPPA    |                                            |                                                                                                                                                                                                                                                                                                                                                                                                                                                 |                                                                                                                    |                                            |                                                                                                                                                                                                                                                                                                                                               |         |           |                                  |  |        |                                               |                      | (Cardiomyopathy, dilated)                                                                                                      | Invitae-preliminary evidence |                                  |
| NRAP    |                                            |                                                                                                                                                                                                                                                                                                                                                                                                                                                 |                                                                                                                    |                                            |                                                                                                                                                                                                                                                                                                                                               |         |           |                                  |  |        |                                               |                      |                                                                                                                                |                              |                                  |
| NRAS    |                                            |                                                                                                                                                                                                                                                                                                                                                                                                                                                 |                                                                                                                    |                                            |                                                                                                                                                                                                                                                                                                                                               | fulgent |           |                                  |  | GeneDx | Invitae-RASopathy                             |                      |                                                                                                                                | Invitae-RASopathy            |                                  |
| OBSCN   |                                            |                                                                                                                                                                                                                                                                                                                                                                                                                                                 | no evidence (variant too common)                                                                                   |                                            | (cardiomyopathy, hypertrophic)                                                                                                                                                                                                                                                                                                                |         |           |                                  |  |        |                                               |                      | (Cardiomyopathy, dilated)                                                                                                      |                              |                                  |
| obsch2  |                                            |                                                                                                                                                                                                                                                                                                                                                                                                                                                 |                                                                                                                    |                                            | (cardiomyopathy, hypertrophic)                                                                                                                                                                                                                                                                                                                |         |           |                                  |  |        |                                               |                      | (Cardiomyopathy, dilated)                                                                                                      |                              |                                  |
| OBSL1   |                                            |                                                                                                                                                                                                                                                                                                                                                                                                                                                 |                                                                                                                    |                                            |                                                                                                                                                                                                                                                                                                                                               |         |           |                                  |  |        |                                               |                      | (Cardiomyopathy, dilated)                                                                                                      |                              |                                  |
| obsl1v3 |                                            |                                                                                                                                                                                                                                                                                                                                                                                                                                                 |                                                                                                                    |                                            |                                                                                                                                                                                                                                                                                                                                               |         |           |                                  |  |        |                                               |                      | (Cardiomyopathy, dilated)                                                                                                      |                              |                                  |
| ORA1    |                                            |                                                                                                                                                                                                                                                                                                                                                                                                                                                 |                                                                                                                    |                                            | (Infantile mitochondrial encephalomyopathy, hypertrophic cardiomyopathy with optic atrophy)                                                                                                                                                                                                                                                   |         |           |                                  |  |        |                                               |                      |                                                                                                                                |                              |                                  |
| PARS2   |                                            |                                                                                                                                                                                                                                                                                                                                                                                                                                                 |                                                                                                                    |                                            |                                                                                                                                                                                                                                                                                                                                               |         |           |                                  |  |        |                                               |                      | (Microcephaly, early infantile epileptic encephalopathy, Leigh-like syndrome, dilated cardiomyopathy, and renal insufficiency) |                              |                                  |
| PCCA    |                                            |                                                                                                                                                                                                                                                                                                                                                                                                                                                 |                                                                                                                    |                                            |                                                                                                                                                                                                                                                                                                                                               |         |           |                                  |  |        |                                               |                      | (Propionic acidemia with dilated cardiomyopathy, adult onset)                                                                  |                              |                                  |
| PCCB    |                                            |                                                                                                                                                                                                                                                                                                                                                                                                                                                 |                                                                                                                    |                                            |                                                                                                                                                                                                                                                                                                                                               |         |           |                                  |  |        |                                               |                      | (Propionic acidemia with dilated cardiomyopathy, adult onset)                                                                  |                              |                                  |
| PDLIM3  |                                            |                                                                                                                                                                                                                                                                                                                                                                                                                                                 | no evidence                                                                                                        |                                            | (cardiomyopathy, hypertrophic)                                                                                                                                                                                                                                                                                                                | fulgent | centogene |                                  |  | GeneDx | Invitae-preliminary evidence                  |                      | (Cardiomyopathy, dilated)                                                                                                      | Invitae-preliminary evidence |                                  |
| PKD2    |                                            |                                                                                                                                                                                                                                                                                                                                                                                                                                                 |                                                                                                                    |                                            |                                                                                                                                                                                                                                                                                                                                               |         |           |                                  |  |        |                                               |                      | (Polycystic kidney disease and dilated cardiomyopathy)                                                                         |                              |                                  |
| PKP2    | (ARVC, test DCM/LVNC); (secondary finding) |                                                                                                                                                                                                                                                                                                                                                                                                                                                 |                                                                                                                    |                                            | (cardiomyopathy, hypertrophic); (Hypertrophic cardiomyopathy)                                                                                                                                                                                                                                                                                 | fulgent |           |                                  |  | GeneDx |                                               | no excess            | (Cardiomyopathy, dilated)                                                                                                      | Invitae-primary panel        |                                  |
| PLEKHM2 |                                            | Cardiomyopathy, dilated with left ventricular noncompaction                                                                                                                                                                                                                                                                                                                                                                                     |                                                                                                                    |                                            |                                                                                                                                                                                                                                                                                                                                               |         |           |                                  |  |        |                                               |                      |                                                                                                                                | Invitae-preliminary evidence |                                  |
| PLN     | (HCM);(DCM, test LVNC)                     |                                                                                                                                                                                                                                                                                                                                                                                                                                                 | strong: excess + human genetic evidence                                                                            | Truncating excess                          | (cardiomyopathy, hypertrophic)                                                                                                                                                                                                                                                                                                                | fulgent | centogene | mayo_AD_HCM, DCM                 |  | GeneDx | Invitae-primary panel                         | no excess            | (Cardiomyopathy, dilated)                                                                                                      | Invitae-primary panel        | mayo_AD_HCM, DCM                 |
| PPCS    |                                            |                                                                                                                                                                                                                                                                                                                                                                                                                                                 |                                                                                                                    |                                            |                                                                                                                                                                                                                                                                                                                                               |         |           |                                  |  |        |                                               |                      | (Cardiomyopathy, dilated)                                                                                                      |                              |                                  |
| PRDM16  |                                            | (Left ventricular noncompaction)                                                                                                                                                                                                                                                                                                                                                                                                                |                                                                                                                    |                                            |                                                                                                                                                                                                                                                                                                                                               |         |           |                                  |  |        |                                               |                      | (Cardiomyopathy, dilated)                                                                                                      | Invitae-preliminary evidence |                                  |

|          |                                            |                                                                                                      |                                  |                                            |                                                                                                                                                                                               |         |           |                                              |        |                       |                      |                                                                                                                                                                                                                                                   |                                               |                                                             |
|----------|--------------------------------------------|------------------------------------------------------------------------------------------------------|----------------------------------|--------------------------------------------|-----------------------------------------------------------------------------------------------------------------------------------------------------------------------------------------------|---------|-----------|----------------------------------------------|--------|-----------------------|----------------------|---------------------------------------------------------------------------------------------------------------------------------------------------------------------------------------------------------------------------------------------------|-----------------------------------------------|-------------------------------------------------------------|
| PRKAG2   | (HCM, test DCM/LVNC); (secondary finding)  |                                                                                                      | metabolic mimic                  | Nontruncating excess                       | (cardiomyopathy, hypertrophic)                                                                                                                                                                | fulgent | centogene | mayo_AD_HCM, Waif Parkinson-White syndrome   | GeneDx | Invitae-primary panel | no excess            | (Cardiomyopathy, dilated)                                                                                                                                                                                                                         | Invitae-primary panel                         |                                                             |
| PRNP     |                                            |                                                                                                      |                                  |                                            | (cardiomyopathy, hypertrophic)                                                                                                                                                                |         |           |                                              |        |                       |                      |                                                                                                                                                                                                                                                   |                                               |                                                             |
| PSEN1    |                                            |                                                                                                      |                                  |                                            |                                                                                                                                                                                               |         |           |                                              |        |                       |                      | (Cardiomyopathy, dilated)                                                                                                                                                                                                                         |                                               |                                                             |
| PSEN2    |                                            |                                                                                                      |                                  |                                            |                                                                                                                                                                                               |         |           |                                              |        |                       |                      | (Dilated cardiomyopathy & heart failure); (Cardiomyopathy, dilated)                                                                                                                                                                               |                                               |                                                             |
| PTEN     |                                            | (Cardiomyopathy, left ventricular noncompaction)                                                     |                                  |                                            |                                                                                                                                                                                               |         |           |                                              |        |                       |                      |                                                                                                                                                                                                                                                   |                                               |                                                             |
| PTPN11   |                                            |                                                                                                      |                                  |                                            | Noonan syndrome with multiple lentigenes & hypertrophic cardiomyopathy); (cardiomyopathy, hypertrophic); Noonan syndrome with juvenile myelomonocytic leukemia & hypertrophic cardiomyopathy) | fulgent |           |                                              | GeneDx | Invitae-RASopathy     |                      |                                                                                                                                                                                                                                                   | Invitae-RASopathy                             |                                                             |
| RAF1     |                                            |                                                                                                      |                                  |                                            | (cardiomyopathy, hypertrophic); (Perinatal problems & hypertrophic cardiomyopathy)                                                                                                            | fulgent |           | mayo_AD_Noonan/m ultiple lentigenes syndrome | GeneDx | Invitae-RASopathy     |                      | (Cardiomyopathy, dilated)                                                                                                                                                                                                                         | Invitae-primary panel                         | mayo_AD_Noonan/m ultiple lentigenes syndrome, DCM           |
| RANRF    |                                            |                                                                                                      |                                  |                                            |                                                                                                                                                                                               |         |           |                                              |        |                       |                      | (Cardiomyopathy, dilated)                                                                                                                                                                                                                         |                                               |                                                             |
| RASA1    |                                            |                                                                                                      |                                  |                                            |                                                                                                                                                                                               | fulgent |           |                                              |        | Invitae-RASopathy     |                      |                                                                                                                                                                                                                                                   | Invitae-RASopathy                             |                                                             |
| RBM20    | (DCM, test LVNC)                           |                                                                                                      |                                  |                                            |                                                                                                                                                                                               | fulgent |           |                                              | GeneDx |                       |                      | (Cardiomyopathy, dilated)                                                                                                                                                                                                                         | Invitae-primary panel                         | mayo_AD_DCM                                                 |
| RHO      |                                            |                                                                                                      |                                  |                                            |                                                                                                                                                                                               |         |           |                                              |        |                       |                      | (Cystoid macular edema in retinitis pigmentosa)                                                                                                                                                                                                   |                                               |                                                             |
| RIT1     |                                            |                                                                                                      |                                  |                                            | (cardiomyopathy, hypertrophic)                                                                                                                                                                | fulgent |           |                                              | GeneDx | Invitae-RASopathy     |                      |                                                                                                                                                                                                                                                   | Invitae-RASopathy                             |                                                             |
| RMND1    |                                            |                                                                                                      |                                  |                                            |                                                                                                                                                                                               |         |           |                                              |        |                       |                      | (Chronic kidney disease, dilated cardiomyopathy & neurological involvement)                                                                                                                                                                       |                                               |                                                             |
| RRAGC    |                                            |                                                                                                      |                                  |                                            |                                                                                                                                                                                               |         |           |                                              |        |                       |                      | (Cardiomyopathy, dilated)                                                                                                                                                                                                                         |                                               |                                                             |
| RRAS     |                                            |                                                                                                      |                                  |                                            |                                                                                                                                                                                               | fulgent |           |                                              |        | Invitae-RASopathy     |                      |                                                                                                                                                                                                                                                   | Invitae-RASopathy                             |                                                             |
| RTKN2    |                                            |                                                                                                      |                                  |                                            |                                                                                                                                                                                               |         |           |                                              |        |                       |                      | (Cardiomyopathy, dilated)                                                                                                                                                                                                                         |                                               |                                                             |
| RYR2     | (ARVC, test DCM/LVNC); (secondary finding) | (Left ventricular noncompaction)                                                                     |                                  |                                            | (cardiomyopathy, hypertrophic)                                                                                                                                                                | fulgent |           |                                              | GeneDx |                       | no excess            | (Cardiomyopathy, dilated)                                                                                                                                                                                                                         | Invitae-primary panel                         |                                                             |
| SCN5A    | (DCM, test LVNC); (secondary finding)      |                                                                                                      |                                  |                                            | (cardiomyopathy, hypertrophic); (Hypertrophic cardiomyopathy)                                                                                                                                 | fulgent |           |                                              | GeneDx |                       | Truncating excess    | (Dilated cardiomyopathy and long QT syndrome);(Long QT syndrome 3 & dilated cardiomyopathy);(Long QT syndrome and dilated cardiomyopathy);(LQTS, conduction disorder, dilated cardiomyopathy);(Dilated cardiomyopathy); (Cardiomyopathy, dilated) | Invitae-primary panel                         | mayo_AD_Brugada syndrome, DCM, Heart block, LQTS, SSS, SIDS |
| scn5ab   |                                            |                                                                                                      |                                  |                                            |                                                                                                                                                                                               |         |           |                                              |        |                       |                      | (Cardiomyopathy, dilated)                                                                                                                                                                                                                         |                                               |                                                             |
| scn5aie  |                                            |                                                                                                      |                                  |                                            |                                                                                                                                                                                               |         |           |                                              |        |                       |                      | (Cardiomyopathy, dilated)                                                                                                                                                                                                                         |                                               |                                                             |
| SDHA     |                                            |                                                                                                      |                                  |                                            |                                                                                                                                                                                               |         |           |                                              |        |                       |                      |                                                                                                                                                                                                                                                   | Invitae-AR syndromic pediatric cardiomyopathy |                                                             |
| SGCB     |                                            |                                                                                                      |                                  |                                            |                                                                                                                                                                                               |         |           |                                              |        |                       |                      | (Cardiomyopathy, dilated)                                                                                                                                                                                                                         |                                               |                                                             |
| SGCD     |                                            |                                                                                                      |                                  |                                            |                                                                                                                                                                                               | fulgent |           |                                              | GeneDx |                       | no excess            | (Cardiomyopathy, dilated)                                                                                                                                                                                                                         | Invitae-primary panel                         | mayo_AD_AR_DCM, LGMD                                        |
| sgcdp    |                                            |                                                                                                      |                                  |                                            |                                                                                                                                                                                               |         |           |                                              |        |                       |                      | (Cardiomyopathy, dilated)                                                                                                                                                                                                                         |                                               |                                                             |
| SHOC2    |                                            |                                                                                                      |                                  |                                            | (Noonan syndrome with foetal distress & hypertrophic cardiomyopathy)                                                                                                                          | fulgent |           |                                              | GeneDx | Invitae-RASopathy     |                      |                                                                                                                                                                                                                                                   | Invitae-RASopathy                             |                                                             |
| SLC22A5  |                                            |                                                                                                      |                                  |                                            |                                                                                                                                                                                               |         |           |                                              |        |                       |                      |                                                                                                                                                                                                                                                   | Invitae-primary panel                         |                                                             |
| SLC25A3  |                                            |                                                                                                      |                                  |                                            | (Muscular hypotonia & hypertrophic cardiomyopathy)                                                                                                                                            |         |           |                                              |        |                       |                      |                                                                                                                                                                                                                                                   |                                               |                                                             |
| SLC25A4  |                                            |                                                                                                      |                                  |                                            | (Mitochondrial myopathy & hypertrophic cardiomyopathy)                                                                                                                                        |         |           | centogene                                    |        |                       |                      |                                                                                                                                                                                                                                                   |                                               |                                                             |
| SLC25A5  |                                            |                                                                                                      | rare, recessive, phenocopy       |                                            |                                                                                                                                                                                               |         |           |                                              |        |                       |                      |                                                                                                                                                                                                                                                   |                                               |                                                             |
| SLC35A2  |                                            |                                                                                                      |                                  |                                            | (Congenital disorder of glycosylation 2m with hypertrophic cardiomyopathy, hearing loss and short stature)                                                                                    |         |           |                                              |        |                       |                      |                                                                                                                                                                                                                                                   |                                               |                                                             |
| SMC1A    |                                            | (Cornelia de Lange syndrome, left ventricular noncompaction cardiomyopathy, hyperopia and cleft lip) |                                  |                                            |                                                                                                                                                                                               |         |           |                                              |        |                       |                      |                                                                                                                                                                                                                                                   |                                               |                                                             |
| SNTA1    |                                            |                                                                                                      |                                  |                                            |                                                                                                                                                                                               |         |           |                                              |        |                       |                      | (Cardiomyopathy, dilated)                                                                                                                                                                                                                         |                                               |                                                             |
| SOD2     |                                            |                                                                                                      |                                  |                                            | (Multiple chemical sensitivity, association with)                                                                                                                                             |         |           |                                              |        |                       |                      |                                                                                                                                                                                                                                                   |                                               |                                                             |
| SOS1     |                                            |                                                                                                      |                                  |                                            | (cardiomyopathy, hypertrophic)                                                                                                                                                                | fulgent | centogene |                                              | GeneDx | Invitae-RASopathy     |                      |                                                                                                                                                                                                                                                   | Invitae-RASopathy                             |                                                             |
| SOS2     |                                            |                                                                                                      |                                  |                                            |                                                                                                                                                                                               | fulgent |           |                                              |        | Invitae-RASopathy     |                      |                                                                                                                                                                                                                                                   | Invitae-RASopathy                             |                                                             |
| SPEG     |                                            |                                                                                                      |                                  |                                            |                                                                                                                                                                                               |         |           |                                              |        |                       |                      | (Centronuclear myopathy with dilated cardiomyopathy)                                                                                                                                                                                              |                                               |                                                             |
| SPRED1   |                                            |                                                                                                      |                                  |                                            |                                                                                                                                                                                               | fulgent |           |                                              |        | Invitae-RASopathy     |                      |                                                                                                                                                                                                                                                   | Invitae-RASopathy                             |                                                             |
| SRI      |                                            |                                                                                                      | no evidence (variant too common) |                                            |                                                                                                                                                                                               |         |           |                                              |        |                       |                      |                                                                                                                                                                                                                                                   |                                               |                                                             |
| STN1     |                                            |                                                                                                      |                                  |                                            | (Mean corpuscular hemoglobin, association with)                                                                                                                                               |         |           |                                              |        |                       |                      |                                                                                                                                                                                                                                                   |                                               |                                                             |
| SYNE1    |                                            |                                                                                                      |                                  |                                            |                                                                                                                                                                                               |         |           |                                              |        |                       |                      | (Cardiomyopathy, dilated)                                                                                                                                                                                                                         |                                               |                                                             |
| SYNE2    |                                            |                                                                                                      |                                  |                                            | (cardiomyopathy, hypertrophic)                                                                                                                                                                |         |           |                                              |        |                       |                      |                                                                                                                                                                                                                                                   |                                               |                                                             |
| SYNM     |                                            |                                                                                                      |                                  |                                            |                                                                                                                                                                                               |         |           |                                              |        |                       |                      | (Cardiomyopathy, dilated)                                                                                                                                                                                                                         |                                               |                                                             |
| TAF1A    |                                            |                                                                                                      |                                  |                                            |                                                                                                                                                                                               |         |           |                                              |        |                       |                      | (Cardiomyopathy, dilated)                                                                                                                                                                                                                         |                                               |                                                             |
| TAZ      |                                            | (Left ventricular noncompaction)                                                                     |                                  |                                            | (cardiomyopathy, hypertrophic)                                                                                                                                                                | fulgent |           |                                              | GeneDx |                       | no excess            | (Dilated cardiomyopathy, recurrent cardiac insufficiency, and multiple respiratory chain complex deficiency);(Barth syndrome with dilated cardiomyopathy); (Cardiomyopathy, dilated)                                                              | Invitae-primary panel                         | mayo_X-linked Barth syndrome, LVNC, DCM                     |
| TBK20    |                                            |                                                                                                      |                                  |                                            |                                                                                                                                                                                               |         |           |                                              | GeneDx |                       |                      | (Cardiomyopathy, dilated)                                                                                                                                                                                                                         |                                               |                                                             |
| TBX5     |                                            |                                                                                                      |                                  |                                            |                                                                                                                                                                                               |         |           |                                              |        |                       |                      | (Cardiomyopathy, dilated)                                                                                                                                                                                                                         |                                               |                                                             |
| TCAP     |                                            |                                                                                                      | functional data only             |                                            | (cardiomyopathy, hypertrophic)                                                                                                                                                                | fulgent | centogene | mayo_AD_AR_HCM, DCM, LGMD                    | GeneDx | Invitae-primary panel | Nontruncating excess | (Cardiomyopathy, dilated)                                                                                                                                                                                                                         | Invitae-primary panel                         | mayo_AD_AR_HCM, DCM, LGMD                                   |
| TCF21    |                                            |                                                                                                      |                                  |                                            |                                                                                                                                                                                               |         |           |                                              |        |                       |                      | (Cardiomyopathy, dilated)                                                                                                                                                                                                                         |                                               |                                                             |
| TFRC     |                                            |                                                                                                      |                                  |                                            | (Mean cell haemoglobin, association with)                                                                                                                                                     |         |           |                                              |        |                       |                      |                                                                                                                                                                                                                                                   |                                               |                                                             |
| TGFβ3    |                                            |                                                                                                      |                                  |                                            |                                                                                                                                                                                               |         |           |                                              | GeneDx |                       |                      | (Cardiomyopathy, dilated)                                                                                                                                                                                                                         | Invitae-preliminary evidence                  |                                                             |
| TK2      |                                            |                                                                                                      |                                  |                                            | (Hypertrophic cardiomyopathy, regression of gross motor development, leucoencephalopathy and hepatic steatosis)                                                                               |         |           |                                              |        |                       |                      |                                                                                                                                                                                                                                                   |                                               |                                                             |
| TMED4    |                                            |                                                                                                      |                                  |                                            |                                                                                                                                                                                               |         |           |                                              |        |                       |                      | (Cardiomyopathy, dilated)                                                                                                                                                                                                                         |                                               |                                                             |
| TMEM43   | (ARVC, test DCM/LVNC); (secondary finding) |                                                                                                      |                                  |                                            | (cardiomyopathy, hypertrophic)                                                                                                                                                                | fulgent |           |                                              | GeneDx |                       | no excess            | (Cardiomyopathy, dilated)                                                                                                                                                                                                                         | Invitae-primary panel                         |                                                             |
| TMEM70   |                                            |                                                                                                      |                                  |                                            |                                                                                                                                                                                               |         |           |                                              |        |                       |                      |                                                                                                                                                                                                                                                   | Invitae-AR syndromic pediatric cardiomyopathy |                                                             |
| TMPO     |                                            |                                                                                                      |                                  |                                            | (cardiomyopathy, hypertrophic)                                                                                                                                                                | fulgent |           |                                              | GeneDx |                       |                      | (Cardiomyopathy, dilated)                                                                                                                                                                                                                         | Invitae-preliminary evidence                  |                                                             |
| TMPS56   |                                            |                                                                                                      |                                  |                                            | (Mean cell haemoglobin, association with)                                                                                                                                                     |         |           |                                              |        |                       |                      |                                                                                                                                                                                                                                                   |                                               |                                                             |
| TNNC1    | (HCM);(DCM, test LVNC)                     |                                                                                                      | weak; genetic evidence           | no excess                                  | (cardiomyopathy, hypertrophic)                                                                                                                                                                | fulgent | centogene | mayo_AD_HCM, DCM                             | GeneDx | Invitae-primary panel | Nontruncating excess | (Cardiomyopathy, dilated)                                                                                                                                                                                                                         | Invitae-primary panel                         | mayo_AD_HCM, DCM                                            |
| TNNI3    | (HCM);(DCM, test LVNC);(secondary finding) | (Left ventricular noncompaction)                                                                     | sarcomere, validated             | Nontruncating excess                       | (cardiomyopathy, hypertrophic)                                                                                                                                                                | fulgent | centogene | mayo_AD_AR_DCM, HCM, RCM                     | GeneDx | Invitae-primary panel | no excess            | (Cardiomyopathy, dilated)                                                                                                                                                                                                                         | Invitae-primary panel                         | mayo_AD_AR_DCM, HCM, RCM                                    |
| TNNI3K   |                                            |                                                                                                      |                                  |                                            |                                                                                                                                                                                               |         |           |                                              |        |                       |                      | (Conduction system disease, atrial tachyarrhythmia & dilated cardiomyopathy)                                                                                                                                                                      |                                               |                                                             |
| TNNI2    | (HCM);(DCM, test LVNC);(secondary finding) | (Cardiomyopathy, left ventricular noncompaction)                                                     | sarcomere, validated             | Nontruncating excess and Truncating excess | (cardiomyopathy, hypertrophic)                                                                                                                                                                | fulgent | centogene | mayo_AD_HCM, DCM, RCM, LVNC                  | GeneDx | Invitae-primary panel | Nontruncating excess | (Dilated cardiomyopathy); (Cardiomyopathy, dilated)                                                                                                                                                                                               | Invitae-primary panel                         | mayo_AD_HCM, DCM, RCM, LVNC                                 |
| trint2v1 |                                            |                                                                                                      |                                  |                                            | (cardiomyopathy, hypertrophic)                                                                                                                                                                |         |           |                                              |        |                       |                      |                                                                                                                                                                                                                                                   |                                               |                                                             |
| TOR1AIP1 |                                            |                                                                                                      |                                  |                                            |                                                                                                                                                                                               |         |           |                                              | GeneDx |                       |                      |                                                                                                                                                                                                                                                   |                                               |                                                             |

|           |                                          |                                                                                |                                                                |                      |                                                                                                                       |         |           |                                             |        |                       |                      |                                                                         |                              |                                             |
|-----------|------------------------------------------|--------------------------------------------------------------------------------|----------------------------------------------------------------|----------------------|-----------------------------------------------------------------------------------------------------------------------|---------|-----------|---------------------------------------------|--------|-----------------------|----------------------|-------------------------------------------------------------------------|------------------------------|---------------------------------------------|
| TPM1      | (HCM);DCM, test LVNC;(secondary finding) | (Ebstein anomaly, left ventricular noncompaction & heart failure, early onset) | sarcomere, validated                                           | Nontruncating excess | (cardiomyopathy, hypertrophic); (Hypertrophic cardiomyopathy with electrical instability typical of Brugada syndrome) | fulgent | centogene | mayo_AD_HCM, DCM, LVNC                      | GeneDx | Invitae-primary panel | Nontruncating excess | (Cardiomyopathy, dilated)                                               | Invitae-primary panel        | mayo_AD_HCM, DCM, LVNC                      |
| tpm1.3    |                                          |                                                                                |                                                                |                      | (cardiomyopathy, hypertrophic)                                                                                        |         |           |                                             |        |                       |                      |                                                                         |                              |                                             |
| tpm1.7b   |                                          |                                                                                |                                                                |                      | (cardiomyopathy, hypertrophic)                                                                                        |         |           |                                             |        |                       |                      |                                                                         |                              |                                             |
| TRIM54    |                                          |                                                                                | no evidence                                                    |                      | (cardiomyopathy, hypertrophic); (Proximal muscle weakness & hypertrophic cardiomyopathy)                              |         |           |                                             |        |                       |                      |                                                                         |                              |                                             |
| TRIM55    |                                          |                                                                                | weak: excess but no strong segregation data, putative modifier |                      | (cardiomyopathy, hypertrophic)                                                                                        |         |           |                                             |        |                       |                      |                                                                         |                              |                                             |
| TRIM63    |                                          |                                                                                | weak: excess but no strong segregation data, putative modifier |                      | (cardiomyopathy, hypertrophic); (Proximal muscle weakness & hypertrophic cardiomyopathy)                              |         | centogene |                                             |        |                       |                      |                                                                         |                              |                                             |
| TTN       | (DCM, test LVNC)                         |                                                                                |                                                                |                      | (cardiomyopathy, hypertrophic)                                                                                        | fulgent | centogene | mayo_AD_AR_HCM, DCM, myopathy               | GeneDx |                       | Truncating excess    | (Cardiomyopathy, dilated)                                               | Invitae-primary panel        | mayo_AD_AR_HCM, DCM, ARVC myopathy          |
| ttnc      |                                          | (Cardiomyopathy, left ventricular noncompaction)                               |                                                                |                      |                                                                                                                       |         |           |                                             |        |                       |                      | (Dilated cardiomyopathy and heart failure); (Cardiomyopathy, dilated)   |                              |                                             |
| ttntv     |                                          |                                                                                |                                                                |                      | (cardiomyopathy, hypertrophic)                                                                                        |         |           |                                             |        |                       |                      | (Cardiomyopathy, dilated)                                               |                              |                                             |
| tttnovex1 |                                          |                                                                                |                                                                |                      |                                                                                                                       |         |           |                                             |        |                       |                      | (Cardiomyopathy, dilated)                                               |                              |                                             |
| tttnovex2 |                                          |                                                                                |                                                                |                      |                                                                                                                       |         |           |                                             |        |                       |                      | (Cardiomyopathy, dilated)                                               |                              |                                             |
| tttnovex3 |                                          | (Cardiomyopathy, left ventricular noncompaction)                               |                                                                |                      |                                                                                                                       |         |           |                                             |        |                       |                      | (Cardiomyopathy, dilated)                                               |                              |                                             |
| tttnv2b   |                                          |                                                                                |                                                                |                      | (cardiomyopathy, hypertrophic)                                                                                        |         |           |                                             |        |                       |                      | (Cardiomyopathy, dilated)                                               |                              |                                             |
| TTR       | (HCM, test DCM/LVNC)                     |                                                                                | metabolic mimic                                                | no excess            | (cardiomyopathy, hypertrophic)                                                                                        | fulgent | centogene | mayo_AD_Transsthyre tin-related amyloidosis | GeneDx | Invitae-primary panel | no excess            | (Cardiomyopathy, dilated)                                               | Invitae-primary panel        | mayo_AD_Transsthyre tin-related amyloidosis |
| TXNRD2    |                                          |                                                                                |                                                                |                      |                                                                                                                       |         |           |                                             | GeneDx |                       |                      | (Cardiomyopathy, dilated)                                               | Invitae-preliminary evidence |                                             |
| VCL       |                                          | (Cardiomyopathy, left ventricular noncompaction, with heart block)             | no evidence (no specific phenotype)                            |                      | (cardiomyopathy, hypertrophic)                                                                                        | fulgent | centogene | mayo_AD_HCM, DCM                            | GeneDx | Invitae-primary panel | Truncating excess    | (Cardiomyopathy, dilated)                                               | Invitae-primary panel        | mayo_AD_HCM, DCM                            |
| VEGFA     |                                          |                                                                                |                                                                |                      | (More severe septal hypertrophy and diastolic dysfunction, in hypertrophic cardiomyopathy, association with)          |         |           |                                             |        |                       |                      |                                                                         |                              |                                             |
| VPS13A    |                                          |                                                                                |                                                                |                      |                                                                                                                       |         |           |                                             |        |                       |                      | (Chorea-acanthocytosis with dilated cardiomyopathy & myopathy)          |                              |                                             |
| xirp2v1   |                                          |                                                                                |                                                                |                      |                                                                                                                       |         |           |                                             |        |                       |                      | (Dilated cardiomyopathy, modifier of)                                   |                              |                                             |
| YWHAE     |                                          | (Left ventricular noncompaction & hypoplasia of the corpus callosum)           |                                                                |                      |                                                                                                                       |         |           |                                             |        |                       |                      |                                                                         |                              |                                             |
| ZBTB17    |                                          |                                                                                |                                                                |                      |                                                                                                                       |         |           |                                             |        |                       |                      | (Cardiomyopathy, dilated)                                               |                              |                                             |
| ZMPSTE24  |                                          |                                                                                |                                                                |                      |                                                                                                                       |         |           |                                             |        |                       |                      | (Metabolic syndrome, ectopic fat accumulation & dilated cardiomyopathy) |                              |                                             |

Table 55

| ID (hg38, UCSC)                          | Gene.refGene | Func.refGene | ExonicFunc.refGene   | avsnp150     | Patient | DiseasePatient | Pathogenicity          | Comment                                                                                                                                                                                                                                                                                                                                                                                                                                                                                                                                                                                                                                                                                                                                                                                                                                                                                                                                                                                                                                                                                                                                                                                                                                                                                                                                                                                                                                                                                                                                                                                                     | Tested    | Found                                      |
|------------------------------------------|--------------|--------------|----------------------|--------------|---------|----------------|------------------------|-------------------------------------------------------------------------------------------------------------------------------------------------------------------------------------------------------------------------------------------------------------------------------------------------------------------------------------------------------------------------------------------------------------------------------------------------------------------------------------------------------------------------------------------------------------------------------------------------------------------------------------------------------------------------------------------------------------------------------------------------------------------------------------------------------------------------------------------------------------------------------------------------------------------------------------------------------------------------------------------------------------------------------------------------------------------------------------------------------------------------------------------------------------------------------------------------------------------------------------------------------------------------------------------------------------------------------------------------------------------------------------------------------------------------------------------------------------------------------------------------------------------------------------------------------------------------------------------------------------|-----------|--------------------------------------------|
| chr11_228212169_228212170_TC_AA          | OBSN         | exonic       | stopgain             |              | 289     | HCM            | UNCERTAIN SIGNIFICANCE | VUS but keep in list. This is two SNPs next to each other. Each individually is common ~0.001 in Ashkenazi Jewish backgrounds, but individually they change a hydrophobic amino acid to another hydrophobic amino acid (Phe to Tyr or Leu). Our two together cause a change to a stop codon (orig: TTC, each snp individually TAC or TTA, our is TAA). However, if these variants are in linkage disequilibrium, then it's possible they could be too common to be causative? PMID: 34601892 On truncating OBSN mutations in HCM from 2021. Truncating OBSN mutations in general enriched in HCM population and HCM patients with OBSN truncating variants had higher chance of death than HCM patients without. All the variants in the study were of aa1150-8866 while ours is aa129. This is much more upstream. It could be an issue of nonsense mediated decay and not enough protein, but also an issue of dominant negative. The paper suggests the truncated protein may lack the motifs to interact with signaling molecules or other members of the sarcomere. We checked the RNA and OBSN is reduced in HCM vs Control, and even more reduced in 289. Additionally, this variant reported (PMID: 34957489) in a rhabdomyolysis patient (skeletal muscle disease). Patient had a second mutation in the other allele (all 6 patients in this paper had biallelic OBSN mutations) that was a splicing variant. Like the other patients in this study, they did not have cardiomyopathy. However, they are all young. Patient is only 19 (age 12 at first onset), so cardiomyopathy may come later? | clin, wgs | Clin_NotInPanel, WGS_merge                 |
| chr11_21805252_21805254_TAA_ATTT         | ABCC9        | exonic       | frameshift stopgain  |              | 298     | HCM            | UNCERTAIN SIGNIFICANCE | VUS but keep in list. This same mutation is in the literature (PMID: 15034580) in a DCM patient. Expression of the mutated gene in frog oocytes shows 70% reduction in channel trafficking. Mutation is in exon38, the c terminus. ATP-induced channel inhibition was blunted. "Thus, in contrast to the catalytic reaction in the wild type, where the rate-limiting step is ADP dissociation (K <sub>d</sub> ), the F5152A/ATase is characterized by rate-limiting Pi dissociation". No segregation analysis. This same paper found a second DCM patient with a different mutation (missense) in exon38 (near the catalytic ATPase pocket) that also affected the channel function. (Since this is just one functional study, not enough for P53). This variant also reported in PMID: 31638414. This was a study of very early onset atrial fibrillation. It was done at Stanford, but the patient in question was a white male. Our patient is a white female, so it is not the same patient. It is possible they are family though. The patient from the paper also has a variant in ALMS1 listed as VUS/likely benign. PMID: 24439875. Reports on a male with brugada syndrome (diagnosed at age 39) with this mutation. This paper finds 11 probands for Brugada/early repolarization with a total of 8 ABCC9 mutations. Didn't examine our mutation further, but for the others they did functional studies showing that 3 of the variants like the DCM paper blunted the ATP channel inhibition and were gain of function. These other mutations were missense SNPs.                               | clin, wgs | Clin_NotInPanel, WGS_merge                 |
| chr11_47344824_47344824_C_T              | MYBPC3       | exonic       | nonsynonymous SNV    | r397516074   | 319     | HCM            | PATHOGENIC             | This variant found in 7 patients in our cohort: 3 unrelated HCM patients (319, 431, 582) + 2 related HCM patients (711, 712) + 2 unrelated DCM patients (811, 814). Note that we have an additional HCM patient (693) where the dad carried this variant but our patient did not (hence they were sick for a different reason). This does not mean this variant wasn't pathogenic in the dad, as 693 could have gotten their pathogenic mutation from their mom.                                                                                                                                                                                                                                                                                                                                                                                                                                                                                                                                                                                                                                                                                                                                                                                                                                                                                                                                                                                                                                                                                                                                            | wgs       | WGS_P                                      |
| chr6_129460287_129460287_C_T             | LAMA2        | exonic       | stopgain             | rs398123383  | 320     | DCM            | LIKELEY PATHOGENIC     | Gene not in CardioClassifier                                                                                                                                                                                                                                                                                                                                                                                                                                                                                                                                                                                                                                                                                                                                                                                                                                                                                                                                                                                                                                                                                                                                                                                                                                                                                                                                                                                                                                                                                                                                                                                | clin, wgs | Clin_NotInPanel, WGS_P                     |
| chr14_23425814_23425814_G_A              | MYH7         | exonic       | nonsynonymous SNV    | rs121913630  | 333     | HCM            | PATHOGENIC             |                                                                                                                                                                                                                                                                                                                                                                                                                                                                                                                                                                                                                                                                                                                                                                                                                                                                                                                                                                                                                                                                                                                                                                                                                                                                                                                                                                                                                                                                                                                                                                                                             | clin, wgs | Clin_P, WGS_P                              |
| chr15_63042893_63042893_G_A              | TPM1         | exonic       | nonsynonymous SNV    | rs397516382  | 334     | HCM            | UNCERTAIN SIGNIFICANCE | VUS but keep in list. Multiple ClinVar entries and references to presence in cohorts in the literature.                                                                                                                                                                                                                                                                                                                                                                                                                                                                                                                                                                                                                                                                                                                                                                                                                                                                                                                                                                                                                                                                                                                                                                                                                                                                                                                                                                                                                                                                                                     | clin, wgs | Clin_P, WGS_P                              |
| chr10_99727098_99727098_G_C              | COX15        | exonic       | stopgain             | rs149718203  | 356     | HCM            | UNCERTAIN SIGNIFICANCE | VUS but keep in list. ClinVar has 3 Pathogenic entries for Leigh Syndrome. The original reporting of the Leigh syndrome patient did not have cardiomyopathy, though Leigh Syndrome can co-occur with cardiomyopathy. Literature does show the variant affects mitochondrial output, etc. However, Leigh Syndrome is very rare and incidence in some of the studies on gnomAD show a higher frequency                                                                                                                                                                                                                                                                                                                                                                                                                                                                                                                                                                                                                                                                                                                                                                                                                                                                                                                                                                                                                                                                                                                                                                                                        | clin, wgs | Clin_NotInPanel, WGS_Trunc                 |
| chr2_178578066_178578066_G_A             | TTN          | exonic       | stopgain             | rs371678190  | 367     | DCM            | LIKELEY PATHOGENIC     |                                                                                                                                                                                                                                                                                                                                                                                                                                                                                                                                                                                                                                                                                                                                                                                                                                                                                                                                                                                                                                                                                                                                                                                                                                                                                                                                                                                                                                                                                                                                                                                                             | wgs       | WGS_P                                      |
| chr11_47348541_47348541_C_G              | MYBPC3       | exonic       | nonsynonymous SNV    | rs397516068  | 371     | HCM            | LIKELEY PATHOGENIC     |                                                                                                                                                                                                                                                                                                                                                                                                                                                                                                                                                                                                                                                                                                                                                                                                                                                                                                                                                                                                                                                                                                                                                                                                                                                                                                                                                                                                                                                                                                                                                                                                             | clin, wgs | Clin_P, WGS_P                              |
| chr11_47333306_47333306_G                | MYBPC3       | exonic       | frameshift insertion | rs730880669  | 373     | HCM            | LIKELEY PATHOGENIC     |                                                                                                                                                                                                                                                                                                                                                                                                                                                                                                                                                                                                                                                                                                                                                                                                                                                                                                                                                                                                                                                                                                                                                                                                                                                                                                                                                                                                                                                                                                                                                                                                             | clin, wgs | Clin_P, WGS_P                              |
| chr2_178633009_178633009_A_              | TTN          | exonic       | stopgain             | .            | 399     | DCM            | LIKELEY PATHOGENIC     |                                                                                                                                                                                                                                                                                                                                                                                                                                                                                                                                                                                                                                                                                                                                                                                                                                                                                                                                                                                                                                                                                                                                                                                                                                                                                                                                                                                                                                                                                                                                                                                                             | wgs       | WGS_Freq                                   |
| chr11_47346212_47346212_T                | MYBPC3       | exonic       | frameshift insertion | rs730880723  | 419     | HCM            | LIKELEY PATHOGENIC     |                                                                                                                                                                                                                                                                                                                                                                                                                                                                                                                                                                                                                                                                                                                                                                                                                                                                                                                                                                                                                                                                                                                                                                                                                                                                                                                                                                                                                                                                                                                                                                                                             | clin, wgs | Clin_P, WGS_P                              |
| chr6_118558947_118558947_G_A             | PLN          | exonic       | nonsynonymous SNV    | rs754782171  | 419     | HCM            | UNCERTAIN SIGNIFICANCE | VUS but keep in list. Also reported in the literature.                                                                                                                                                                                                                                                                                                                                                                                                                                                                                                                                                                                                                                                                                                                                                                                                                                                                                                                                                                                                                                                                                                                                                                                                                                                                                                                                                                                                                                                                                                                                                      | clin, wgs | Clin_NotInPanel, WGS_Freq                  |
| chr14_23425768_23425768_C_G              | MYH7         | exonic       | nonsynonymous SNV    | rs730880894  | 420     | HCM            | UNCERTAIN SIGNIFICANCE | VUS but keep in list. Reported in literature in other HCM patients. Found in 1 HCM patient (PMID:2724718). Our mutation is p. Ser738Thr, p.Ser738Arg was found in 1 HCM patient and her HCM son (PMID: 31416728) and not in her two children lacking HCM. Note that Ser and Thr are both polar while Arg (from the paper) is positive so it's a bigger change. p.Ser738Cys is also in ClinVar. The Arg and Cys versions are also rare. We find this variant in our patient 697 as well.                                                                                                                                                                                                                                                                                                                                                                                                                                                                                                                                                                                                                                                                                                                                                                                                                                                                                                                                                                                                                                                                                                                     | wgs       | WGS_P                                      |
| chr14_23425980_23425980_C_T              | MYH7         | exonic       | nonsynonymous SNV    | rs121913638  | 421     | HCM            | PATHOGENIC             |                                                                                                                                                                                                                                                                                                                                                                                                                                                                                                                                                                                                                                                                                                                                                                                                                                                                                                                                                                                                                                                                                                                                                                                                                                                                                                                                                                                                                                                                                                                                                                                                             | clin, wgs | Clin_P, WGS_P                              |
| chr2_178553559_178553560_CA_             | TTN          | exonic       | frameshift deletion  | .            | 428     | DCM            | LIKELEY PATHOGENIC     |                                                                                                                                                                                                                                                                                                                                                                                                                                                                                                                                                                                                                                                                                                                                                                                                                                                                                                                                                                                                                                                                                                                                                                                                                                                                                                                                                                                                                                                                                                                                                                                                             | wgs       | WGS_Freq                                   |
| chr11_47348424_47348424_C_T              | MYBPC3       | exonic       | nonsynonymous SNV    | rs397516074  | 431     | HCM            | PATHOGENIC             | This variant found in 7 patients in our cohort: 3 unrelated HCM patients (319, 431, 582) + 2 related HCM patients (711, 712) + 2 unrelated DCM patients (811, 814). Note that we have an additional HCM patient (693) where the dad carried this variant but our patient did not (hence they were sick for a different reason). This does not mean this variant wasn't pathogenic in the dad, as 693 could have gotten their pathogenic mutation from their mom.                                                                                                                                                                                                                                                                                                                                                                                                                                                                                                                                                                                                                                                                                                                                                                                                                                                                                                                                                                                                                                                                                                                                            | clin, wgs | Clin_P, WGS_P                              |
| chr2_178632166_178632167_TT_             | TTN          | exonic       | frameshift deletion  | rs794729316  | 437     | DCM            | LIKELEY PATHOGENIC     |                                                                                                                                                                                                                                                                                                                                                                                                                                                                                                                                                                                                                                                                                                                                                                                                                                                                                                                                                                                                                                                                                                                                                                                                                                                                                                                                                                                                                                                                                                                                                                                                             | clin, wgs | clin_research, Clin_VUS, WGS_VUS, WGS_Freq |
| chr11_47346379_47346379_C_T              | MYBPC3       | intronic     | .                    | rs397516083  | 438     | HCM            | LIKELEY PATHOGENIC     |                                                                                                                                                                                                                                                                                                                                                                                                                                                                                                                                                                                                                                                                                                                                                                                                                                                                                                                                                                                                                                                                                                                                                                                                                                                                                                                                                                                                                                                                                                                                                                                                             | clin, wgs | Clin_NotInPanel, WGS_P                     |
| chr14_23424839_23424839_C_T              | MYH7         | exonic       | nonsynonymous SNV    | rs36211715   | 440     | HCM            | PATHOGENIC             |                                                                                                                                                                                                                                                                                                                                                                                                                                                                                                                                                                                                                                                                                                                                                                                                                                                                                                                                                                                                                                                                                                                                                                                                                                                                                                                                                                                                                                                                                                                                                                                                             | wgs       | WGS_P                                      |
| chr10_110812295_110812295_C_T            | RBM20        | exonic       | nonsynonymous SNV    | rs747880281  | 495     | DCM            | LIKELEY PATHOGENIC     | CardioClassifier said VUS and only had PM2, PP2. I added P53 due to (PMID: 32905764)                                                                                                                                                                                                                                                                                                                                                                                                                                                                                                                                                                                                                                                                                                                                                                                                                                                                                                                                                                                                                                                                                                                                                                                                                                                                                                                                                                                                                                                                                                                        | wgs       | WGS_Freq                                   |
| chr6_7580339_7580342_GAAG_               | DSP          | exonic       | frameshift deletion  | .            | 496     | HCM            | LIKELEY PATHOGENIC     |                                                                                                                                                                                                                                                                                                                                                                                                                                                                                                                                                                                                                                                                                                                                                                                                                                                                                                                                                                                                                                                                                                                                                                                                                                                                                                                                                                                                                                                                                                                                                                                                             | clin, wgs | Clin_NotInPanel, WGS_Trunc                 |
| chr11_47335120_47335120_G_A              | MYBPC3       | exonic       | stopgain             | rs387907267  | 502     | HCM            | PATHOGENIC             |                                                                                                                                                                                                                                                                                                                                                                                                                                                                                                                                                                                                                                                                                                                                                                                                                                                                                                                                                                                                                                                                                                                                                                                                                                                                                                                                                                                                                                                                                                                                                                                                             | clin, wgs | Clin_P, WGS_P                              |
| chr10_110812298_110812298_G_A            | RBM20        | exonic       | nonsynonymous SNV    | rs267607001  | 503     | DCM            | LIKELEY PATHOGENIC     |                                                                                                                                                                                                                                                                                                                                                                                                                                                                                                                                                                                                                                                                                                                                                                                                                                                                                                                                                                                                                                                                                                                                                                                                                                                                                                                                                                                                                                                                                                                                                                                                             | clin, wgs | Clin_P, WGS_P                              |
| chr14_23426810_23426810_G_A              | MYH7         | exonic       | nonsynonymous SNV    | rs727503263  | 512     | HCM            | LIKELEY PATHOGENIC     | CardioClassifier was PM2, PP3, PM1=VUS. ClinVar was also P54 = likely pathogenic. ClinVar P54 cites multiple publications of patients with this mutation.                                                                                                                                                                                                                                                                                                                                                                                                                                                                                                                                                                                                                                                                                                                                                                                                                                                                                                                                                                                                                                                                                                                                                                                                                                                                                                                                                                                                                                                   | clin, wgs | Clin_P, WGS_P                              |
| chr11_47332094_47332104_ACACGTGC CT_CAGG | MYBPC3       |              |                      | rs108507897  | 517     | HCM            | LIKELEY PATHOGENIC     | No functional data. Likely does not cause NMD (nonsense mediated decay) but alters final amino acid sequence. Two other pathogenic/likely pathogenic ClinVar entries downstream that are frameshift or termination, however only one has good annotation. Because of the R1271X downstream variant good annotation keep this as likely pathogenic.                                                                                                                                                                                                                                                                                                                                                                                                                                                                                                                                                                                                                                                                                                                                                                                                                                                                                                                                                                                                                                                                                                                                                                                                                                                          | clin, wgs | Clin_P, WGS_merge, WGS_Freq                |
| chr14_23431468_23431468_C_T              | MYH7         | exonic       | nonsynonymous SNV    | rs3218713    | 534     | HCM            | PATHOGENIC             |                                                                                                                                                                                                                                                                                                                                                                                                                                                                                                                                                                                                                                                                                                                                                                                                                                                                                                                                                                                                                                                                                                                                                                                                                                                                                                                                                                                                                                                                                                                                                                                                             | clin, wgs | Clin_P, WGS_P                              |
| chr2_178620017_178620017_T               | TTN          | exonic       | frameshift insertion | rs1060500443 | 541     | DCM            | LIKELEY PATHOGENIC     |                                                                                                                                                                                                                                                                                                                                                                                                                                                                                                                                                                                                                                                                                                                                                                                                                                                                                                                                                                                                                                                                                                                                                                                                                                                                                                                                                                                                                                                                                                                                                                                                             | wgs       | WGS_Freq                                   |



|                               |        |            |                        |              |     |                                |                                    |                                                                                                                                                                                                                                                                                                                                                                                                                                                                                                                                                                                                                                                                                                                                                                                                                                                                                            |           |                            |
|-------------------------------|--------|------------|------------------------|--------------|-----|--------------------------------|------------------------------------|--------------------------------------------------------------------------------------------------------------------------------------------------------------------------------------------------------------------------------------------------------------------------------------------------------------------------------------------------------------------------------------------------------------------------------------------------------------------------------------------------------------------------------------------------------------------------------------------------------------------------------------------------------------------------------------------------------------------------------------------------------------------------------------------------------------------------------------------------------------------------------------------|-----------|----------------------------|
| chr14_23417152_23417152_C_G   | MYH7   |            |                        | rs876661374  | 543 | HCM                            | UNCERTAIN SIGNIFICANCE             | VUS but keep in list. ClinVar entry by Invitae maps out that: "Variants that disrupt the donor or acceptor splice site typically lead to a loss of protein function (PMID: 16199547), however the current clinical and genetic evidence is not sufficient to establish whether loss-of-function variants in MYH7 cause disease. Disruption of this splice site has been observed in individual(s) with autosomal dominant distal myopathy and/or hypertrophic cardiomyopathy (PMID: 30297972, 32403337)." We do not have cardiomyocyte RNA-seq data for this sample.                                                                                                                                                                                                                                                                                                                       | clin, wgs | clin_research, WGS_vqsr    |
| chr11_47342698_47342698_G_A   | MYBPC3 | exonic     | nonsynonymous SNV      | rs375882485  | 544 | HCM                            | PATHOGENIC                         |                                                                                                                                                                                                                                                                                                                                                                                                                                                                                                                                                                                                                                                                                                                                                                                                                                                                                            | clin, wgs | Clin_P, WGS_P              |
| chr11_47333226_47333226_C_C   | MYBPC3 | exonic     | frameshift insertion   | rs397516014  | 546 | HCM                            | LIKELEY PATHOGENIC                 |                                                                                                                                                                                                                                                                                                                                                                                                                                                                                                                                                                                                                                                                                                                                                                                                                                                                                            | clin, wgs | Clin_P, WGS_P              |
| chr1_77933402_77933402_C_T    | NEXN   | exonic     | stopgain               | rs750076188  | 546 | HCM                            | UNCERTAIN SIGNIFICANCE             | VUS but keep in list.                                                                                                                                                                                                                                                                                                                                                                                                                                                                                                                                                                                                                                                                                                                                                                                                                                                                      | clin, wgs | Clin_NotInPanel, WGS_Trunc |
| chr14_23424107_23424107_G_C   | MYH7   | exonic     | nonsynonymous SNV      | rs121913631  | 548 | HCM                            | PATHOGENIC                         |                                                                                                                                                                                                                                                                                                                                                                                                                                                                                                                                                                                                                                                                                                                                                                                                                                                                                            | wgs       | WGS_P                      |
| chr11_47333192_47333192_A_C   | MYBPC3 | splicing   | .                      | rs387906397  | 550 | HCM                            | PATHOGENIC                         | Mutation also in patient 591 and 612 (also with HCM)                                                                                                                                                                                                                                                                                                                                                                                                                                                                                                                                                                                                                                                                                                                                                                                                                                       | clin, wgs | Clin_P, WGS_P              |
| chrX_101398942_101398942_T_C  | GLA    | exonic     | nonsynonymous SNV      | rs28935197   | 552 | Other (Fabry is HCM lookalike) | LIKELEY PATHOGENIC                 |                                                                                                                                                                                                                                                                                                                                                                                                                                                                                                                                                                                                                                                                                                                                                                                                                                                                                            | clin, wgs | Clin_P, WGS_P              |
| chr11_47351255_47351256_G_A   | MYBPC3 | exonic     | frameshift deletion    | rs1057517766 | 562 | HCM                            | LIKELEY PATHOGENIC                 |                                                                                                                                                                                                                                                                                                                                                                                                                                                                                                                                                                                                                                                                                                                                                                                                                                                                                            | clin, wgs | Clin_P, WGS_P              |
| chr14_23429278_23429278_C_T   | MYH7   | exonic     | nonsynonymous SNV      | rs121913624  | 564 | HCM                            | PATHOGENIC                         |                                                                                                                                                                                                                                                                                                                                                                                                                                                                                                                                                                                                                                                                                                                                                                                                                                                                                            | clin, wgs | Clin_P, WGS_P              |
| chr14_23425316_23425316_C_T   | MYH7   | exonic     | nonsynonymous SNV      | rs3218716    | 565 | HCM                            | PATHOGENIC                         |                                                                                                                                                                                                                                                                                                                                                                                                                                                                                                                                                                                                                                                                                                                                                                                                                                                                                            | clin, wgs | Clin_P, WGS_P              |
| chr11_228340511_228340511_C_G | OBSCN  | rs76488972 | exonic                 | stopgain     | 565 | HCM                            | UNCERTAIN SIGNIFICANCE             | VUS: not in ClinVar, not enough data, high freq in 100genomes substudy, but only 694 patients so not sure; no LOF P/LP mutations in this gene in ClinVar to help annotate. But there is literature on truncating OBSCN mutations in HCM (PMID: 34603920). Also this patient has a pathogenic mutation in MYH7. (This plus high frequency suggests at most it would be modifying). Keep in because of other OBSCN stopgain variant in our cohort to compare to.                                                                                                                                                                                                                                                                                                                                                                                                                             | clin, wgs | Clin_NotInPanel, WGS_Trunc |
| chr18_15151790_15151790_G_A   | MYO11  | exonic     | stopgain               | rs765191680  | 568 | HCM                            | UNCERTAIN SIGNIFICANCE             | VUS but keep in list. No pathogenic / likely pathogenic mutations in MYO11 in ClinVar. Very few in literature. This truncation occurs only 35% of the way into the protein. We do not have RNA-seq data for this line to check expression. There is not enough data to link loss of function MYO11 to HCM. Additionally, PMID: 33452765 shows knock out in hES-derived cardiomyocytes have an atrophy phenotype, not an HCM phenotype.                                                                                                                                                                                                                                                                                                                                                                                                                                                     | clin, wgs | clin_research, WGS_VUS     |
| chr14_23424855_23424855_T_C   | MYH7   | exonic     | nonsynonymous SNV      | rs730880749  | 569 | HCM                            | LIKELEY PATHOGENIC                 | CardioClassifier was PM2, PP3, PM1=VUS; ClinVar was PM2, PM1, PS4 = likely pathogenic. ClinVar was not PP3, however by my evaluation, including CADD score, it is bad. ClinVar PS4 cites PMID: 27247418. This is the Stanford structure paper. I do not count this alone, as it didn't solve causality, but they also site communication with GeneDx and Invitae to increase HCM count. They also site PP1 for segregation in 2 families but site private communication with GeneDx and Invitae. This submission by ClinGen Cardiomyopathy Variant Curation Expert Panel an FDA recognized database. This variant found in this patient's sister, patient 570, also in our study.                                                                                                                                                                                                          | clin, wgs | Clin_VUS, WGS_P            |
| chr14_23424855_23424855_T_C   | MYH7   | exonic     | nonsynonymous SNV      | rs730880749  | 570 | HCM                            | LIKELEY PATHOGENIC                 | CardioClassifier was PM2, PP3, PM1=VUS; ClinVar was PM2, PM1, PS4 = likely pathogenic. ClinVar was not PP3, however by my evaluation, including CADD score, it is bad. ClinVar PS4 cites PMID: 27247418. This is the Stanford structure paper. I do not count this alone, as it didn't solve causality, but they also site communication with GeneDx and Invitae to increase HCM count. They also site PP1 for segregation in 2 families but site private communication with GeneDx and Invitae. This submission by ClinGen Cardiomyopathy Variant Curation Expert Panel an FDA recognized database. This variant found in this patient's sister, patient 559, also in our study.                                                                                                                                                                                                          | clin, wgs | Clin_VUS, WGS_P            |
| chr11_47338680_47338680_C_T   | MYBPC3 | splicing   | .                      | rs727504334  | 571 | HCM                            | LIKELEY PATHOGENIC                 |                                                                                                                                                                                                                                                                                                                                                                                                                                                                                                                                                                                                                                                                                                                                                                                                                                                                                            | clin, wgs | Clin_P, WGS_P              |
| chr10_119672446_119672446_C_A | BAG3   | exonic     | stopgain               | rs876661342  | 574 | DCM                            | LIKELEY PATHOGENIC                 |                                                                                                                                                                                                                                                                                                                                                                                                                                                                                                                                                                                                                                                                                                                                                                                                                                                                                            | clin, wgs | Clin_P, WGS_P              |
| chr14_23424876_23424876_G_A   | MYH7   | exonic     | nonsynonymous SNV      | rs2754158    | 581 | HCM                            | UNCERTAIN SIGNIFICANCE             | VUS but keep in list. No ClinVar entry.                                                                                                                                                                                                                                                                                                                                                                                                                                                                                                                                                                                                                                                                                                                                                                                                                                                    | clin, wgs | Clin_Absent, WGS_P         |
| chr11_47348424_47348424_C_T   | MYBPC3 | exonic     | nonsynonymous SNV      | rs397516074  | 582 | HCM                            | PATHOGENIC                         | This variant found in 7 patients in our cohort: 3 unrelated HCM patients (319, 431, 582) + 2 related HCM patients (711, 712) + 2 unrelated DCM patients (811, 814). Note that we have an additional HCM patient (593) where the dad carried this variant but our patient did not (hence they were sick for a different reason). This does not mean this variant wasn't pathogenic in the dad, as 693 could have gotten their pathogenic mutation from their mom.                                                                                                                                                                                                                                                                                                                                                                                                                           | clin, wgs | Clin_P, WGS_P              |
| chr11_47333192_47333192_A_C   | MYBPC3 | splicing   | .                      | rs387906397  | 591 | HCM                            | PATHOGENIC                         | Mutation also in patient 550 and 612 (also with HCM)                                                                                                                                                                                                                                                                                                                                                                                                                                                                                                                                                                                                                                                                                                                                                                                                                                       | clin, wgs | Clin_P, WGS_P              |
| chr14_23426809_23426809_C_T   | MYH7   | exonic     | nonsynonymous SNV      | rs730880883  | 592 | HCM                            | UNCERTAIN SIGNIFICANCE             | VUS but keep in list. Also reported in the literature.                                                                                                                                                                                                                                                                                                                                                                                                                                                                                                                                                                                                                                                                                                                                                                                                                                     | wgs       | WGS_Freq                   |
| chr11_47342621_47342621_AG7G  | MYBPC3 | exonic     | frameshift insertion   | rs730880712  | 593 | HCM                            | LIKELEY PATHOGENIC                 |                                                                                                                                                                                                                                                                                                                                                                                                                                                                                                                                                                                                                                                                                                                                                                                                                                                                                            | clin, wgs | Clin_P, WGS_VUS, WGS_Freq  |
| chr2_178537711_178537711_C_A  | TTN    | exonic     | stopgain               | rs886038825  | 596 | DCM                            | LIKELEY PATHOGENIC                 | This mutation also found in another DCM patient, #754.                                                                                                                                                                                                                                                                                                                                                                                                                                                                                                                                                                                                                                                                                                                                                                                                                                     | clin, wgs | Clin_P, WGS_P              |
| chr11_47346331_47346331_C_T   | MYBPC3 | exonic     | stopgain               | rs727503211  | 598 | HCM                            | LIKELEY PATHOGENIC                 |                                                                                                                                                                                                                                                                                                                                                                                                                                                                                                                                                                                                                                                                                                                                                                                                                                                                                            | clin, wgs | Clin_P, WGS_P              |
| chr1_201363390_201363390_C_T  | TNNT2  | exonic     | nonsynonymous SNV      | rs45501500   | 601 | DCM                            | UNCERTAIN SIGNIFICANCE             | VUS but keep in list. Multiple ClinVar entries and some functional data that may not be clinically relevant - occurs in several cohort studies                                                                                                                                                                                                                                                                                                                                                                                                                                                                                                                                                                                                                                                                                                                                             | clin, wgs | Clin_VUS, WGS_P            |
| chr14_23426833_23426833_C_T   | MYH7   | exonic     | nonsynonymous SNV      | rs371898076  | 603 | HCM                            | PATHOGENIC                         |                                                                                                                                                                                                                                                                                                                                                                                                                                                                                                                                                                                                                                                                                                                                                                                                                                                                                            | clin, wgs | Clin_P, WGS_P              |
| pkp2dup                       | PKP2   |            |                        |              | 605 | DCM                            | UNCERTAIN SIGNIFICANCE             | VUS but keep in list. PKP2 deletion has been found to segregate in ARVC family (PMID: 23486541) and has been found in other unrelated probands as well as patients with partial deletions (PMID: 29038103). We haven't found literature for a duplication. The deletion could affect the phenotype even if not causative.                                                                                                                                                                                                                                                                                                                                                                                                                                                                                                                                                                  | clin, wgs | clin_research, WGS_class   |
| chr14_23424907_23424909_CTT_  | MYH7   | exonic     | nonframeshift deletion | rs397516155  | 607 | HCM                            | LIKELEY PATHOGENIC                 |                                                                                                                                                                                                                                                                                                                                                                                                                                                                                                                                                                                                                                                                                                                                                                                                                                                                                            | clin, wgs | Clin_P, WGS_P              |
| chr11_47333192_47333192_A_C   | MYBPC3 | splicing   | .                      | rs387906397  | 612 | HCM                            | PATHOGENIC                         | Mutation also in patient 591 and 550 (also with HCM)                                                                                                                                                                                                                                                                                                                                                                                                                                                                                                                                                                                                                                                                                                                                                                                                                                       | clin, wgs | Clin_P, WGS_P              |
| chr2_151494190_151494191_CT_  | NEB    | exonic     | frameshift deletion    | rs755863625  | 612 | HCM                            | UNCERTAIN SIGNIFICANCE (rasopathy) | VUS but keep in list. VUS for Rasopathy. NemaLine myopathy more often inherited as recessive, but can be dominant. Usually not associated with cardiomyopathy but examples of both HCM and DCM. Multiple pathogenic ClinVar entries for NemaLine myopathy for this variant. Downstream truncating variants also cause the disease.                                                                                                                                                                                                                                                                                                                                                                                                                                                                                                                                                         | clin, wgs | Clin_NotInPanel, WGS_Trunc |
| chr11_47343281_47343281_C_T   | MYBPC3 | intronic   | .                      | rs587776699  | 613 | HCM                            | LIKELEY PATHOGENIC                 | Variant not in CardioClassifier. This is based on ClinVar. Somewhat dependent on the assays from only one study.                                                                                                                                                                                                                                                                                                                                                                                                                                                                                                                                                                                                                                                                                                                                                                           | wgs       | WGS_P                      |
| chr15_84857913_84857913_C_T   | ALPK3  | exonic     | stopgain               | rs749465164  | 613 | HCM                            | PATHOGENIC                         |                                                                                                                                                                                                                                                                                                                                                                                                                                                                                                                                                                                                                                                                                                                                                                                                                                                                                            | clin, wgs | Clin_NotInPanel, WGS_Trunc |
| chr2_178570469_178570469_T_   | TTN    | exonic     | frameshift deletion    | rs113691542  | 624 | DCM                            | LIKELEY PATHOGENIC                 |                                                                                                                                                                                                                                                                                                                                                                                                                                                                                                                                                                                                                                                                                                                                                                                                                                                                                            | clin, wgs | Clin_P, WGS_P              |
| chr19_4117563_4117563_C_      | MAP2K2 | exonic     | frameshift deletion    | rs777549760  | 634 | HCM                            | UNCERTAIN SIGNIFICANCE             | VUS but keep in list as potential modifier. There are 3 ClinVar entries for cardiac/rasopathies. Not good population data or mechanistic data. Likely loss of function (LOF) but not clear link for LOF to disease. Sarcoplasmic mutations are more common for adult-onset HCM, while these rasopathy genes are more common in pediatric cases. In pediatric cases, map2k2 rasopathy associated with cardiofaciocardiac syndrome, associated with HCM in 15-40% of cases and pulmonary valve stenosis in 65-100% of cases. In these pediatric rasopathies the HCM is associated with more severe left ventricular outflow tract obstruction (like our patient has) (PMID: 33718303), however the EMR we were given doesn't indicate childhood onset, nor any other rasopathy symptoms. Thus, keep this mutation in the pool as a modifier, but not as a likely P/LP for the patient's HCM. | clin, wgs | Clin_NotInPanel, WGS_Trunc |
| chr11_47332569_47332569_G_    | MYBPC3 | exonic     | frameshift deletion    | rs397516029  | 638 | HCM                            | LIKELEY PATHOGENIC                 |                                                                                                                                                                                                                                                                                                                                                                                                                                                                                                                                                                                                                                                                                                                                                                                                                                                                                            | clin, wgs | Clin_P, WGS_P              |
| chr1_156136024_156136024_C_T  | LMNA   | exonic     | stopgain               | .            | 643 | DCM                            | LIKELEY PATHOGENIC                 |                                                                                                                                                                                                                                                                                                                                                                                                                                                                                                                                                                                                                                                                                                                                                                                                                                                                                            | wgs       | WGS_Freq                   |
| chr2_219568063_219568063_T    | OBSL1  | exonic     | frameshift insertion   | rs762334954  | 650 | DCM                            | PATHOGENIC (Three M syndrome 2)    | Pathogenic for Three M syndrome 2. Annotation dependent on ClinVar, as we don't study this disease. However, this is a recessive disorder and our patient is a heterozygote. From what we can tell, this syndrome has normal lifespan and cardiac dysfunction is not a major symptom. No OBSL1 variants in ClinVar for cardiomyopathy, so for DCM, we consider this a VUS.                                                                                                                                                                                                                                                                                                                                                                                                                                                                                                                 | clin, wgs | Clin_NotInPanel, WGS_Trunc |

|                                     |                |          |                        |                                                                         |     |                 |                                      |                                                                                                                                                                                                                                                                                                                                                                                                                                                                                                                                                                                                                                                                                                            |               |                            |
|-------------------------------------|----------------|----------|------------------------|-------------------------------------------------------------------------|-----|-----------------|--------------------------------------|------------------------------------------------------------------------------------------------------------------------------------------------------------------------------------------------------------------------------------------------------------------------------------------------------------------------------------------------------------------------------------------------------------------------------------------------------------------------------------------------------------------------------------------------------------------------------------------------------------------------------------------------------------------------------------------------------------|---------------|----------------------------|
| chr14_23424951_23424951_A_G         | MYH7           | exonic   | nonsynonymous SNV      | rs730880746                                                             | 662 | HCM             | UNCERTAIN SIGNIFICANCE               | VUS but keep in list. Also reported in the literature.                                                                                                                                                                                                                                                                                                                                                                                                                                                                                                                                                                                                                                                     | clin, wgs     | Clin_VUS, WGS_Freq         |
| chr14_23431641_23431641_C_T         | MYH7           | exonic   | nonsynonymous SNV      | rs1057517773                                                            | 676 | HCM             | UNCERTAIN SIGNIFICANCE               | VUS but keep in list. Reported in literature in other HCM patients - PMID: 27247418, 27532257. These papers also report the p.Ala226Val mutation at the same residue. These are statistics papers looking at mutations in large cohorts. They don't determine pathogenicity. Also found in 1 HCM patient in PMID: 27600940. Paper DOI: 10.3390/jms17081239 - Also found in a patient with early-onset HCM in conjunction with a likely benign missense mutation in GLA (rs28935400). And found in 1 HCM patient in PMID: 26565175. (This paper and the last one with the DOI are both Italian.) This group did a follow-up paper (PMID: 27054166) that found the mutation likely causes "steric hindrance" | clin, wgs     | Clin_P, WGS_P              |
| chr2_178598977_178598977_T          | TTN            | exonic   | frameshift insertion   | rs397516266                                                             | 677 | DCM             | LIKELEY PATHOGENIC                   |                                                                                                                                                                                                                                                                                                                                                                                                                                                                                                                                                                                                                                                                                                            | clin, wgs     | Clin_VUS, WGS_P            |
| chr1_201364341_201364341_C_T        | TNNT2          | exonic   | nonsynonymous SNV      | rs397516466                                                             | 684 | LVNC            | LIKELEY PATHOGENIC                   | Note patient from paper cited in ClinVar with functional data was 70 at age of onset vs the average age of TNNT2 patients in their 20s. CardioClassifier said VUS since didn't have the P53 functional note.                                                                                                                                                                                                                                                                                                                                                                                                                                                                                               | clin, wgs     | Clin_VUS, WGS_P            |
| chr14_23425768_23425768_C_G         | MYH7           | exonic   | nonsynonymous SNV      | rs730880894                                                             | 697 | HCM             | UNCERTAIN SIGNIFICANCE               | VUS but keep in list. Reported in literature in other HCM patients. Found in 1 HCM patient (PMID:27247418). Our mutation is p.Ser738Thr, p.Ser738Arg was found in 1 HCM patient and her HCM son (PMID: 31416728) and not in her two children lacking HCM. Note that Ser and Thr are both polar while Arg (from the paper) is positive so it's a bigger change. pSer738Cys is also in ClinVar. The Arg and Cys versions are also rare. We find this variant in our patient 420 as well.                                                                                                                                                                                                                     | clin, wgs     | Clin_VUS, WGS_P            |
| chr2_178740646_178740646_G_T        | TTN            | exonic   | stopgain               | rs730912401                                                             | 709 | DCM             | LIKELEY PATHOGENIC                   |                                                                                                                                                                                                                                                                                                                                                                                                                                                                                                                                                                                                                                                                                                            | wgs           | WGS_Freq                   |
| chr7_128837228_128837228_C_T        | FLNC           | exonic   | stopgain               | .                                                                       | 710 | DCM             | LIKELEY PATHOGENIC                   |                                                                                                                                                                                                                                                                                                                                                                                                                                                                                                                                                                                                                                                                                                            | clin, wgs     | Clin_NotInPanel, WGS_Trunc |
| chr11_47348424_47348424_C_T         | MYBPC3         | exonic   | nonsynonymous SNV      | rs397516074                                                             | 711 | HCM             | PATHOGENIC                           | This variant found in 7 patients in our cohort: 3 unrelated HCM patients (319, 431, 582) + 2 related HCM patients (711, 712) + 2 unrelated DCM patients (811, 814). Note that we have an additional HCM patient (693) where the dad carried this variant but our patient did not (hence they were sick for a different reason). This does not mean this variant wasn't pathogenic in the dad, as 693 could have gotten their pathogenic mutation from their mom.                                                                                                                                                                                                                                           | clin_fam, wgs | clin_fam, WGS_P            |
| chr11_47348424_47348424_C_T         | MYBPC3         | exonic   | nonsynonymous SNV      | rs397516074                                                             | 712 | HCM             | PATHOGENIC                           | This variant found in 7 patients in our cohort: 3 unrelated HCM patients (319, 431, 582) + 2 related HCM patients (711, 712) + 2 unrelated DCM patients (811, 814). Note that we have an additional HCM patient (693) where the dad carried this variant but our patient did not (hence they were sick for a different reason). This does not mean this variant wasn't pathogenic in the dad, as 693 could have gotten their pathogenic mutation from their mom.                                                                                                                                                                                                                                           | wgs           | WGS_P                      |
| chr2_178546612_178546612_G_A        | TTN            | exonic   | stopgain               | rs1060500435                                                            | 715 | DCM             | LIKELEY PATHOGENIC                   |                                                                                                                                                                                                                                                                                                                                                                                                                                                                                                                                                                                                                                                                                                            | clin, wgs     | Clin_P, WGS_P              |
| chr2_178569734_178569735_TA_        | TTN            | exonic   | frameshift deletion    | rs794729342                                                             | 721 | DCM             | LIKELEY PATHOGENIC                   |                                                                                                                                                                                                                                                                                                                                                                                                                                                                                                                                                                                                                                                                                                            | clin, wgs     | Clin_VUS, WGS_P            |
| chr14_23424148_23424148_T_C         | MYH7           | exonic   | nonsynonymous SNV      | rs397516161                                                             | 738 | HCM             | PATHOGENIC                           |                                                                                                                                                                                                                                                                                                                                                                                                                                                                                                                                                                                                                                                                                                            | clin, wgs     | Clin_P, WGS_P              |
| chr1_156136093_156136093_C_T        | LMNA           | exonic   | nonsynonymous SNV      | rs397517889                                                             | 741 | DCM             | LIKELEY PATHOGENIC                   | CardioClassifier said VUS since didn't have the P54 note. There are multiple pathogenic / likely pathogenic ClinVar entries and multiple published cohorts where this mutation, and another missense mutation at this amino acid, are documented                                                                                                                                                                                                                                                                                                                                                                                                                                                           | clin, wgs     | Clin_P, WGS_P              |
| chr2_178537711_178537711_C_A        | TTN            | exonic   | stopgain               | rs886038825                                                             | 754 | DCM             | LIKELEY PATHOGENIC                   | This mutation also found in another DCM patient, #596.                                                                                                                                                                                                                                                                                                                                                                                                                                                                                                                                                                                                                                                     | clin, wgs     | Clin_VUS, WGS_P            |
| chr15_48445467_48445467_G_T         | FBN1           | exonic   | stopgain               | rs363806                                                                | 766 | DCM             | LIKELEY PATHOGENIC (Marfan syndrome) | for Marfan syndrome                                                                                                                                                                                                                                                                                                                                                                                                                                                                                                                                                                                                                                                                                        | clin, wgs     | Clin_P, WGS_NotInPanel     |
| chrM_3243_3243_A_G                  | trNA Leu (UUR) |          |                        | rs199474657                                                             | 769 | DCM             | LIKELEY PATHOGENIC                   | Multiple ClinVar entries show this is pathogenic for MELAS. This patient has a family history of MELAS symptoms as well as some of her own MELAS symptoms. Heart failure most likely developed due to that.                                                                                                                                                                                                                                                                                                                                                                                                                                                                                                | clin, wgs     | Clin_P, WGS_NotInPanel     |
| chrX_136206492_136206492_G_         | FHL1           | exonic   | frameshift deletion    | rs1060502840                                                            | 772 | DCM             | LIKELEY PATHOGENIC                   |                                                                                                                                                                                                                                                                                                                                                                                                                                                                                                                                                                                                                                                                                                            | clin, wgs     | Clin_P, WGS_Vqsr           |
| chr2_178563474_178563474_C_         | TTN            | exonic   | frameshift deletion    | rs794729349                                                             | 780 | DCM             | LIKELEY PATHOGENIC                   |                                                                                                                                                                                                                                                                                                                                                                                                                                                                                                                                                                                                                                                                                                            | clin, wgs     | Clin_VUS, WGS_P            |
| chr2_178542803_178542803_T          | TTN            | exonic   | frameshift insertion   | rs794729365                                                             | 783 | DCM             | LIKELEY PATHOGENIC                   |                                                                                                                                                                                                                                                                                                                                                                                                                                                                                                                                                                                                                                                                                                            | wgs           | WGS_P                      |
| chr2_178607429_178607429_T_         | TTN            | exonic   | frameshift deletion    | .                                                                       | 788 | DCM             | LIKELEY PATHOGENIC                   |                                                                                                                                                                                                                                                                                                                                                                                                                                                                                                                                                                                                                                                                                                            | wgs           | WGS_Freq                   |
| chr11_47348424_47348424_C_T         | MYBPC3         | exonic   | nonsynonymous SNV      | rs397516074                                                             | 811 | DCM             | PATHOGENIC                           | This variant found in 7 patients in our cohort: 3 unrelated HCM patients (319, 431, 582) + 2 related HCM patients (711, 712) + 2 unrelated DCM patients (811, 814). Note that we have an additional HCM patient (693) where the dad carried this variant but our patient did not (hence they were sick for a different reason). This does not mean this variant wasn't pathogenic in the dad, as 693 could have gotten their pathogenic mutation from their mom.                                                                                                                                                                                                                                           | clin, wgs     | Clin_P, WGS_P              |
| chr11_47348424_47348424_C_T         | MYBPC3         | exonic   | nonsynonymous SNV      | rs397516074                                                             | 814 | DCM             | PATHOGENIC                           | This variant found in 7 patients in our cohort: 3 unrelated HCM patients (319, 431, 582) + 2 related HCM patients (711, 712) + 2 unrelated DCM patients (811, 814). Note that we have an additional HCM patient (693) where the dad carried this variant but our patient did not (hence they were sick for a different reason). This does not mean this variant wasn't pathogenic in the dad, as 693 could have gotten their pathogenic mutation from their mom.                                                                                                                                                                                                                                           | clin, wgs     | Clin_NotInPanel, WGS_P     |
| chr10_119651774_119651781_GACCGGCT_ | BAG3           | exonic   | frameshift deletion    | rs727505283                                                             | 815 | DCM             | LIKELEY PATHOGENIC                   |                                                                                                                                                                                                                                                                                                                                                                                                                                                                                                                                                                                                                                                                                                            | clin, wgs     | Clin_P, WGS_P              |
| chr1_99851059_99851060_AG_          | AGL            | exonic   | frameshift deletion    | rs113994127                                                             | 820 | Healthy Control | LIKELEY PATHOGENIC                   | Likely pathogenic for Glycogen Storage Disease II. This is based on ClinVar entries: low frequency in dbSNP, ClinVar shows: likely loss of function in a gene known to cause this disease, found in multiple cases - mostly homozygous or compound heterozygotes. Our patient is also heterozygous, so likely asymptomatic. Also in ClinVar in healthy screen.                                                                                                                                                                                                                                                                                                                                             | wgs           | WGS_healthyTrunc           |
| chr6_7582719_7582719_A              | DSP            | exonic   | frameshift insertion   | rs1554108609 (this rsID for same protein change, different cDNA change) | 852 | DCM             | LIKELEY PATHOGENIC                   |                                                                                                                                                                                                                                                                                                                                                                                                                                                                                                                                                                                                                                                                                                            | clin, wgs     | Clin_P, WGS_VUS, WGS_Freq  |
| chr3_38606682_38606682_C_T          | SCN5A          | exonic   | nonsynonymous SNV      | rs199473101                                                             | 869 | Healthy Control | LIKELEY PATHOGENIC                   |                                                                                                                                                                                                                                                                                                                                                                                                                                                                                                                                                                                                                                                                                                            | wgs           | WGS_P                      |
| chr6_118558957_118558959_AA_        | PLN            | exonic   | nonframeshift deletion | rs397516784                                                             | 875 | DCM             | PATHOGENIC                           | CardioClassifier said VUS and only had PM2, PM4.                                                                                                                                                                                                                                                                                                                                                                                                                                                                                                                                                                                                                                                           | clin, wgs     | Clin_P, WGS_P              |
| chr2_178546392_178546392_T_         | TTN            | exonic   | frameshift deletion    | .                                                                       | 888 | DCM             | LIKELEY PATHOGENIC                   |                                                                                                                                                                                                                                                                                                                                                                                                                                                                                                                                                                                                                                                                                                            | wgs           | WGS_Freq                   |
| chr2_178630240_178630240_C_T        | TTN            | splicing | .                      | rs771562210                                                             | 910 | DCM             | LIKELEY PATHOGENIC                   |                                                                                                                                                                                                                                                                                                                                                                                                                                                                                                                                                                                                                                                                                                            | clin, wgs     | Clin_VUS, WGS_P            |
| chr7_128841565_128841565_C_T        | FLNC           | exonic   | stopgain               | .                                                                       | 912 | DCM             | LIKELEY PATHOGENIC                   |                                                                                                                                                                                                                                                                                                                                                                                                                                                                                                                                                                                                                                                                                                            | clin, wgs     | Clin_NotInPanel, WGS_Trunc |
| chr1_156134811_156134811_C_T        | LMNA           | exonic   | nonsynonymous SNV      | rs794728591                                                             | 915 | DCM             | LIKELEY PATHOGENIC                   | CardioClassifier said VUS and only had PM2, PP3, PP2                                                                                                                                                                                                                                                                                                                                                                                                                                                                                                                                                                                                                                                       | clin, wgs     | Clin_conflict, WGS_P       |
| chr1_156136350_156136350_C_T        | LMNA           | exonic   | stopgain               | rs267607618                                                             | 920 | DCM             | LIKELEY PATHOGENIC                   |                                                                                                                                                                                                                                                                                                                                                                                                                                                                                                                                                                                                                                                                                                            | clin, wgs     | Clin_P, WGS_P              |
| chr6_7565521_7565521_G_A            | DSP            | splicing | .                      | rs727504443                                                             | 925 | DCM             | LIKELEY PATHOGENIC                   |                                                                                                                                                                                                                                                                                                                                                                                                                                                                                                                                                                                                                                                                                                            | clin, wgs     | Clin_P, WGS_P              |
| chr2_178570804_178570804_G_A        | TTN            | exonic   | stopgain               | rs794729382                                                             | 928 | DCM             | LIKELEY PATHOGENIC                   |                                                                                                                                                                                                                                                                                                                                                                                                                                                                                                                                                                                                                                                                                                            | clin, wgs     | Clin_P, WGS_P              |
| chr14_23400861_23400861_G_A         | MYH6           | exonic   | stopgain               | rs773659892                                                             | 928 | DCM             | UNCERTAIN SIGNIFICANCE               | VUS but keep in list. Invitae's ClinVar entry suggests it is likely loss of function in myh6, but not definitive proof for LOF of MYH6 to cause DCM (needed for PVS1), however there are true likely pathogenic loss of function mutations in this gene. Our RNA-seq analysis for control vs DCM shows MYH6 is not changed, nor is MYH6 reduced in patient 928.                                                                                                                                                                                                                                                                                                                                            | clin, wgs     | Clin_NotInPanel, WGS_Trunc |
| chr15_63062263_63062263_G_A         | TPM1           | exonic   | nonsynonymous SNV      | rs199476317                                                             | 938 | DCM             | LIKELEY PATHOGENIC                   | CardioClassifier said VUS and only had PM2, PP2                                                                                                                                                                                                                                                                                                                                                                                                                                                                                                                                                                                                                                                            | clin, wgs     | Clin_P, WGS_P              |
| chr2_178614138_178614138_T_         | TTN            | exonic   | frameshift deletion    | .                                                                       | 954 | DCM             | LIKELEY PATHOGENIC                   |                                                                                                                                                                                                                                                                                                                                                                                                                                                                                                                                                                                                                                                                                                            | wgs           | WGS_Freq                   |
| chr1_109296792_109296792_G_A        | MYBPHL         | exonic   | stopgain               | rs777845742                                                             | 954 | DCM             | UNCERTAIN SIGNIFICANCE               | VUS but keep in list. Not in ClinVar. Not enough data. No ClinVar pathogenic / likely pathogenic mutations for this gene, however RNA shows dramatically reduced expression compared to healthy, and even other DCM lines.                                                                                                                                                                                                                                                                                                                                                                                                                                                                                 | wgs           | WGS_Trunc                  |

|                                     |        |          |                         |                                                                                                                                                                                                                                                                                                                                                                                                                                                                                                                                                                                                                                       |           |                 |                                         |                                                                                                                                                                                                                                                                                                                                                                                                                                                                                                                                                                                                                                                                                                                                                                                                                                                                                                                                                            |               |                                      |
|-------------------------------------|--------|----------|-------------------------|---------------------------------------------------------------------------------------------------------------------------------------------------------------------------------------------------------------------------------------------------------------------------------------------------------------------------------------------------------------------------------------------------------------------------------------------------------------------------------------------------------------------------------------------------------------------------------------------------------------------------------------|-----------|-----------------|-----------------------------------------|------------------------------------------------------------------------------------------------------------------------------------------------------------------------------------------------------------------------------------------------------------------------------------------------------------------------------------------------------------------------------------------------------------------------------------------------------------------------------------------------------------------------------------------------------------------------------------------------------------------------------------------------------------------------------------------------------------------------------------------------------------------------------------------------------------------------------------------------------------------------------------------------------------------------------------------------------------|---------------|--------------------------------------|
| chr2_178585291_178585291_G_A        | TTN    | exonic   | stopgain                | rs768345594                                                                                                                                                                                                                                                                                                                                                                                                                                                                                                                                                                                                                           | 957       | DCM             | LIKELEY PATHOGENIC                      |                                                                                                                                                                                                                                                                                                                                                                                                                                                                                                                                                                                                                                                                                                                                                                                                                                                                                                                                                            | wgs           | WGS_P                                |
| chr7_150948442_150948442_A_C        | KCNH2  | splicing | .                       | .                                                                                                                                                                                                                                                                                                                                                                                                                                                                                                                                                                                                                                     | 959       | Other           | LIKELEY PATHOGENIC                      |                                                                                                                                                                                                                                                                                                                                                                                                                                                                                                                                                                                                                                                                                                                                                                                                                                                                                                                                                            | wgs           | WGS_healthyFreq                      |
| chr2_178587173_178587173_A_C        | TTN    | exonic   | stopgain                | .                                                                                                                                                                                                                                                                                                                                                                                                                                                                                                                                                                                                                                     | 963       | DCM             | LIKELEY PATHOGENIC                      |                                                                                                                                                                                                                                                                                                                                                                                                                                                                                                                                                                                                                                                                                                                                                                                                                                                                                                                                                            | wgs           | WGS_Freq                             |
| chr2_178547445_178547445_G_CTGCTAGA | TTN    | exonic   | frameshift insertion    | rs1219954334 is for g. 178547445. 178547445delinsCTGCTAG -> our is slightly different: Original DNA: 44-46-AGG. Original RNA: CCT=Leu. rsID DNA: 44-46: 44=A, 45=G, ins=CTGCTAG, 46=G. rsID RNA: 46=Leu part of previous codon, then the insertion starts the next codon: CTA = Leu. So there is a frameshift but, the original aa is Leu=Leu -> dbSNP says its Leu=Ser. Regardless, ours is also Leu=Ser. Our DNA: 44=A, ins=CTGCTAGA, 45=-. Our RNA=45:TCT=Ser. So our Mutation is same as rsID except the insertion of CTGCTAG is between 44 and 45 and the G at 46 is replaced with an A -> so ours is g. 178547445delinsCTGCTAGA | 965       | DCM             | LIKELEY PATHOGENIC                      |                                                                                                                                                                                                                                                                                                                                                                                                                                                                                                                                                                                                                                                                                                                                                                                                                                                                                                                                                            | clin, wgs     | Clin_P, WGS_merge, WGS_Freq          |
| chr6_129464371_129464371_C_A        | LAMA2  | exonic   | stopgain                | rs762806915                                                                                                                                                                                                                                                                                                                                                                                                                                                                                                                                                                                                                           | 986       | DCM             | LIKELEY PATHOGENIC (muscular dystrophy) | for muscular dystrophy                                                                                                                                                                                                                                                                                                                                                                                                                                                                                                                                                                                                                                                                                                                                                                                                                                                                                                                                     | clin, wgs     | Clin_P, WGS_P                        |
| chr6_129454186_129454186_G_T        | LAMA2  | exonic   | nonsynonymous SNV       | .                                                                                                                                                                                                                                                                                                                                                                                                                                                                                                                                                                                                                                     | 986       | DCM             | UNCERTAIN SIGNIFICANCE                  | VUS but keep in list. Only 2 variants in all of gnomAD with a pathogenic / likely pathogenic annotation that are not frameshift, stopgain, startloss, splicing. One is from 2001 and provides no supporting explanation. The other is from 2020 for muscular dystrophy, however it also creates a cryptic splice site. Thus not enough evidence for a missense mutation to cause disease, so VUS. However, the electronic medical record lists the mutation as likely pathogenic. We checked ClinVar for all LAMA2 missense pathogenic / likely pathogenic mutations (mostly muscular). There are 16. 7 lack annotation. For some their call of pathogenic / likely pathogenic don't meet ACMG guidelines. Other ClinVar entries probably do meet the guidelines, but these are all recessive disorders, and they say the variant occurs in trans in patients. Our patient also has a trans pathogenic / likely pathogenic mutation of LAMA2 from the mom. | clin, wgs     | clin_research, WGS_VUS               |
| chr11_47339792_47339792_T_C         | MYBPC3 | splicing | .                       | rs397515937                                                                                                                                                                                                                                                                                                                                                                                                                                                                                                                                                                                                                           | 995       | DCM             | PATHOGENIC                              |                                                                                                                                                                                                                                                                                                                                                                                                                                                                                                                                                                                                                                                                                                                                                                                                                                                                                                                                                            | clin, wgs     | Clin_P, WGS_P                        |
| chr10_110812295_110812295_C_T       | RBM20  | exonic   | nonsynonymous SNV       | rs747880281                                                                                                                                                                                                                                                                                                                                                                                                                                                                                                                                                                                                                           | 1074      | DCM             | LIKELEY PATHOGENIC                      | CardioClassifier said VUS and only had PM2, PP2. I added P53 due to (PMID: 32905764)                                                                                                                                                                                                                                                                                                                                                                                                                                                                                                                                                                                                                                                                                                                                                                                                                                                                       | wgs           | WGS_Freq                             |
| chr2_178564611_178564611_G_-        | TTN    | exonic   | frameshift deletion     | .                                                                                                                                                                                                                                                                                                                                                                                                                                                                                                                                                                                                                                     | 2012      | DCM             | LIKELEY PATHOGENIC                      |                                                                                                                                                                                                                                                                                                                                                                                                                                                                                                                                                                                                                                                                                                                                                                                                                                                                                                                                                            | clin, wgs     | Clin_P, WGS_VUS, WGS_Freq            |
| chr6_7565521_7565521_G_T            | DSP    | splicing | .                       | (rs727504443 is for G>A; no rsID for G>T)                                                                                                                                                                                                                                                                                                                                                                                                                                                                                                                                                                                             | 2015      | DCM             | LIKELEY PATHOGENIC                      |                                                                                                                                                                                                                                                                                                                                                                                                                                                                                                                                                                                                                                                                                                                                                                                                                                                                                                                                                            | clin, wgs     | Clin_P, WGS_VUS, WGS_Freq            |
| chr2_178587708_178587708_G_A        | TTN    | exonic   | stopgain                | rs764243269                                                                                                                                                                                                                                                                                                                                                                                                                                                                                                                                                                                                                           | 2025      | DCM             | LIKELEY PATHOGENIC                      |                                                                                                                                                                                                                                                                                                                                                                                                                                                                                                                                                                                                                                                                                                                                                                                                                                                                                                                                                            | clin, wgs     | Clin_P, WGS_P                        |
| chr6_112114662_112114662_C_T        | LAMA4  | splicing | .                       | rs368035482                                                                                                                                                                                                                                                                                                                                                                                                                                                                                                                                                                                                                           | 2025      | DCM             | UNCERTAIN SIGNIFICANCE                  | VUS but keep in list. If splice site affects expression, still not enough data to link LOF LAMA4 to DCM. We do not have cardiomyocyte RNA-seq data for this sample.                                                                                                                                                                                                                                                                                                                                                                                                                                                                                                                                                                                                                                                                                                                                                                                        | clin, wgs     | clin_research, WGS_VUS               |
| chr14_23386578_23386578_C_A         | MYH6   | exonic   | stopgain                | .                                                                                                                                                                                                                                                                                                                                                                                                                                                                                                                                                                                                                                     | 2035      | Other           | UNCERTAIN SIGNIFICANCE                  | VUS but keep in list. Variant is in gnomAD but not ClinVar or dbSNP. Low/absent frequency data in gnomAD. Only 1 termination pathogenic / likely pathogenic variant downstream of this one in ClinVar. The entry is sparse so no way to see if classification met ACMG guidelines.                                                                                                                                                                                                                                                                                                                                                                                                                                                                                                                                                                                                                                                                         | wgs           | WGS_healthyTrunc                     |
| chrX_120442650_120442650_G_A        | LAMP2  | exonic   | stopgain                | rs727503118                                                                                                                                                                                                                                                                                                                                                                                                                                                                                                                                                                                                                           | 2064      | LVNC            | LIKELEY PATHOGENIC                      |                                                                                                                                                                                                                                                                                                                                                                                                                                                                                                                                                                                                                                                                                                                                                                                                                                                                                                                                                            | wgs           | WGS_P                                |
| chr2_178569563_178569563_-CTT       | TTN    | exonic   | nonframeshift insertion | rs77268958                                                                                                                                                                                                                                                                                                                                                                                                                                                                                                                                                                                                                            | 2086      | Healthy Control | LIKELEY PATHOGENIC                      |                                                                                                                                                                                                                                                                                                                                                                                                                                                                                                                                                                                                                                                                                                                                                                                                                                                                                                                                                            | wgs           | WGS_healthyFreq                      |
| chr11_47348424_47348424_C_T         | MYBPC3 |          |                         | rs397516074                                                                                                                                                                                                                                                                                                                                                                                                                                                                                                                                                                                                                           | 693 (EMR) | HCM             | PATHOGENIC (in dad)                     | The EMR data noted the dad had this mutation. We believe this mutation is pathogenic, however the patient was never tested for it. Our WGS reveals the patient does not actually carry this mutation. This variant is found in 7 patients in our cohort: 3 unrelated HCM patients (319, 431, 582) + 2 related HCM patients (711, 712) + 2 unrelated DCM patients (811, 814). This does not mean this variant wasn't pathogenic in the dad, as 693 could have gotten their pathogenic mutation from their mom.                                                                                                                                                                                                                                                                                                                                                                                                                                              | clin_fam, wgs | clin_research, WGS_AbsentDoubleCheck |

Table S6

| sample          | Line | CellType | Condition | BioRep | LibraryPreparationBatch | SequencingPool | GC content after filtering (Fastp) | % Duplication (Fastp) | NUM_UniquelyMappedFrag Millions (STAR) | MeanReads (avg F&R; Millions) (FastQC) | PCT_RIBOSOMAL_BASES (Picard) | PCT_CODEEnd UTR (Picard) | PCT_UniquelyMappedFrag Millions (STAR) |
|-----------------|------|----------|-----------|--------|-------------------------|----------------|------------------------------------|-----------------------|----------------------------------------|----------------------------------------|------------------------------|--------------------------|----------------------------------------|
| 2003dms0_r1     | 2003 | cm       | dms0      | r1     | sw10a                   | sw11b          | 50.30%                             | 47.20%                | 62.539685                              | 80.954059                              | 0.004383                     | 0.855332                 | 83.64                                  |
| 2003ips_r1      | 2003 | ips      | ips       | r1     | sw09                    | sw11b          | 51.30%                             | 22.50%                | 47.822322                              | 66.74269                               | 0.064762                     | 0.762871                 | 75.68                                  |
| 2003ips_r2      | 2003 | ips      | ips       | r2     | sw10b                   | sw11d          | 49.10%                             | 35.40%                | 53.858656                              | 64.417335                              | 0.00288                      | 0.847528                 | 87.51                                  |
| 2003myk0.25_r1  | 2003 | cm       | myk025    | r1     | sw10b                   | sw11b          | 47.60%                             | 26.00%                | 40.059896                              | 49.379751                              | 0.009469                     | 0.62332                  | 84.28                                  |
| 2003omec0.4_r1  | 2003 | cm       | omec04    | r1     | sw10a                   | sw11b          | 49.20%                             | 59.10%                | 44.343124                              | 57.360816                              | 0.003493                     | 0.879318                 | 85.2                                   |
| 2007ips_r1      | 2007 | ips      | ips       | r1     | sw10a                   | sw11c          | 47.20%                             | 40.00%                | 60.537711                              | 69.517315                              | 0.006372                     | 0.75122                  | 89.8                                   |
| 2007ips_r2      | 2007 | ips      | ips       | r2     | sw10b                   | sw11b          | 50.30%                             | 25.20%                | 67.45426                               | 83.817058                              | 0.018556                     | 0.810332                 | 83.09                                  |
| 2009dms0_r1     | 2009 | cm       | dms0      | r1     | sw10b                   | sw11a          | 50.80%                             | 30.50%                | 73.313799                              | 92.156584                              | 0.018549                     | 0.853681                 | 81.25                                  |
| 2009ips_r1      | 2009 | ips      | ips       | r1     | sw09                    | sw11a          | 52.90%                             | 22.40%                | 36.351625                              | 60.332424                              | 0.045297                     | 0.767597                 | 66.47                                  |
| 2009myk0.25_r1  | 2009 | cm       | myk025    | r1     | sw10b                   | sw11a          | 50.30%                             | 23.60%                | 24.814347                              | 30.849938                              | 0.016816                     | 0.831578                 | 82.38                                  |
| 2009omec0.4_r1  | 2009 | cm       | omec04    | r1     | sw10b                   | sw11a          | 50.50%                             | 27.20%                | 64.880825                              | 80.118233                              | 0.017102                     | 0.854572                 | 82.4                                   |
| 2013dms0_r1     | 2013 | cm       | dms0      | r1     | sw10a                   | sw11c          | 49.90%                             | 63.70%                | 50.519146                              | 64.663282                              | 0.008304                     | 0.859492                 | 85.87                                  |
| 2013ips_r1      | 2013 | ips      | ips       | r1     | sw10b                   | sw11c          | 49.30%                             | 21.30%                | 34.84084                               | 40.381469                              | 0.004877                     | 0.813107                 | 88.53                                  |
| 2013myk0.25_r1  | 2013 | cm       | myk025    | r1     | sw10b                   | sw11c          | 48.40%                             | 42.50%                | 45.594798                              | 55.280593                              | 0.007964                     | 0.826949                 | 87.15                                  |
| 2013omec0.4_r1  | 2013 | cm       | omec04    | r1     | sw10a                   | sw11c          | 50.00%                             | 61.30%                | 50.529073                              | 61.457531                              | 0.002071                     | 0.868491                 | 87.68                                  |
| 2015dms0_r1     | 2015 | cm       | dms0      | r1     | sw09                    | sw11b          | 51.50%                             | 20.90%                | 52.350078                              | 73.270384                              | 0.022529                     | 0.842932                 | 79.01                                  |
| 2015ips_r1      | 2015 | ips      | ips       | r1     | sw09                    | sw11b          | 51.20%                             | 23.10%                | 39.427773                              | 55.564992                              | 0.029137                     | 0.824275                 | 77.9                                   |
| 2015myk0.25_r1  | 2015 | cm       | myk025    | r1     | sw09                    | sw11b          | 49.90%                             | 23.00%                | 43.468233                              | 58.148526                              | 0.020999                     | 0.834551                 | 82.31                                  |
| 2015omec0.4_r1  | 2015 | cm       | omec04    | r1     | sw09                    | sw11b          | 50.40%                             | 35.80%                | 89.048686                              | 122.102495                             | 0.025648                     | 0.855753                 | 81.6                                   |
| 2020dms0_r1     | 2020 | cm       | dms0      | r1     | sw12-BB                 | sw12-BB        | 50.60%                             | 31.00%                | 54.006279                              | 64.025656                              | 0.011046                     | 0.854338                 | 85.25                                  |
| 2020Domec1.0_r1 | 2020 | cm       | omec10    | r1     | sw12-BB                 | sw12-BB        | 51.00%                             | 32.70%                | 54.779448                              | 65.41854                               | 0.009552                     | 0.865048                 | 84.95                                  |
| 2025ips_r1      | 2025 | ips      | ips       | r1     | sw12-AA                 | sw12-AA        | 50.20%                             | 39.40%                | 38.084511                              | 72.710677                              | 0.15974                      | 0.685593                 | 56.43                                  |
| 2036dms0_r1     | 2036 | cm       | dms0      | r1     | sw10b                   | sw11b          | 49.20%                             | 25.90%                | 39.517192                              | 46.433689                              | 0.010067                     | 0.839099                 | 87.17                                  |
| 2036dms0_r2     | 2036 | cm       | dms0      | r2     | sw10bmanual             | sw11a          | 48.30%                             | 21.80%                | 62.137608                              | 70.815811                              | 0.00182                      | 0.864781                 | 88.43                                  |
| 2036ips_r1      | 2036 | ips      | ips       | r1     | sw09                    | sw11b          | 50.60%                             | 19.30%                | 35.066249                              | 47.832428                              | 0.016378                     | 0.848225                 | 80.57                                  |
| 2036ips_r2      | 2036 | ips      | ips       | r2     | sw10b                   | sw11a          | 49.70%                             | 28.10%                | 73.197143                              | 86.613604                              | 0.007512                     | 0.857317                 | 86.28                                  |
| 2036myk0.25_r1  | 2036 | cm       | myk025    | r1     | sw10b                   | sw11b          | 49.70%                             | 29.00%                | 42.179178                              | 51.28433                               | 0.011651                     | 0.834578                 | 84.82                                  |
| 2036myk0.25_r2  | 2036 | cm       | myk025    | r2     | sw10b                   | sw11a          | 50.00%                             | 27.40%                | 46.615421                              | 57.104626                              | 0.016198                     | 0.834835                 | 83.93                                  |
| 2036omec0.4_r1  | 2036 | cm       | omec04    | r1     | sw10b                   | sw11b          | 49.90%                             | 35.90%                | 62.286681                              | 76.586923                              | 0.01263                      | 0.836841                 | 84.02                                  |
| 2036omec0.4_r2  | 2036 | cm       | omec04    | r2     | sw10b                   | sw11a          | 49.10%                             | 40.60%                | 74.305653                              | 89.131378                              | 0.01175                      | 0.8627                   | 85.4                                   |
| 2086ips_r1      | 2086 | ips      | ips       | r1     | sw12-AA                 | sw12-AA        | 48.70%                             | 37.60%                | 41.419996                              | 78.297212                              | 0.021685                     | 0.661913                 | 55.4                                   |
| 283dms0_r1      | 283  | cm       | dms0      | r1     | sw04                    | sw11c          | 52.40%                             | 28.20%                | 39.624098                              | 65.331468                              | 0.088848                     | 0.738456                 | 61.63                                  |
| 283ips_r1       | 283  | ips      | ips       | r1     | sw04                    | sw11c          | 51.60%                             | 32.90%                | 65.511867                              | 103.254057                             | 0.067462                     | 0.738614                 | 64.79                                  |
| 284dms0_r1      | 284  | cm       | dms0      | r1     | sw03                    | sw11a          | 51.30%                             | 36.20%                | 61.460192                              | 95.375744                              | 0.05695                      | 0.781501                 | 69.05                                  |
| 284dms0_r2      | 284  | cm       | dms0      | r2     | sw04                    | sw11b          | 50.10%                             | 28.00%                | 40.96328                               | 54.059724                              | 0.040327                     | 0.806483                 | 77.75                                  |
| 284ips_r1       | 284  | ips      | ips       | r1     | sw03                    | sw11a          | 53.70%                             | 44.90%                | 59.44872                               | 149.883103                             | 0.122667                     | 0.623248                 | 42.54                                  |
| 287dms0_r1      | 287  | cm       | dms0      | r1     | sw03                    | sw11a          | 51.90%                             | 38.40%                | 90.02388                               | 133.359522                             | 0.057786                     | 0.800301                 | 71.53                                  |
| 287dms0_r2      | 287  | cm       | dms0      | r2     | sw04                    | sw11c          | 50.60%                             | 38.00%                | 46.940733                              | 61.157297                              | 0.030598                     | 0.830709                 | 78.41                                  |
| 287ips_r1       | 287  | ips      | ips       | r1     | sw03                    | sw11a          | 50.30%                             | 32.80%                | 85.555972                              | 116.255419                             | 0.030259                     | 0.823999                 | 77.96                                  |
| 289dms0_r1      | 289  | cm       | dms0      | r1     | sw03                    | sw11b          | 50.90%                             | 38.30%                | 93.636816                              | 124.996919                             | 0.044242                     | 0.816507                 | 78.68                                  |
| 289dms0_r2      | 289  | cm       | dms0      | r2     | sw04                    | sw11c          | 51.50%                             | 35.10%                | 49.902509                              | 72.561791                              | 0.054785                     | 0.799939                 | 70.07                                  |
| 289ips_r1       | 289  | ips      | ips       | r1     | sw03                    | sw11b          | 52.10%                             | 29.30%                | 59.487682                              | 93.291105                              | 0.05987                      | 0.774857                 | 66.81                                  |
| 295dms0_r1      | 295  | cm       | dms0      | r1     | sw04                    | sw11a          | 51.40%                             | 33.30%                | 56.398087                              | 79.802103                              | 0.056169                     | 0.784269                 | 72.26                                  |
| 295ips_r1       | 295  | ips      | ips       | r1     | sw04                    | sw11a          | 52.00%                             | 26.30%                | 43.045158                              | 67.722671                              | 0.058782                     | 0.766432                 | 64.86                                  |
| 297dms0_r1      | 297  | cm       | dms0      | r1     | sw03                    | sw11a          | 52.60%                             | 28.20%                | 32.635166                              | 55.095821                              | 0.099667                     | 0.742694                 | 63.49                                  |
| 297dms0_r2      | 297  | cm       | dms0      | r2     | sw04                    | sw11b          | 51.60%                             | 29.70%                | 38.698999                              | 57.203194                              | 0.055539                     | 0.788542                 | 69.48                                  |
| 297ips_r1       | 297  | ips      | ips       | r1     | sw03                    | sw11a          | 51.70%                             | 31.70%                | 60.270551                              | 91.095804                              | 0.057723                     | 0.789897                 | 71.43                                  |
| 298dms0_r1      | 298  | cm       | dms0      | r1     | sw04                    | sw11c          | 53.00%                             | 29.80%                | 31.55685                               | 62.190031                              | 0.093077                     | 0.704291                 | 51.86                                  |
| 298ips_r1       | 298  | ips      | ips       | r1     | sw04                    | sw11c          | 53.10%                             | 26.40%                | 37.002649                              | 75.799271                              | 0.104211                     | 0.671333                 | 49.88                                  |
| 301dms0_r1      | 301  | cm       | dms0      | r1     | sw03                    | sw11d          | 52.20%                             | 41.50%                | 67.540606                              | 103.498162                             | 0.069675                     | 0.772407                 | 68.89                                  |
| 301ips_r1       | 301  | ips      | ips       | r1     | sw03                    | sw11d          | 50.90%                             | 27.60%                | 47.095755                              | 63.014751                              | 0.02184                      | 0.83812                  | 79.17                                  |
| 304ips_r1       | 304  | ips      | ips       | r1     | sw03                    | sw11b          | 54.10%                             | 31.90%                | 59.246483                              | 156.540622                             | 0.119987                     | 0.624168                 | 40.38                                  |
| 310dms0_r1      | 310  | cm       | dms0      | r1     | sw03                    | sw11a          | 53.10%                             | 45.20%                | 67.190036                              | 138.696469                             | 0.091669                     | 0.689663                 | 51.52                                  |
| 310ips_r1       | 310  | ips      | ips       | r1     | sw03                    | sw11a          | 51.50%                             | 28.30%                | 41.911878                              | 60.399023                              | 0.036176                     | 0.82359                  | 73.84                                  |
| 319dms0_r1      | 319  | cm       | dms0      | r1     | sw04                    | sw11b          | 53.80%                             | 29.80%                | 40.703943                              | 90.02978                               | 0.111876                     | 0.658975                 | 46.09                                  |
| 319ips_r1       | 319  | ips      | ips       | r1     | sw04                    | sw11b          | 51.20%                             | 25.20%                | 42.700183                              | 59.561314                              | 0.038825                     | 0.814026                 | 72.79                                  |
| 320dms0_r1      | 320  | cm       | dms0      | r1     | sw03                    | sw11c          | 52.60%                             | 34.20%                | 30.957048                              | 49.701566                              | 0.062735                     | 0.799358                 | 66.26                                  |
| 320dms0_r2      | 320  | cm       | dms0      | r2     | sw04                    | sw11a          | 52.60%                             | 34.40%                | 39.508717                              | 65.702912                              | 0.067618                     | 0.764093                 | 61.15                                  |
| 320ips_r1       | 320  | ips      | ips       | r1     | sw03                    | sw11c          | 51.40%                             | 34.70%                | 75.695147                              | 108.199514                             | 0.034507                     | 0.818881                 | 74.87                                  |
| 333dms0_r1      | 333  | cm       | dms0      | r1     | sw04                    | sw11c          | 52.20%                             | 32.50%                | 54.70965                               | 80.357938                              | 0.059074                     | 0.804908                 | 69.15                                  |
| 333ips_r1       | 333  | ips      | ips       | r1     | sw04                    | sw11c          | 51.90%                             | 27.00%                | 46.310498                              | 65.18917                               | 0.066488                     | 0.780417                 | 72.27                                  |
| 334dms0_r1      | 334  | cm       | dms0      | r1     | sw04                    | sw11d          | 51.20%                             | 39.10%                | 61.500067                              | 87.935801                              | 0.050465                     | 0.805965                 | 72.46                                  |
| 334dms0_r2      | 334  | cm       | dms0      | r2     | sw04                    | sw11c          | 53.10%                             | 28.00%                | 29.147052                              | 48.069909                              | 0.071336                     | 0.765471                 | 61.73                                  |
| 334ips_r1       | 334  | ips      | ips       | r1     | sw04                    | sw11d          | 50.60%                             | 31.40%                | 53.497811                              | 73.949456                              | 0.037995                     | 0.810966                 | 73.92                                  |
| 338dms0_r1      | 338  | cm       | dms0      | r1     | sw04                    | sw11b          | 53.30%                             | 28.10%                | 39.25627                               | 72.235323                              | 0.089826                     | 0.719175                 | 55.17                                  |
| 338ips_r1       | 338  | ips      | ips       | r1     | sw04                    | sw11b          | 54.10%                             | 23.00%                | 40.593361                              | 101.020816                             | 0.121414                     | 0.608461                 | 40.73                                  |
| 352ips_r1       | 352  | ips      | ips       | r1     | sw03                    | sw11a          | 53.30%                             | 46.40%                | 59.650446                              | 128.993577                             | 0.082502                     | 0.706626                 | 48.94                                  |
| 356dms0_r1      | 356  | cm       | dms0      | r1     | sw04                    | sw11a          | 52.40%                             | 33.90%                | 44.522567                              | 69.713542                              | 0.071806                     | 0.760535                 | 65.1                                   |
| 356dms0_r2      | 356  | cm       | dms0      | r2     | sw04                    | sw11b          | 53.00%                             | 30.40%                | 38.208166                              | 66.32143                               | 0.088122                     | 0.732118                 | 58.59                                  |
| 356ips_r1       | 356  | ips      | ips       | r1     | sw04                    | sw11a          | 50.20%                             | 27.50%                | 35.83098                               | 47.372639                              | 0.030711                     | 0.82848                  | 77.56                                  |
| 358dms0_r1      | 358  | cm       | dms0      | r1     | sw04                    | sw11b          | 51.60%                             | 31.10%                | 52.487452                              | 70.439312                              | 0.042917                     | 0.830775                 | 75.62                                  |
| 358ips_r1       | 358  | ips      | ips       | r1     | sw04                    | sw11b          | 53.20%                             | 28.20%                | 43.67645                               | 83.162462                              | 0.09112                      | 0.707646                 | 53.26                                  |

|                |     |     |        |    |             |         |  |        |        |            |            |          |          |       |
|----------------|-----|-----|--------|----|-------------|---------|--|--------|--------|------------|------------|----------|----------|-------|
| 367dmso_r1     | 367 | cm  | dmso   | r1 | sw03        | sw11d   |  | 52.90% | 34.20% | 28.163355  | 58.887721  | 0.119321 | 0.670764 | 50.73 |
| 367ips_r1      | 367 | ips | ips    | r1 | sw03        | sw11d   |  | 54.60% | 42.40% | 53.838975  | 191.358279 | 0.139785 | 0.551802 | 29.79 |
| 371dmso_r1     | 371 | cm  | dmso   | r1 | sw04        | sw11c   |  | 52.60% | 32.20% | 46.938589  | 80.665788  | 0.083321 | 0.730294 | 59.8  |
| 371ips_r1      | 371 | ips | ips    | r1 | sw04        | sw11c   |  | 51.70% | 31.60% | 66.289616  | 89.732929  | 0.047652 | 0.798245 | 75.2  |
| 372dmso_r1     | 372 | cm  | dmso   | r1 | sw03        | sw11a   |  | 53.70% | 37.10% | 52.517192  | 128.149167 | 0.119639 | 0.650692 | 44.41 |
| 372ips_r1      | 372 | ips | ips    | r1 | sw03        | sw11a   |  | 53.60% | 34.90% | 47.497213  | 108.277695 | 0.09955  | 0.680587 | 46.83 |
| 373dmso_r1     | 373 | cm  | dmso   | r1 | sw06        | sw11d   |  | 51.70% | 25.50% | 38.6952    | 61.705578  | 0.058152 | 0.799592 | 68.69 |
| 373ips_r1      | 373 | ips | ips    | r1 | sw06        | sw11d   |  | 49.60% | 30.90% | 58.602372  | 86.975544  | 0.020656 | 0.833941 | 78.51 |
| 374dmso_r1     | 374 | cm  | dmso   | r1 | sw04        | sw11b   |  | 54.20% | 27.00% | 37.985368  | 98.999452  | 0.129237 | 0.603749 | 39.23 |
| 374ips_r1      | 374 | ips | ips    | r1 | sw04        | sw11b   |  | 53.40% | 28.20% | 38.383614  | 80.851846  | 0.10552  | 0.672139 | 48.18 |
| 375dmso_r1     | 375 | cm  | dmso   | r1 | sw04        | sw11c   |  | 51.60% | 33.90% | 39.139844  | 54.160311  | 0.040856 | 0.819112 | 73.76 |
| 375ips_r1      | 375 | ips | ips    | r1 | sw04        | sw11c   |  | 51.90% | 28.90% | 50.556293  | 77.624717  | 0.051299 | 0.791981 | 66.72 |
| 376dmso_r1     | 376 | cm  | dmso   | r1 | sw04        | sw11d   |  | 52.10% | 30.90% | 52.1962    | 82.946384  | 0.088619 | 0.737838 | 64.24 |
| 376ips_r1      | 376 | ips | ips    | r1 | sw04        | sw11d   |  | 52.10% | 30.60% | 32.834101  | 55.721056  | 0.071644 | 0.74772  | 60.21 |
| 378dmso_r1     | 378 | cm  | dmso   | r1 | sw04        | sw11b   |  | 52.30% | 33.10% | 60.017067  | 90.047421  | 0.071891 | 0.773369 | 67.77 |
| 378ips_r1      | 378 | ips | ips    | r1 | sw04        | sw11b   |  | 51.60% | 27.30% | 41.038545  | 61.729363  | 0.053462 | 0.779867 | 67.87 |
| 380dmso_r1     | 380 | cm  | dmso   | r1 | sw06        | sw11b   |  | 50.20% | 51.40% | 128.536329 | 195.402653 | 0.031436 | 0.817305 | 73.86 |
| 380ips_r1      | 380 | ips | ips    | r1 | sw06        | sw11b   |  | 49.00% | 37.30% | 96.312896  | 133.091575 | 0.017598 | 0.843316 | 81.11 |
| 388dmso_r1     | 388 | cm  | dmso   | r1 | sw06        | sw11a   |  | 49.70% | 32.00% | 67.625963  | 92.226701  | 0.023153 | 0.849766 | 79.54 |
| 388dmso_r2     | 388 | cm  | dmso   | r2 | sw08        | sw11b   |  | 52.60% | 21.90% | 26.842013  | 49.699616  | 0.080041 | 0.742375 | 57.4  |
| 388ips_r1      | 388 | ips | ips    | r1 | sw06        | sw11a   |  | 49.90% | 28.50% | 63.187967  | 91.149223  | 0.016353 | 0.835423 | 79.11 |
| 390dmso_r1     | 390 | cm  | dmso   | r1 | sw06        | sw11d   |  | 50.00% | 33.20% | 87.159283  | 118.426798 | 0.035883 | 0.83279  | 79.32 |
| 390ips_r1      | 390 | ips | ips    | r1 | sw06        | sw11d   |  | 50.00% | 18.00% | 75.864141  | 100.656236 | 0.058775 | 0.788405 | 79.31 |
| 393ips_r1      | 393 | ips | ips    | r1 | sw05        | sw11c   |  | 50.30% | 31.70% | 81.571366  | 124.040227 | 0.054221 | 0.783393 | 70    |
| 394dmso_r1     | 394 | cm  | dmso   | r1 | sw05        | sw11c   |  | 50.90% | 27.90% | 50.509828  | 72.051622  | 0.044133 | 0.823439 | 72.38 |
| 394ips_r1      | 394 | ips | ips    | r1 | sw05        | sw11c   |  | 51.30% | 27.80% | 60.426198  | 94.916308  | 0.066257 | 0.765233 | 65.7  |
| 395dmso_r1     | 395 | cm  | dmso   | r1 | sw07        | sw11d   |  | 50.10% | 47.90% | 54.393613  | 80.594271  | 0.022622 | 0.850672 | 75.6  |
| 395ips_r1      | 395 | ips | ips    | r1 | sw07        | sw11d   |  | 49.60% | 27.50% | 54.404872  | 70.484744  | 0.020155 | 0.83477  | 81.22 |
| 397dmso_r1     | 397 | cm  | dmso   | r1 | sw03        | sw11b   |  | 52.90% | 37.80% | 51.06809   | 79.503906  | 0.059192 | 0.798126 | 69.1  |
| 397dmso_r2     | 397 | cm  | dmso   | r2 | sw04        | sw11a   |  | 52.50% | 35.50% | 45.114875  | 69.344002  | 0.058653 | 0.788031 | 66.74 |
| 397ips_r1      | 397 | ips | ips    | r1 | sw03        | sw11b   |  | 51.00% | 25.50% | 37.242936  | 56.880394  | 0.044544 | 0.789663 | 70.04 |
| 398dmso_r1     | 398 | cm  | dmso   | r1 | sw05        | sw11a   |  | 53.10% | 26.70% | 43.536233  | 109.758084 | 0.126061 | 0.654522 | 42.06 |
| 398ips_r1      | 398 | ips | ips    | r1 | sw05        | sw11a   |  | 50.80% | 24.80% | 49.34187   | 85.450078  | 0.075067 | 0.754508 | 62.31 |
| 405dmso_r1     | 405 | cm  | dmso   | r1 | sw07        | sw11b   |  | 50.90% | 33.40% | 67.071215  | 100.703214 | 0.055046 | 0.803622 | 70.48 |
| 411dmso_r1     | 411 | cm  | dmso   | r1 | sw07        | sw11c   |  | 49.80% | 40.80% | 86.348934  | 122.293113 | 0.039756 | 0.836257 | 76.21 |
| 413dmso_r1     | 413 | cm  | dmso   | r1 | sw08        | sw11b   |  | 51.00% | 22.70% | 20.770538  | 36.164441  | 0.076734 | 0.754531 | 61.82 |
| 419dmso_r2     | 419 | cm  | dmso   | r2 | sw08        | sw11d   |  | 49.90% | 25.10% | 39.289612  | 50.061575  | 0.026898 | 0.86103  | 80.57 |
| 419ips_r1      | 419 | ips | ips    | r1 | sw10a       | sw11c   |  | 49.50% | 23.60% | 48.207609  | 59.560232  | 0.002099 | 0.867365 | 85.06 |
| 420dmso_r1     | 420 | cm  | dmso   | r1 | sw10b       | sw11a   |  | 48.90% | 26.80% | 43.993202  | 53.272446  | 0.019154 | 0.82869  | 84.82 |
| 421dmso_r1     | 421 | cm  | dmso   | r1 | sw09        | sw11a   |  | 51.60% | 37.70% | 78.940508  | 113.144988 | 0.014046 | 0.839711 | 77.63 |
| 428dmso_r1     | 428 | cm  | dmso   | r1 | sw08        | sw11d   |  | 51.90% | 32.80% | 48.2061    | 95.066867  | 0.093754 | 0.716044 | 54.91 |
| 428ips_r1      | 428 | ips | ips    | r1 | sw12-AA     | sw12-AA |  | 51.30% | 17.00% | 25.434175  | 93.390521  | 0.26805  | 0.53012  | 28.05 |
| 431Homec0.4_r1 | 431 | cm  | omec04 | r1 | sw12-AA     | sw12-AA |  | 49.40% | 44.20% | 46.741396  | 103.399218 | 0.190298 | 0.642301 | 47.4  |
| 431ips_r1      | 431 | ips | ips    | r1 | sw12-AA     | sw12-AA |  | 50.30% | 29.40% | 45.572884  | 104.978658 | 0.212524 | 0.613006 | 44.8  |
| 437dmso_r1     | 437 | cm  | dmso   | r1 | sw08        | sw11a   |  | 51.70% | 28.20% | 33.001629  | 54.621922  | 0.074231 | 0.762406 | 63.18 |
| 438dmso_r1     | 438 | cm  | dmso   | r1 | sw08        | sw11d   |  | 49.60% | 38.10% | 78.572741  | 108.808108 | 0.033046 | 0.843786 | 77.26 |
| 440dmso_r1     | 440 | cm  | dmso   | r1 | sw10a       | sw11b   |  | 50.30% | 60.00% | 31.115053  | 41.25575   | 0.003434 | 0.871343 | 84.58 |
| 440ips_r1      | 440 | ips | ips    | r1 | sw10a       | sw11b   |  | 50.10% | 27.80% | 79.317391  | 96.111169  | 0.003692 | 0.864944 | 85.14 |
| 440myk0.25_r1  | 440 | cm  | myk025 | r1 | sw10a       | sw11b   |  | 49.80% | 40.70% | 50.931403  | 61.486891  | 0.005754 | 0.871124 | 86.26 |
| 440omec0.4_r1  | 440 | cm  | omec04 | r1 | sw10a       | sw11b   |  | 49.00% | 63.00% | 34.135661  | 42.766511  | 0.002885 | 0.868785 | 87.42 |
| 494dmso_r1     | 494 | cm  | dmso   | r1 | sw08        | sw11a   |  | 50.60% | 43.10% | 47.559835  | 68.120095  | 0.031797 | 0.79576  | 75.31 |
| 501dmso_r1     | 501 | cm  | dmso   | r1 | sw08        | sw11d   |  | 51.00% | 22.50% | 26.40619   | 40.645982  | 0.070853 | 0.770939 | 67.37 |
| 502dmso_r1     | 502 | cm  | dmso   | r1 | sw10b       | sw11b   |  | 48.80% | 28.40% | 55.924287  | 67.84945   | 0.011875 | 0.855639 | 86.73 |
| 502myk0.25_r1  | 502 | cm  | myk025 | r1 | sw09        | sw11b   |  | 50.70% | 26.20% | 48.256469  | 65.284297  | 0.020799 | 0.812379 | 80.14 |
| 503dmso_r1     | 503 | cm  | dmso   | r1 | sw08        | sw11c   |  | 51.30% | 25.20% | 50.988582  | 70.056707  | 0.047292 | 0.814188 | 74.18 |
| 512Cdmso_r1    | 512 | cm  | dmso   | r1 | sw12-BB     | sw12-BB |  | 52.00% | 40.20% | 45.007579  | 62.241008  | 0.011831 | 0.839438 | 79.77 |
| 512Cmyk0.25_r1 | 512 | cm  | myk025 | r1 | sw12-BB     | sw12-BB |  | 51.20% | 36.20% | 37.770781  | 52.632229  | 0.011554 | 0.840044 | 79.66 |
| 512Comec0.4_r1 | 512 | cm  | omec04 | r1 | sw12-BB     | sw12-BB |  | 51.80% | 37.40% | 52.757757  | 72.914944  | 0.011136 | 0.835126 | 80.09 |
| 512Comec1.0_r1 | 512 | cm  | omec10 | r1 | sw12-BB     | sw12-BB |  | 51.90% | 37.40% | 46.740581  | 65.661936  | 0.010185 | 0.842742 | 79.2  |
| 512ips_r1      | 512 | ips | ips    | r1 | sw12-BB     | sw12-BB |  | 48.70% | 22.80% | 63.176205  | 79.918533  | 0.007798 | 0.833914 | 85.48 |
| 517dmso_r1     | 517 | cm  | dmso   | r1 | sw10bmanual | sw11c   |  | 48.10% | 25.00% | 52.632335  | 62.163442  | 0.001135 | 0.867869 | 86.79 |
| 519dmso_r1     | 519 | cm  | dmso   | r1 | sw08        | sw11a   |  | 51.20% | 26.30% | 35.627269  | 51.882418  | 0.049129 | 0.81552  | 70.71 |
| 520dmso_r1     | 520 | cm  | dmso   | r1 | sw09        | sw11b   |  | 50.40% | 29.90% | 59.745383  | 82.528121  | 0.014366 | 0.845373 | 83.65 |
| 521dmso_r1     | 521 | cm  | dmso   | r1 | sw09        | sw11d   |  | 50.50% | 23.00% | 42.111345  | 57.505047  | 0.030442 | 0.849502 | 81.88 |
| 526dmso_r1     | 526 | cm  | dmso   | r1 | sw09        | sw11d   |  | 48.60% | 28.50% | 47.625225  | 61.491731  | 0.016692 | 0.857721 | 86.49 |
| 530dmso_r1     | 530 | cm  | dmso   | r1 | sw09        | sw11d   |  | 50.40% | 27.00% | 43.669732  | 59.033266  | 0.013949 | 0.870309 | 84.16 |
| 532dmso_r1     | 532 | cm  | dmso   | r1 | sw09        | sw11a   |  | 50.70% | 39.40% | 44.9205    | 63.991214  | 0.015061 | 0.857128 | 81.97 |
| 532ips_r1      | 532 | ips | ips    | r1 | sw09        | sw11a   |  | 51.60% | 21.60% | 45.018209  | 66.001389  | 0.028023 | 0.815989 | 74.35 |
| 534dmso_r1     | 534 | cm  | dmso   | r1 | sw10b       | sw11a   |  | 49.60% | 48.00% | 126.105336 | 153.222461 | 0.016404 | 0.836101 | 84.11 |
| 534ips_r1      | 534 | ips | ips    | r1 | sw09        | sw11a   |  | 50.20% | 18.60% | 30.281721  | 40.452215  | 0.012592 | 0.826827 | 84.01 |
| 534myk0.25_r1  | 534 | cm  | myk025 | r1 | sw10a       | sw11a   |  | 50.20% | 32.30% | 27.120236  | 35.340002  | 0.006922 | 0.84984  | 83.94 |
| 534omec0.4_r1  | 534 | cm  | omec04 | r1 | sw10a       | sw11a   |  | 46.50% | 62.10% | 34.167518  | 41.255763  | 0.002669 | 0.813565 | 87.41 |
| 535dmso_r1     | 535 | cm  | dmso   | r1 | sw10b       | sw11a   |  | 48.80% | 49.50% | 87.555292  | 101.972175 | 0.010362 | 0.861645 | 88    |
| 535ips_r1      | 535 | ips | ips    | r1 | sw09        | sw11a   |  | 50.90% | 18.90% | 36.708673  | 49.233802  | 0.025611 | 0.819317 | 81.81 |
| 541dmso_r1     | 541 | cm  | dmso   | r1 | sw10a       | sw11c   |  | 49.90% | 39.30% | 54.732014  | 65.648591  | 0.004326 | 0.880368 | 86.5  |

|                |     |     |        |    |             |         |  |        |        |            |            |          |          |       |
|----------------|-----|-----|--------|----|-------------|---------|--|--------|--------|------------|------------|----------|----------|-------|
| 541ips_r1      | 541 | ips | ips    | r1 | sw09        | sw11b   |  | 51.10% | 18.60% | 32.72826   | 46.52303   | 0.062712 | 0.760553 | 76.97 |
| 541myk0.25_r1  | 541 | cm  | myk025 | r1 | sw10a       | sw11c   |  | 48.70% | 41.30% | 53.999729  | 64.217599  | 0.00493  | 0.856871 | 87.33 |
| 541omec0.4_r1  | 541 | cm  | omec04 | r1 | sw10a       | sw11c   |  | 50.10% | 42.90% | 61.613321  | 78.460586  | 0.00461  | 0.882528 | 84.15 |
| 543ips_r1      | 543 | ips | ips    | r1 | sw10b       | sw11d   |  | 49.90% | 25.10% | 52.656225  | 63.127062  | 0.007527 | 0.82004  | 86.76 |
| 544dmso_r1     | 544 | cm  | dmso   | r1 | sw10b       | sw11b   |  | 49.90% | 21.90% | 25.176286  | 29.859023  | 0.009136 | 0.845949 | 86.28 |
| 544ips_r1      | 544 | ips | ips    | r1 | sw09        | sw11b   |  | 50.70% | 18.90% | 42.837937  | 60.11345   | 0.028529 | 0.82116  | 78.34 |
| 546dmso_r1     | 546 | cm  | dmso   | r1 | sw09        | sw11a   |  | 50.60% | 21.40% | 25.516424  | 34.971036  | 0.024423 | 0.830308 | 80.78 |
| 546ips_r1      | 546 | ips | ips    | r1 | sw10a       | sw11a   |  | 49.10% | 25.80% | 50.939129  | 62.223259  | 0.003435 | 0.781164 | 86.14 |
| 546myk0.25_r1  | 546 | cm  | myk025 | r1 | sw09        | sw11a   |  | 52.60% | 18.30% | 29.270184  | 41.485296  | 0.02445  | 0.834968 | 77.35 |
| 555dmso_r1     | 555 | cm  | dmso   | r1 | sw09        | sw11a   |  | 50.90% | 23.80% | 27.63253   | 37.371959  | 0.020938 | 0.847212 | 81.97 |
| 555myk0.25_r1  | 555 | cm  | myk025 | r1 | sw09        | sw11a   |  | 50.40% | 23.00% | 35.737268  | 49.17088   | 0.031611 | 0.829773 | 80.72 |
| 557dmso_r1     | 557 | cm  | dmso   | r1 | sw08        | sw11b   |  | 49.80% | 26.80% | 33.799592  | 45.995357  | 0.025907 | 0.855729 | 78.79 |
| 562Ddmso_r1    | 562 | cm  | dmso   | r1 | sw12-AA     | sw12-AA |  | 49.00% | 43.10% | 50.767605  | 102.437999 | 0.190285 | 0.646949 | 51.18 |
| 562Dmyk0.25_r1 | 562 | cm  | myk025 | r1 | sw12-AA     | sw12-AA |  | 49.30% | 48.30% | 46.13347   | 97.764979  | 0.198917 | 0.636977 | 50.14 |
| 562ips_r1      | 562 | ips | ips    | r1 | sw12-AA     | sw12-AA |  | 47.80% | 21.70% | 31.0119    | 51.981234  | 0.156955 | 0.702394 | 60.88 |
| 565dmso_r1     | 565 | cm  | dmso   | r1 | sw10b       | sw11a   |  | 50.10% | 28.60% | 62.173914  | 73.383608  | 0.008692 | 0.858112 | 86.82 |
| 565dmso_r2     | 565 | cm  | dmso   | r2 | sw10a       | sw11b   |  | 50.50% | 49.70% | 85.55552   | 101.909845 | 0.004164 | 0.890591 | 87.8  |
| 565ips_r1      | 565 | ips | ips    | r1 | sw10a       | sw11a   |  | 49.90% | 41.70% | 100.105707 | 117.387169 | 0.002802 | 0.874573 | 87.57 |
| 565myk0.25_r1  | 565 | cm  | myk025 | r1 | sw10b       | sw11a   |  | 49.60% | 22.70% | 37.803552  | 44.579015  | 0.013259 | 0.845663 | 86.79 |
| 565myk0.25_r2  | 565 | cm  | myk025 | r2 | sw10a       | sw11b   |  | 50.20% | 55.40% | 64.729978  | 85.178723  | 0.005122 | 0.883482 | 85.22 |
| 565omec0.4_r1  | 565 | cm  | omec04 | r1 | sw10b       | sw11a   |  | 49.60% | 25.50% | 44.07123   | 52.237138  | 0.01029  | 0.859102 | 86.48 |
| 565omec0.4_r2  | 565 | cm  | omec04 | r2 | sw10a       | sw11b   |  | 48.10% | 60.20% | 44.362215  | 55.024207  | 0.002481 | 0.87549  | 88.08 |
| 570Bomec1.0_r1 | 570 | cm  | omec10 | r1 | sw12-BB     | sw12-BB |  | 51.10% | 25.90% | 50.629704  | 65.690784  | 0.018585 | 0.853586 | 81.93 |
| 570ips_r1      | 570 | ips | ips    | r1 | sw12-BB     | sw12-BB |  | 50.10% | 43.60% | 44.163385  | 58.37553   | 0.008779 | 0.86177  | 83.06 |
| 571Fdmso_r1    | 571 | cm  | dmso   | r1 | sw12-BB     | sw12-BB |  | 51.00% | 29.90% | 45.240831  | 60.115964  | 0.011558 | 0.851572 | 81.48 |
| 571Fmyk0.25_r1 | 571 | cm  | myk025 | r1 | sw12-BB     | sw12-BB |  | 50.80% | 30.30% | 37.371488  | 49.945089  | 0.012715 | 0.847622 | 81.62 |
| 571Fomec0.4_r1 | 571 | cm  | omec04 | r1 | sw12-BB     | sw12-BB |  | 51.80% | 36.40% | 47.978338  | 66.200262  | 0.011458 | 0.834941 | 79.46 |
| 571Fomec1.0_r1 | 571 | cm  | omec10 | r1 | sw12-BB     | sw12-BB |  | 52.90% | 34.10% | 39.225795  | 66.635126  | 0.048517 | 0.764721 | 64.31 |
| 571ips_r1      | 571 | ips | ips    | r1 | sw12-BB     | sw12-BB |  | 50.40% | 20.70% | 52.778428  | 68.348825  | 0.013743 | 0.857037 | 81.86 |
| 582ips_r1      | 582 | ips | ips    | r1 | sw12-AA     | sw12-AA |  | 49.50% | 36.40% | 34.916267  | 69.059223  | 0.214813 | 0.64314  | 53.38 |
| 592ips_r1      | 592 | ips | ips    | r1 | sw10a       | sw11c   |  | 47.70% | 51.50% | 50.857681  | 63.584195  | 0.001719 | 0.867801 | 87.21 |
| 603dmso_r1     | 603 | cm  | dmso   | r1 | sw10a       | sw11c   |  | 50.60% | 42.80% | 67.382517  | 83.260351  | 0.005815 | 0.881403 | 85.04 |
| 603dmso_r2     | 603 | cm  | dmso   | r2 | sw10b       | sw11d   |  | 50.20% | 24.20% | 37.429957  | 44.231441  | 0.009775 | 0.868781 | 86.79 |
| 603ips_r1      | 603 | ips | ips    | r1 | sw10a       | sw11c   |  | 49.40% | 54.40% | 48.233935  | 60.121835  | 0.001591 | 0.870173 | 87.76 |
| 603myk0.25_r1  | 603 | cm  | myk025 | r1 | sw10a       | sw11c   |  | 50.30% | 41.40% | 59.845099  | 74.353345  | 0.004481 | 0.83437  | 84.46 |
| 603myk0.25_r2  | 603 | cm  | myk025 | r2 | sw10b       | sw11d   |  | 49.00% | 24.40% | 22.507152  | 26.523945  | 0.009535 | 0.85641  | 87.26 |
| 603omec0.4_r1  | 603 | cm  | omec04 | r1 | sw10a       | sw11c   |  | 51.00% | 49.80% | 74.275049  | 91.873661  | 0.004521 | 0.869075 | 84.22 |
| 603omec0.4_r2  | 603 | cm  | omec04 | r2 | sw10b       | sw11d   |  | 49.80% | 37.80% | 75.02549   | 89.447677  | 0.012338 | 0.871286 | 85.57 |
| 612ips_r1      | 612 | ips | ips    | r1 | sw12-AA     | sw12-AA |  | 50.00% | 26.70% | 31.90106   | 76.291386  | 0.240166 | 0.596948 | 43.13 |
| 622ips_r1      | 622 | ips | ips    | r1 | sw10a       | sw11d   |  | 49.10% | 41.80% | 50.080269  | 62.341055  | 0.002786 | 0.87297  | 85.81 |
| 653dmso_r1     | 653 | cm  | dmso   | r1 | sw10a       | sw11d   |  | 50.00% | 44.50% | 59.550346  | 73.636846  | 0.003869 | 0.891043 | 86.8  |
| 653ips_r1      | 653 | ips | ips    | r1 | sw10a       | sw11d   |  | 48.70% | 47.70% | 73.587016  | 88.116465  | 0.001924 | 0.875705 | 87.92 |
| 653myk0.25_r1  | 653 | cm  | myk025 | r1 | sw10b       | sw11d   |  | 50.60% | 57.50% | 144.648086 | 184.66818  | 0.023155 | 0.849798 | 80.41 |
| 653omec0.4_r1  | 653 | cm  | omec04 | r1 | sw10a       | sw11d   |  | 51.90% | 71.20% | 35.693054  | 63.777759  | 0.016377 | 0.716322 | 62.65 |
| 662Eomec0.4_r1 | 662 | cm  | omec04 | r1 | sw12-BB     | sw12-BB |  | 53.00% | 26.60% | 37.123606  | 54.589637  | 0.063008 | 0.731516 | 73.29 |
| 662Eomec1.0_r1 | 662 | cm  | omec10 | r1 | sw12-BB     | sw12-BB |  | 52.20% | 31.70% | 48.890671  | 66.170329  | 0.015678 | 0.870128 | 80.05 |
| 662ips_r1      | 662 | ips | ips    | r1 | sw12-BB     | sw12-BB |  | 50.10% | 27.00% | 28.470425  | 72.439237  | 0.211392 | 0.586425 | 40.87 |
| 673ips_r1      | 673 | ips | ips    | r1 | sw12-AA     | sw12-AA |  | 49.70% | 30.00% | 39.490705  | 72.406605  | 0.184919 | 0.678696 | 58.33 |
| 697Ddmso_r1    | 697 | cm  | dmso   | r1 | sw12-BB     | sw12-BB |  | 51.10% | 31.70% | 47.150725  | 61.639022  | 0.01032  | 0.862568 | 83.16 |
| 697Dmyk0.25_r1 | 697 | cm  | myk025 | r1 | sw12-BB     | sw12-BB |  | 51.10% | 36.40% | 54.441006  | 72.402251  | 0.013117 | 0.855645 | 80.34 |
| 697Domec0.4_r1 | 697 | cm  | omec04 | r1 | sw12-BB     | sw12-BB |  | 50.80% | 44.20% | 50.815347  | 69.067355  | 0.014405 | 0.848599 | 79.96 |
| 697ips_r1      | 697 | ips | ips    | r1 | sw12-BB     | sw12-BB |  | 48.90% | 19.20% | 65.390065  | 81.268318  | 0.008277 | 0.834507 | 85.13 |
| 738dmso_r1     | 738 | cm  | dmso   | r1 | sw10b       | sw11c   |  | 51.50% | 25.00% | 32.651873  | 39.671491  | 0.008494 | 0.868109 | 84.62 |
| 738dmso_r2     | 738 | cm  | dmso   | r2 | sw10a       | sw11d   |  | 49.60% | 67.20% | 51.26617   | 64.717636  | 0.007223 | 0.87646  | 86.6  |
| 738ips_r1      | 738 | ips | ips    | r1 | sw10a       | sw11c   |  | 49.20% | 50.10% | 79.153512  | 95.016254  | 0.00141  | 0.879315 | 87.85 |
| 738myk0.25_r2  | 738 | cm  | myk025 | r2 | sw10b       | sw11d   |  | 49.90% | 29.60% | 45.615053  | 58.758739  | 0.025149 | 0.846291 | 80.3  |
| 738omec0.4_r1  | 738 | cm  | omec04 | r1 | sw10bmanual | sw11c   |  | 47.50% | 19.80% | 59.329362  | 71.374542  | 0.000899 | 0.897016 | 84.42 |
| 738omec0.4_r2  | 738 | cm  | omec04 | r2 | sw10a       | sw11d   |  | 50.20% | 43.70% | 50.517001  | 61.703228  | 0.004462 | 0.87506  | 85.25 |
| 811ips_r1      | 811 | ips | ips    | r1 | sw12-AA     | sw12-AA |  | 49.10% | 33.20% | 32.410619  | 61.606594  | 0.184381 | 0.67051  | 56.32 |
| 813ips_r1      | 813 | ips | ips    | r1 | sw12-AA     | sw12-AA |  | 49.70% | 28.90% | 43.025039  | 73.89741   | 0.143929 | 0.715423 | 61.19 |
| 822Cmyk0.25_r1 | 822 | cm  | myk025 | r1 | sw12-BB     | sw12-BB |  | 50.60% | 36.00% | 44.728252  | 61.063068  | 0.011214 | 0.866926 | 82.12 |
| 822Comec0.4_r1 | 822 | cm  | omec04 | r1 | sw12-BB     | sw12-BB |  | 50.60% | 46.50% | 104.684055 | 132.374485 | 0.007571 | 0.872123 | 84.28 |
| 822Comec1.0_r1 | 822 | cm  | omec10 | r1 | sw12-BB     | sw12-BB |  | 50.10% | 26.20% | 50.338246  | 57.801671  | 0.008045 | 0.868347 | 87.97 |
| 822ips_r1      | 822 | ips | ips    | r1 | sw12-BB     | sw12-BB |  | 50.00% | 40.80% | 24.755594  | 74.364587  | 0.258405 | 0.548832 | 35.71 |
| 839ips_r1      | 839 | ips | ips    | r1 | sw10a       | sw11a   |  | 46.20% | 55.60% | 50.211612  | 58.2215    | 0.00171  | 0.850968 | 90    |
| 860Fdmso_r1    | 860 | cm  | dmso   | r1 | sw12-BB     | sw12-BB |  | 51.50% | 38.70% | 37.924798  | 49.999342  | 0.010814 | 0.850318 | 82.65 |
| 860Fmyk0.25_r1 | 860 | cm  | myk025 | r1 | sw12-BB     | sw12-BB |  | 50.70% | 40.20% | 53.76336   | 68.509591  | 0.009013 | 0.847251 | 83.4  |
| 860ips_r1      | 860 | ips | ips    | r1 | sw12-BB     | sw12-BB |  | 50.30% | 32.20% | 170.18782  | 221.710547 | 0.008575 | 0.852347 | 80.78 |
| 861ips_r1      | 861 | ips | ips    | r1 | sw12-AA     | sw12-AA |  | 50.70% | 19.10% | 27.825498  | 70.103303  | 0.245267 | 0.591319 | 41.16 |
| 862Edmso_r1    | 862 | cm  | dmso   | r1 | sw12-BB     | sw12-BB |  | 51.70% | 35.80% | 49.14476   | 69.426492  | 0.009327 | 0.83214  | 79.25 |
| 862Emyk0.25_r1 | 862 | cm  | myk025 | r1 | sw12-BB     | sw12-BB |  | 51.20% | 35.50% | 45.578683  | 60.211293  | 0.012466 | 0.830831 | 81.33 |
| 862Eomec0.4_r1 | 862 | cm  | omec04 | r1 | sw12-BB     | sw12-BB |  | 52.20% | 44.50% | 57.272998  | 79.598134  | 0.008543 | 0.837881 | 78.75 |
| 862Eomec1.0_r1 | 862 | cm  | omec10 | r1 | sw12-BB     | sw12-BB |  | 52.40% | 42.10% | 41.769031  | 59.520132  | 0.011956 | 0.834402 | 77.97 |
| 868ips_r1      | 868 | ips | ips    | r1 | sw12-AA     | sw12-AA |  | 49.90% | 25.40% | 31.63751   | 61.667255  | 0.214488 | 0.634313 | 52.55 |
| 869Edmso_r1    | 869 | cm  | dmso   | r1 | sw12-BB     | sw12-BB |  | 50.50% | 28.80% | 53.243121  | 63.832447  | 0.013729 | 0.86275  | 84.5  |

|                |     |     |        |    |         |         |        |        |           |            |          |          |       |
|----------------|-----|-----|--------|----|---------|---------|--------|--------|-----------|------------|----------|----------|-------|
| 869ips_r1      | 869 | ips | ips    | r1 | sw12-BB | sw12-BB | 50.40% | 19.10% | 55.897001 | 73.185766  | 0.013641 | 0.821155 | 80.38 |
| 885ips_r1      | 885 | ips | ips    | r1 | sw12-AA | sw12-AA | 50.80% | 19.90% | 21.241841 | 49.909702  | 0.221234 | 0.625899 | 44.25 |
| 910Cdmso_r1    | 910 | cm  | dms0   | r1 | sw12-BB | sw12-BB | 51.50% | 31.90% | 43.678077 | 56.974965  | 0.010971 | 0.855925 | 82.03 |
| 910Cmyk0.25_r1 | 910 | cm  | myk025 | r1 | sw12-BB | sw12-BB | 50.70% | 34.60% | 41.586788 | 54.977407  | 0.010446 | 0.851081 | 81.98 |
| 910Comec0.4_r1 | 910 | cm  | omec04 | r1 | sw12-BB | sw12-BB | 51.50% | 36.00% | 51.887818 | 66.943957  | 0.012362 | 0.855771 | 82.56 |
| 910Comec1.0_r1 | 910 | cm  | omec10 | r1 | sw12-BB | sw12-BB | 51.70% | 33.80% | 46.276577 | 63.318577  | 0.014242 | 0.860214 | 80.37 |
| 910ips_r1      | 910 | ips | ips    | r1 | sw12-BB | sw12-BB | 50.00% | 17.00% | 42.625376 | 57.560876  | 0.01261  | 0.841673 | 81.11 |
| 915ips_r1      | 915 | ips | ips    | r1 | sw12-AA | sw12-AA | 49.20% | 25.00% | 38.216306 | 64.140273  | 0.175175 | 0.685573 | 61.17 |
| 920ips_r1      | 920 | ips | ips    | r1 | sw12-AA | sw12-AA | 50.70% | 17.70% | 31.221033 | 65.080985  | 0.232974 | 0.60958  | 49.28 |
| 925Edmso_r1    | 925 | cm  | dms0   | r1 | sw12-BB | sw12-BB | 51.60% | 35.40% | 44.993495 | 60.762792  | 0.010032 | 0.795571 | 80.82 |
| 925ips_r1      | 925 | ips | ips    | r1 | sw12-AA | sw12-AA | 49.20% | 28.60% | 42.26725  | 74.550692  | 0.200877 | 0.673319 | 58.1  |
| 928Admso_r1    | 928 | cm  | dms0   | r1 | sw12-BB | sw12-BB | 50.40% | 25.70% | 36.588715 | 47.720285  | 0.008961 | 0.813102 | 83.95 |
| 928Amyk0.25_r1 | 928 | cm  | myk025 | r1 | sw12-BB | sw12-BB | 51.40% | 42.90% | 48.010101 | 64.1693    | 0.011153 | 0.835782 | 81.93 |
| 928Aomec0.4_r1 | 928 | cm  | omec04 | r1 | sw12-BB | sw12-BB | 51.30% | 36.60% | 39.413656 | 54.280726  | 0.008885 | 0.83421  | 81.99 |
| 928Aomec1.0_r1 | 928 | cm  | omec10 | r1 | sw12-BB | sw12-BB | 50.90% | 38.00% | 43.043805 | 54.93192   | 0.011333 | 0.813143 | 83.91 |
| 928ips_r1      | 928 | ips | ips    | r1 | sw12-BB | sw12-BB | 49.50% | 22.70% | 41.773474 | 56.922112  | 0.010019 | 0.849762 | 81.66 |
| 933dms0_r1     | 933 | cm  | dms0   | r1 | sw10a   | sw11d   | 50.00% | 51.70% | 90.331204 | 107.471273 | 0.003977 | 0.875531 | 87.53 |
| 933dms0_r2     | 933 | cm  | dms0   | r2 | sw10b   | sw11b   | 49.70% | 23.70% | 32.461452 | 38.864347  | 0.013011 | 0.858443 | 85.76 |
| 933ips_r1      | 933 | ips | ips    | r1 | sw09    | sw11d   | 49.30% | 21.90% | 40.12219  | 53.855654  | 0.012135 | 0.835803 | 81.38 |
| 933ips_r2      | 933 | ips | ips    | r2 | sw10b   | sw11b   | 50.40% | 25.70% | 52.653818 | 66.036729  | 0.023222 | 0.803677 | 81.53 |
| 933myk0.25_r1  | 933 | cm  | myk025 | r1 | sw10a   | sw11d   | 49.20% | 65.20% | 34.29313  | 46.880921  | 0.002169 | 0.812693 | 84.08 |
| 933myk0.25_r2  | 933 | cm  | myk025 | r2 | sw10b   | sw11b   | 49.10% | 27.70% | 46.030926 | 55.830131  | 0.013622 | 0.856508 | 85.44 |
| 933omec0.4_r1  | 933 | cm  | omec04 | r1 | sw10a   | sw11d   | 47.50% | 68.30% | 60.760218 | 69.582066  | 0.002145 | 0.865542 | 89.87 |
| 933omec0.4_r2  | 933 | cm  | omec04 | r2 | sw10b   | sw11b   | 49.00% | 29.50% | 53.896007 | 64.906411  | 0.013799 | 0.865634 | 85.62 |
| 934dms0_r1     | 934 | cm  | dms0   | r1 | sw09    | sw11d   | 51.00% | 30.30% | 80.701729 | 124.420327 | 0.039828 | 0.806093 | 71.31 |
| 934ips_r1      | 934 | ips | ips    | r1 | sw09    | sw11d   | 50.10% | 24.30% | 56.048316 | 76.4074    | 0.014836 | 0.832472 | 80.16 |
| 934myk0.25_r1  | 934 | cm  | myk025 | r1 | sw09    | sw11d   | 50.00% | 33.70% | 65.795331 | 88.630753  | 0.00966  | 0.849173 | 82.92 |
| 934omec0.4_r1  | 934 | cm  | omec04 | r1 | sw09    | sw11d   | 52.10% | 34.60% | 81.513133 | 111.689115 | 0.030739 | 0.820937 | 79.95 |
| 936dms0_r1     | 936 | cm  | dms0   | r1 | sw09    | sw11b   | 52.20% | 40.40% | 89.071204 | 121.116097 | 0.01371  | 0.855445 | 80.99 |
| 936myk0.25_r1  | 936 | cm  | myk025 | r1 | sw10b   | sw11b   | 49.60% | 33.30% | 60.224503 | 72.852274  | 0.01015  | 0.862553 | 85.67 |
| 936omec0.4_r1  | 936 | cm  | omec04 | r1 | sw09    | sw11b   | 49.10% | 31.40% | 54.78249  | 71.402359  | 0.008336 | 0.856432 | 84.06 |
| 941dms0_r1     | 941 | cm  | dms0   | r1 | sw09    | sw11c   | 51.60% | 20.00% | 34.874449 | 47.369961  | 0.053303 | 0.817813 | 79    |
| 941ips_r1      | 941 | ips | ips    | r1 | sw09    | sw11c   | 49.20% | 18.40% | 37.509454 | 47.745372  | 0.028966 | 0.836579 | 82.49 |
| 941myk0.25_r1  | 941 | cm  | myk025 | r1 | sw09    | sw11c   | 50.30% | 27.50% | 93.463333 | 123.636933 | 0.039274 | 0.808138 | 82.55 |
| 941omec0.4_r1  | 941 | cm  | omec04 | r1 | sw09    | sw11c   | 51.20% | 23.90% | 42.737024 | 56.789481  | 0.022587 | 0.85508  | 83.06 |
| 942dms0_r1     | 942 | cm  | dms0   | r1 | sw10b   | sw11a   | 49.20% | 22.50% | 24.61892  | 29.56304   | 0.012181 | 0.848696 | 86.87 |
| 942dms0_r2     | 942 | cm  | dms0   | r2 | sw10a   | sw11d   | 50.50% | 62.30% | 38.650471 | 50.802469  | 0.002111 | 0.849408 | 85.7  |
| 942ips_r1      | 942 | ips | ips    | r1 | sw10b   | sw11b   | 50.70% | 19.60% | 56.382981 | 73.186254  | 0.031119 | 0.833515 | 81.96 |
| 942myk0.25_r1  | 942 | cm  | myk025 | r1 | sw10b   | sw11a   | 49.60% | 20.50% | 20.653616 | 24.499216  | 0.01292  | 0.830298 | 86.39 |
| 942myk0.25_r2  | 942 | cm  | myk025 | r2 | sw10a   | sw11d   | 49.30% | 71.20% | 25.526134 | 33.202759  | 0.002717 | 0.854353 | 86.17 |
| 942omec0.4_r1  | 942 | cm  | omec04 | r1 | sw10b   | sw11a   | 49.60% | 23.20% | 39.697696 | 45.791509  | 0.00606  | 0.875322 | 88.58 |
| 942omec0.4_r2  | 942 | cm  | omec04 | r2 | sw10a   | sw11d   | 50.70% | 61.90% | 43.183087 | 57.426746  | 0.003209 | 0.85916  | 84.63 |
| 944dms0_r1     | 944 | cm  | dms0   | r1 | sw09    | sw11b   | 50.90% | 25.60% | 52.718014 | 68.047515  | 0.023084 | 0.851761 | 83.92 |
| 944ips_r1      | 944 | ips | ips    | r1 | sw09    | sw11b   | 51.00% | 18.50% | 46.380174 | 59.003471  | 0.024055 | 0.828933 | 82.84 |
| 944myk0.25_r1  | 944 | cm  | myk025 | r1 | sw09    | sw11b   | 51.00% | 20.70% | 31.706497 | 41.24733   | 0.017542 | 0.844968 | 83.04 |
| 954dms0_r1     | 954 | cm  | dms0   | r1 | sw09    | sw11a   | 50.30% | 23.40% | 38.482989 | 49.794042  | 0.011187 | 0.866292 | 83.98 |
| 954ips_r1      | 954 | ips | ips    | r1 | sw09    | sw11b   | 49.50% | 26.60% | 60.562388 | 76.53879   | 0.008831 | 0.837715 | 85.07 |
| 954myk0.25_r1  | 954 | cm  | myk025 | r1 | sw09    | sw11a   | 49.40% | 24.60% | 38.28839  | 50.1982    | 0.016225 | 0.849285 | 84.26 |
| 954omec0.4_r1  | 954 | cm  | omec04 | r1 | sw09    | sw11a   | 50.50% | 27.60% | 43.712227 | 56.748144  | 0.01363  | 0.861321 | 83.21 |
| 955dms0_r1     | 955 | cm  | dms0   | r1 | sw10a   | sw11c   | 50.90% | 53.10% | 65.937913 | 80.262925  | 0.006857 | 0.85857  | 85.68 |
| 955dms0_r2     | 955 | cm  | dms0   | r2 | sw10b   | sw11d   | 50.00% | 23.20% | 26.288338 | 31.540819  | 0.011718 | 0.841826 | 85.95 |
| 955ips_r1      | 955 | ips | ips    | r1 | sw09    | sw11c   | 50.20% | 22.00% | 42.805    | 55.301604  | 0.015295 | 0.827678 | 82.17 |
| 955ips_r2      | 955 | ips | ips    | r2 | sw10b   | sw11d   | 49.60% | 21.20% | 35.239993 | 41.352355  | 0.007071 | 0.858839 | 86.79 |
| 955myk0.25_r1  | 955 | cm  | myk025 | r1 | sw10a   | sw11c   | 50.20% | 40.90% | 39.38658  | 51.303886  | 0.005591 | 0.825298 | 83.91 |
| 955myk0.25_r2  | 955 | cm  | myk025 | r2 | sw10b   | sw11d   | 50.80% | 30.90% | 45.523971 | 54.825264  | 0.015465 | 0.844457 | 84.84 |
| 955omec0.4_r1  | 955 | cm  | omec04 | r1 | sw10a   | sw11c   | 50.20% | 49.40% | 67.0139   | 80.848791  | 0.004533 | 0.860887 | 86.04 |
| 959dms0_r1     | 959 | cm  | dms0   | r1 | sw09    | sw11d   | 50.90% | 28.10% | 43.175692 | 56.671542  | 0.010061 | 0.855995 | 83.35 |
| 959ips_r1      | 959 | ips | ips    | r1 | sw09    | sw11d   | 50.00% | 20.90% | 31.66314  | 41.545426  | 0.022139 | 0.785869 | 81.23 |
| 959myk0.25_r1  | 959 | cm  | myk025 | r1 | sw09    | sw11d   | 51.50% | 26.70% | 45.472763 | 61.075545  | 0.01974  | 0.838685 | 81.29 |
| 959omec0.4_r1  | 959 | cm  | omec04 | r1 | sw09    | sw11d   | 51.40% | 23.80% | 43.400474 | 57.229774  | 0.019192 | 0.84834  | 82.37 |
| 960dms0_r1     | 960 | cm  | dms0   | r1 | sw10b   | sw11c   | 49.60% | 28.00% | 57.123358 | 67.172857  | 0.009552 | 0.864758 | 86.82 |
| 960ips_r1      | 960 | ips | ips    | r1 | sw09    | sw11c   | 50.90% | 20.80% | 50.776399 | 66.964559  | 0.025706 | 0.822164 | 79.42 |
| 960myk0.25_r1  | 960 | cm  | myk025 | r1 | sw09    | sw11c   | 49.20% | 23.30% | 28.553729 | 39.600059  | 0.022072 | 0.829964 | 80.43 |
| 960omec0.4_r1  | 960 | cm  | omec04 | r1 | sw09    | sw11c   | 56.00% | 33.10% | 66.531364 | 98.498987  | 0.050242 | 0.772864 | 73.8  |
| 961dms0_r1     | 961 | cm  | dms0   | r1 | sw09    | sw11c   | 51.00% | 25.10% | 55.480941 | 75.131766  | 0.01402  | 0.85308  | 81.65 |
| 961ips_r1      | 961 | ips | ips    | r1 | sw09    | sw11c   | 49.80% | 21.90% | 50.226278 | 66.670401  | 0.0045   | 0.867304 | 82.61 |
| 961myk0.25_r1  | 961 | cm  | myk025 | r1 | sw09    | sw11c   | 50.70% | 23.90% | 43.973116 | 60.260568  | 0.013017 | 0.836215 | 80.37 |
| 962dms0_r1     | 962 | cm  | dms0   | r1 | sw09    | sw11a   | 51.40% | 27.10% | 43.137084 | 61.38376   | 0.038829 | 0.827076 | 78.06 |
| 962ips_r1      | 962 | ips | ips    | r1 | sw09    | sw11a   | 51.40% | 17.50% | 48.523499 | 66.435223  | 0.0433   | 0.804861 | 77    |
| 962myk0.25_r1  | 962 | cm  | myk025 | r1 | sw09    | sw11a   | 51.40% | 21.90% | 24.230398 | 33.832859  | 0.036009 | 0.830076 | 80.17 |
| 962omec0.4_r1  | 962 | cm  | omec04 | r1 | sw09    | sw11a   | 51.00% | 26.40% | 35.556494 | 46.605905  | 0.04619  | 0.816915 | 81.08 |
| 963dms0_r1     | 963 | cm  | dms0   | r1 | sw10a   | sw11c   | 50.90% | 55.10% | 60.73686  | 78.269383  | 0.003666 | 0.884298 | 85.2  |
| 963dms0_r2     | 963 | cm  | dms0   | r2 | sw10b   | sw11d   | 50.40% | 26.40% | 46.701675 | 56.790445  | 0.012412 | 0.8462   | 84.11 |
| 963ips_r1      | 963 | ips | ips    | r1 | sw10a   | sw11c   | 50.50% | 42.20% | 57.137646 | 76.353866  | 0.01541  | 0.829061 | 82.28 |
| 963myk0.25_r1  | 963 | cm  | myk025 | r1 | sw10a   | sw11c   | 47.70% | 69.60% | 35.692282 | 45.266026  | 0.002761 | 0.86082  | 87.71 |

|                |     |     |        |    |         |         |  |        |        |           |           |          |          |       |
|----------------|-----|-----|--------|----|---------|---------|--|--------|--------|-----------|-----------|----------|----------|-------|
| 963myk0.25_r2  | 963 | cm  | myk025 | r2 | sw10b   | sw11d   |  | 49.70% | 22.00% | 22.111615 | 26.285255 | 0.01109  | 0.852244 | 85.7  |
| 963omec0.4_r1  | 963 | cm  | omec04 | r1 | sw10a   | sw11c   |  | 50.40% | 31.20% | 34.940907 | 41.18409  | 0.003721 | 0.890664 | 88.2  |
| 963omec0.4_r2  | 963 | cm  | omec04 | r2 | sw10b   | sw11d   |  | 50.40% | 24.70% | 33.288005 | 40.346557 | 0.011703 | 0.847246 | 84.52 |
| 964dms0_r1     | 964 | cm  | dms0   | r1 | sw09    | sw11b   |  | 52.60% | 21.80% | 43.773898 | 65.349562 | 0.050489 | 0.809632 | 75.94 |
| 964ips_r1      | 964 | ips | ips    | r1 | sw09    | sw11b   |  | 50.50% | 22.60% | 47.333094 | 67.930262 | 0.05183  | 0.798486 | 78.37 |
| 965dms0_r2     | 965 | cm  | dms0   | r2 | sw10b   | sw11b   |  | 49.60% | 25.70% | 47.482416 | 55.860182 | 0.010142 | 0.867442 | 87    |
| 965ips_r1      | 965 | ips | ips    | r1 | sw09    | sw11a   |  | 50.60% | 22.40% | 55.16036  | 75.225362 | 0.026848 | 0.819562 | 80.64 |
| 965ips_r2      | 965 | ips | ips    | r2 | sw10b   | sw11b   |  | 49.50% | 31.00% | 47.092242 | 55.981034 | 0.004132 | 0.83189  | 87.38 |
| 965myk0.25_r2  | 965 | cm  | myk025 | r2 | sw10b   | sw11b   |  | 48.40% | 28.40% | 35.118295 | 41.137446 | 0.009966 | 0.852603 | 87.98 |
| 965omec0.4_r2  | 965 | cm  | omec04 | r2 | sw10b   | sw11b   |  | 48.10% | 31.00% | 62.655682 | 73.375423 | 0.007873 | 0.876323 | 88.56 |
| 967Bdms0_r2    | 967 | cm  | dms0   | r2 | sw12-BB | sw12-BB |  | 49.90% | 51.80% | 50.83429  | 63.325203 | 0.009446 | 0.860592 | 86.57 |
| 967dms0_r1     | 967 | cm  | dms0   | r1 | sw09    | sw11c   |  | 50.70% | 26.30% | 38.652378 | 55.004744 | 0.027177 | 0.846766 | 80.14 |
| 967ips_r1      | 967 | ips | ips    | r1 | sw10a   | sw11c   |  | 49.90% | 33.10% | 48.975063 | 58.272786 | 0.002759 | 0.870268 | 87.03 |
| 969dms0_r1     | 969 | cm  | dms0   | r1 | sw10a   | sw11d   |  | 51.50% | 37.90% | 70.811421 | 87.934329 | 0.009219 | 0.860406 | 82.83 |
| 969ips_r1      | 969 | ips | ips    | r1 | sw10a   | sw11d   |  | 49.90% | 26.90% | 44.196039 | 53.789977 | 0.004731 | 0.8493   | 85.39 |
| 969myk0.25_r1  | 969 | cm  | myk025 | r1 | sw10a   | sw11d   |  | 49.80% | 44.50% | 61.653779 | 77.383702 | 0.004608 | 0.860484 | 84.72 |
| 969omec0.4_r1  | 969 | cm  | omec04 | r1 | sw10a   | sw11d   |  | 49.90% | 35.40% | 49.502374 | 59.245531 | 0.004992 | 0.862872 | 84.94 |
| 979dms0_r1     | 979 | cm  | dms0   | r1 | sw09    | sw11c   |  | 49.80% | 22.80% | 33.992469 | 46.191378 | 0.012388 | 0.840882 | 84.77 |
| 979ips_r1      | 979 | ips | ips    | r1 | sw10b   | sw11c   |  | 49.10% | 30.90% | 59.699306 | 72.238395 | 0.013072 | 0.803605 | 85.28 |
| 986dms0_r1     | 986 | cm  | dms0   | r1 | sw10b   | sw11b   |  | 48.40% | 53.30% | 69.883995 | 84.947442 | 0.009347 | 0.848277 | 86.15 |
| 986dms0_r2     | 986 | cm  | dms0   | r2 | sw10b   | sw11d   |  | 50.90% | 32.90% | 61.216227 | 77.910799 | 0.013022 | 0.860556 | 81.98 |
| 986ips_r1      | 986 | ips | ips    | r1 | sw09    | sw11c   |  | 49.50% | 30.50% | 61.011119 | 86.389275 | 0.016138 | 0.826018 | 81.65 |
| 986myk0.25_r1  | 986 | cm  | myk025 | r1 | sw10a   | sw11b   |  | 50.40% | 43.40% | 56.781781 | 70.183155 | 0.005943 | 0.858414 | 85.44 |
| 986omec0.4_r1  | 986 | cm  | omec04 | r1 | sw10a   | sw11b   |  | 50.30% | 51.10% | 73.725251 | 95.481457 | 0.006099 | 0.87171  | 84.89 |
| 989dms0_r1     | 989 | cm  | dms0   | r1 | sw10a   | sw11a   |  | 50.60% | 47.40% | 70.263042 | 84.80663  | 0.004988 | 0.888873 | 86.44 |
| 989ips_r1      | 989 | ips | ips    | r1 | sw10a   | sw11a   |  | 50.00% | 30.50% | 62.693511 | 77.07226  | 0.001975 | 0.864355 | 86.43 |
| 990dms0_r1     | 990 | cm  | dms0   | r1 | sw10a   | sw11a   |  | 49.50% | 58.80% | 51.047543 | 60.695379 | 0.003921 | 0.865972 | 88.14 |
| 990ips_r1      | 990 | ips | ips    | r1 | sw09    | sw11a   |  | 49.90% | 22.00% | 40.990684 | 58.794546 | 0.026723 | 0.807367 | 79.96 |
| 990ips_r2      | 990 | ips | ips    | r2 | sw10b   | sw11b   |  | 49.00% | 26.70% | 51.991494 | 62.007001 | 0.009326 | 0.842178 | 86.45 |
| 990myk0.25_r1  | 990 | cm  | myk025 | r1 | sw10a   | sw11a   |  | 50.20% | 51.90% | 68.781018 | 83.500926 | 0.025379 | 0.828753 | 84.99 |
| 990omec0.4_r1  | 990 | cm  | omec04 | r1 | sw10a   | sw11a   |  | 49.90% | 59.70% | 45.494853 | 56.530121 | 0.004053 | 0.873537 | 87.33 |
| 991dms0_r1     | 991 | cm  | dms0   | r1 | sw10a   | sw11d   |  | 51.00% | 44.70% | 34.604534 | 44.361708 | 0.01854  | 0.857743 | 84.85 |
| 991dms0_r2     | 991 | cm  | dms0   | r2 | sw09    | sw11c   |  | 49.90% | 34.40% | 46.232019 | 66.978689 | 0.01016  | 0.847927 | 81.28 |
| 991ips_r1      | 991 | ips | ips    | r1 | sw09    | sw11c   |  | 51.70% | 17.10% | 24.228882 | 34.048854 | 0.032678 | 0.815318 | 79.08 |
| 991myk0.25_r1  | 991 | cm  | myk025 | r1 | sw10a   | sw11d   |  | 50.20% | 45.40% | 53.783544 | 64.664584 | 0.005193 | 0.875435 | 87.56 |
| 991omec0.4_r1  | 991 | cm  | omec04 | r1 | sw10a   | sw11d   |  | 50.10% | 58.10% | 74.070874 | 92.693239 | 0.003579 | 0.881636 | 86.41 |
| 995Cdms0_r1    | 995 | cm  | dms0   | r1 | sw12-BB | sw12-BB |  | 51.40% | 34.70% | 36.489949 | 54.068112 | 0.010536 | 0.853912 | 77.54 |
| 995Cmyk0.25_r1 | 995 | cm  | myk025 | r1 | sw12-BB | sw12-BB |  | 50.40% | 27.20% | 43.487809 | 51.886334 | 0.010185 | 0.811971 | 85.51 |
| 995Comec0.4_r1 | 995 | cm  | omec04 | r1 | sw12-BB | sw12-BB |  | 51.30% | 33.90% | 38.587027 | 52.926634 | 0.009863 | 0.823739 | 80.91 |
| 995Comec1.0_r1 | 995 | cm  | omec10 | r1 | sw12-BB | sw12-BB |  | 52.00% | 41.80% | 41.956251 | 57.797046 | 0.007665 | 0.852808 | 80.65 |
